# Supplementary material
Source: publisher figshare collection journal article supplement (https://springernature.figshare.com/articles/dataset/_/12063372)
Supplement: Supplementary file 1 [file 1]

### The protocol for preparing LCTE medicine

1. Buy the materials and weight out each component (detailed in Table 1), the weight should be two times the dose in the Table 1 for oral administration *b.i.d.*
2. Washing all the materials for three times with cold water.
3. Soak the 20 herbal plants in cold water for 45 min.
4. Put the *rudis gypsi miscueris* in pot, add with water to cover it, and boil for 45 min.
5. Take out the soaked herbal plants and added to the pot that boiling the *rudis gypsi miscueris*.
6. Add water to the pot with the water surface to cover all the plants.
7. Boil the plants and *rudis gypsi miscueris* till the water remained in the pot is about 200 ml.
8. Collect the soap in the pot.
9. Add cold water again to the pot with plants and *rudis gypsi miscueris* and repeated the step 7 and 8.
10. Mix the soap collected two times together, and put the mixed soap *i.e.*, the medicine in refrigerator.
11. The medicine soap are orally administrated two times a day, at 40 minutes after breakfast and dinner, respectively, each time with 200 ml. the Soap should be heat to warm before intake.
12. One therapeutic regimen consists three continuous days. The patients could be prescribed for 2 regimens.

Note: the herbal medicine could be prepared for several patients at same time by scaling up the components amounts with the number of the patients.

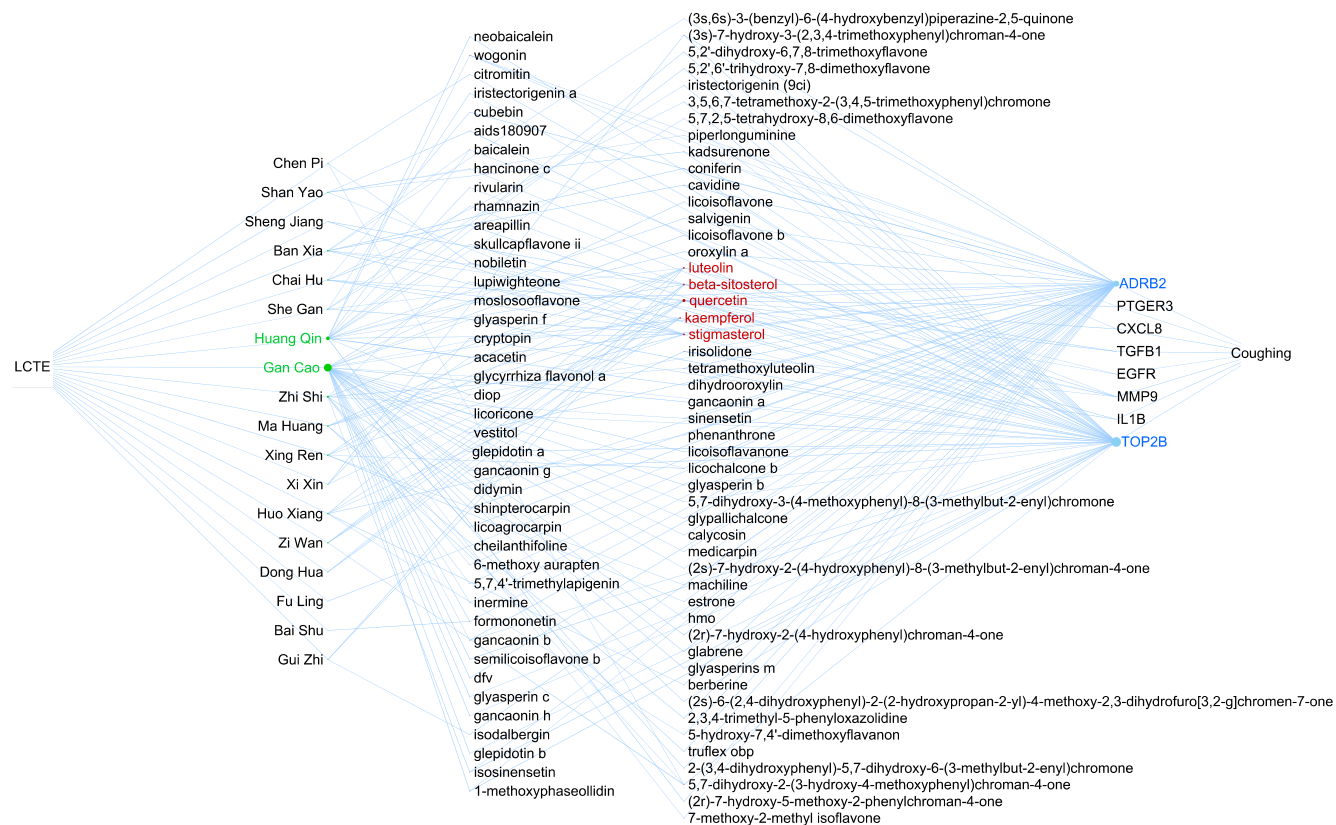

Fig S1. The network of plants, chemical compounds and target proteins for relieving coughing by LCTE

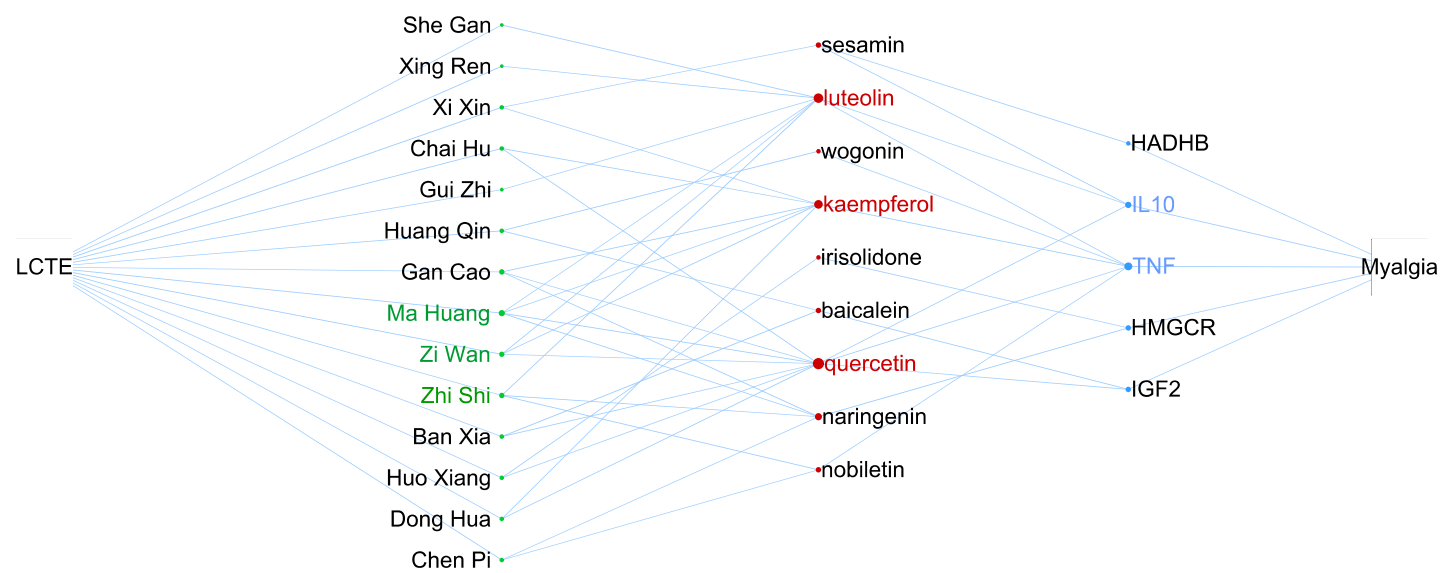

Fig S2. The network of plants, chemical compounds and target proteins for relieving myalgia by LCTE



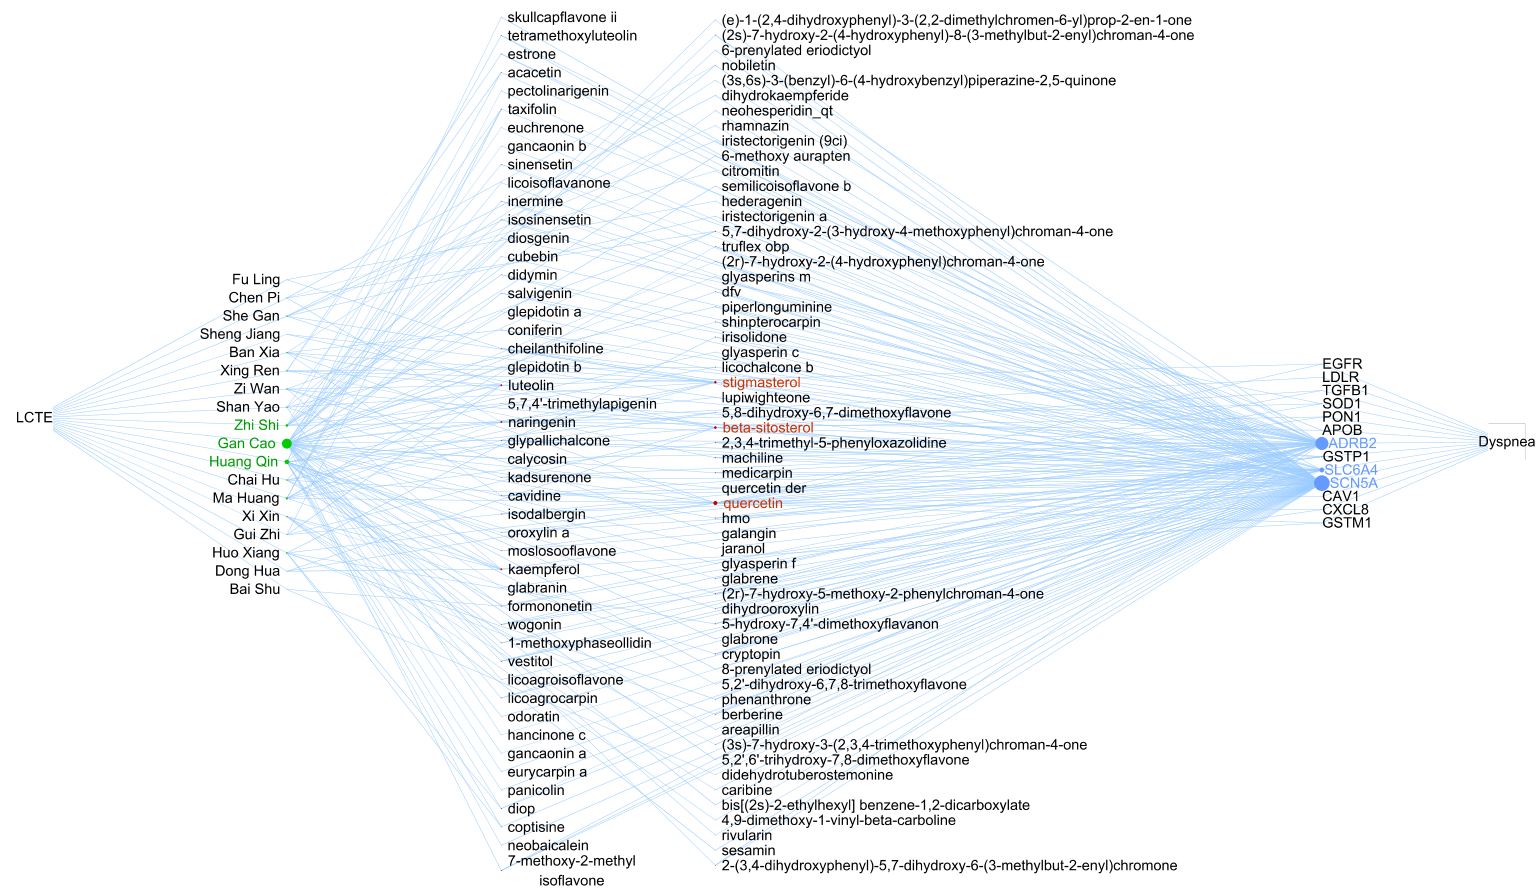

Fig S4. The network of plants, chemical compounds and target proteins for relieving dyspnea by LCTE

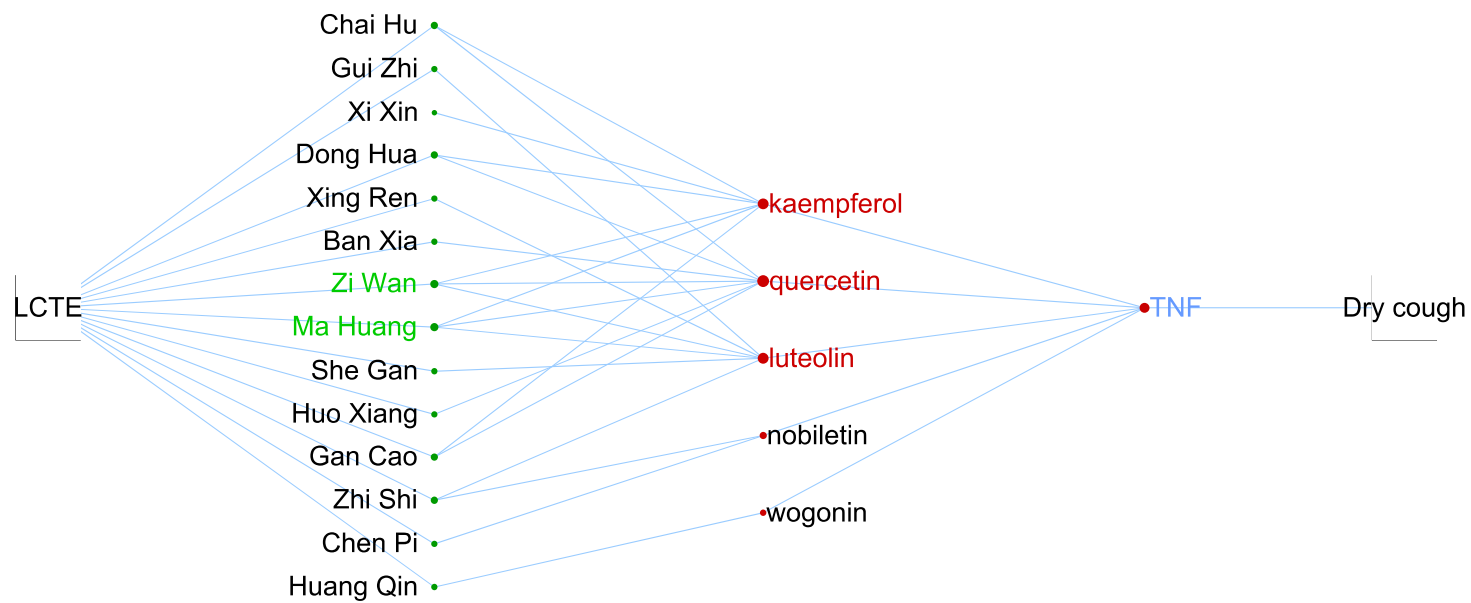

Fig S5. The network of plants, chemical compounds and target proteins for relieving dry cough by LCTE

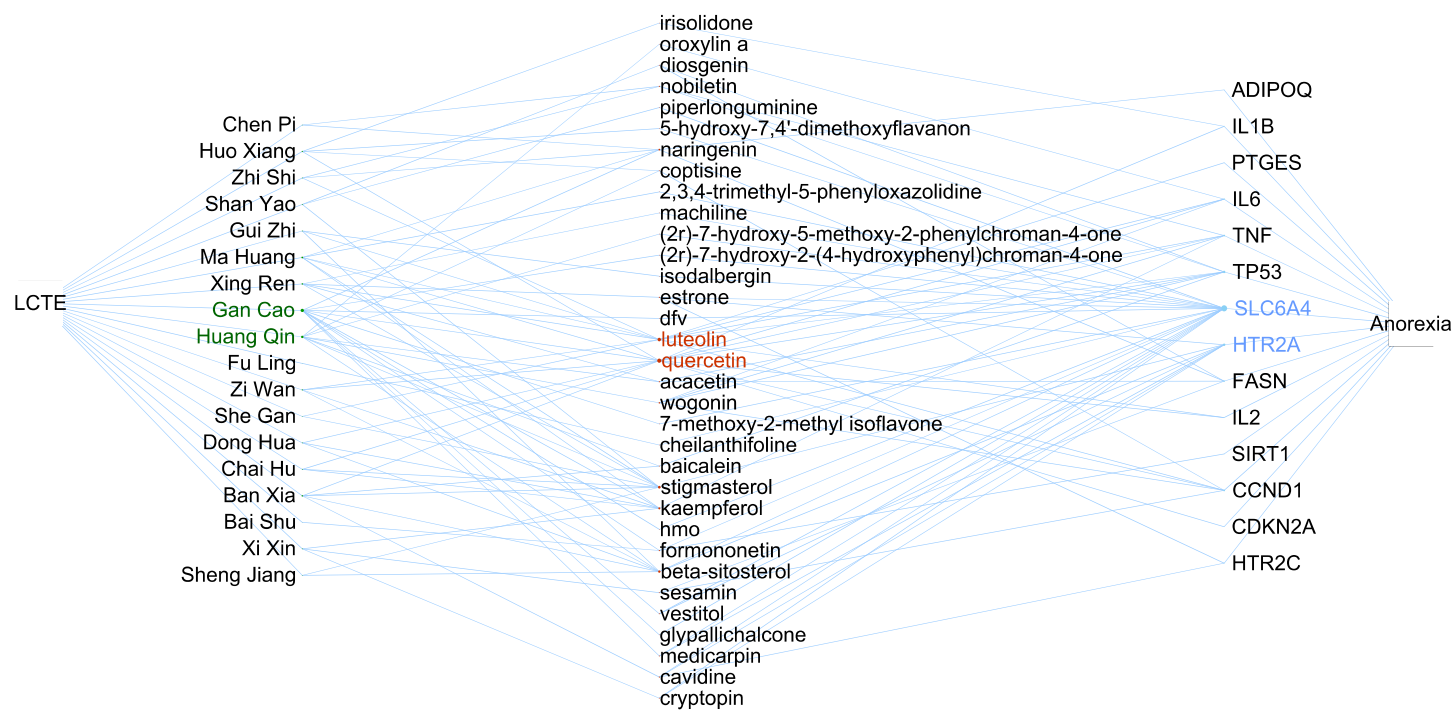

Fig S6. The network of plants, chemical compounds and target proteins for relieving anorexia by LCTE

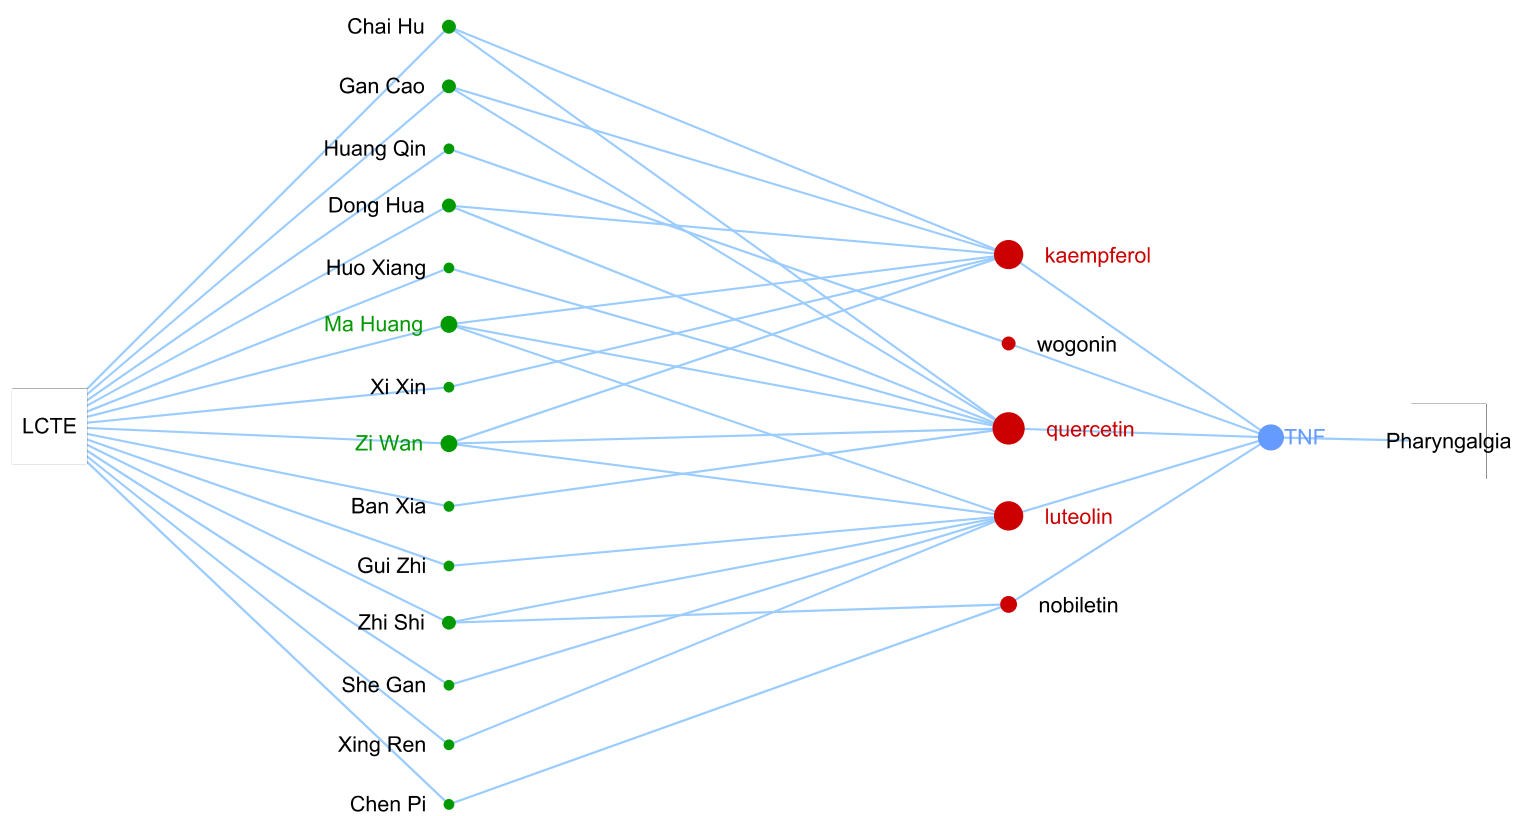

Fig S7. The network of plants, chemical compounds and target proteins for relieving pharyngalgia by LCTE



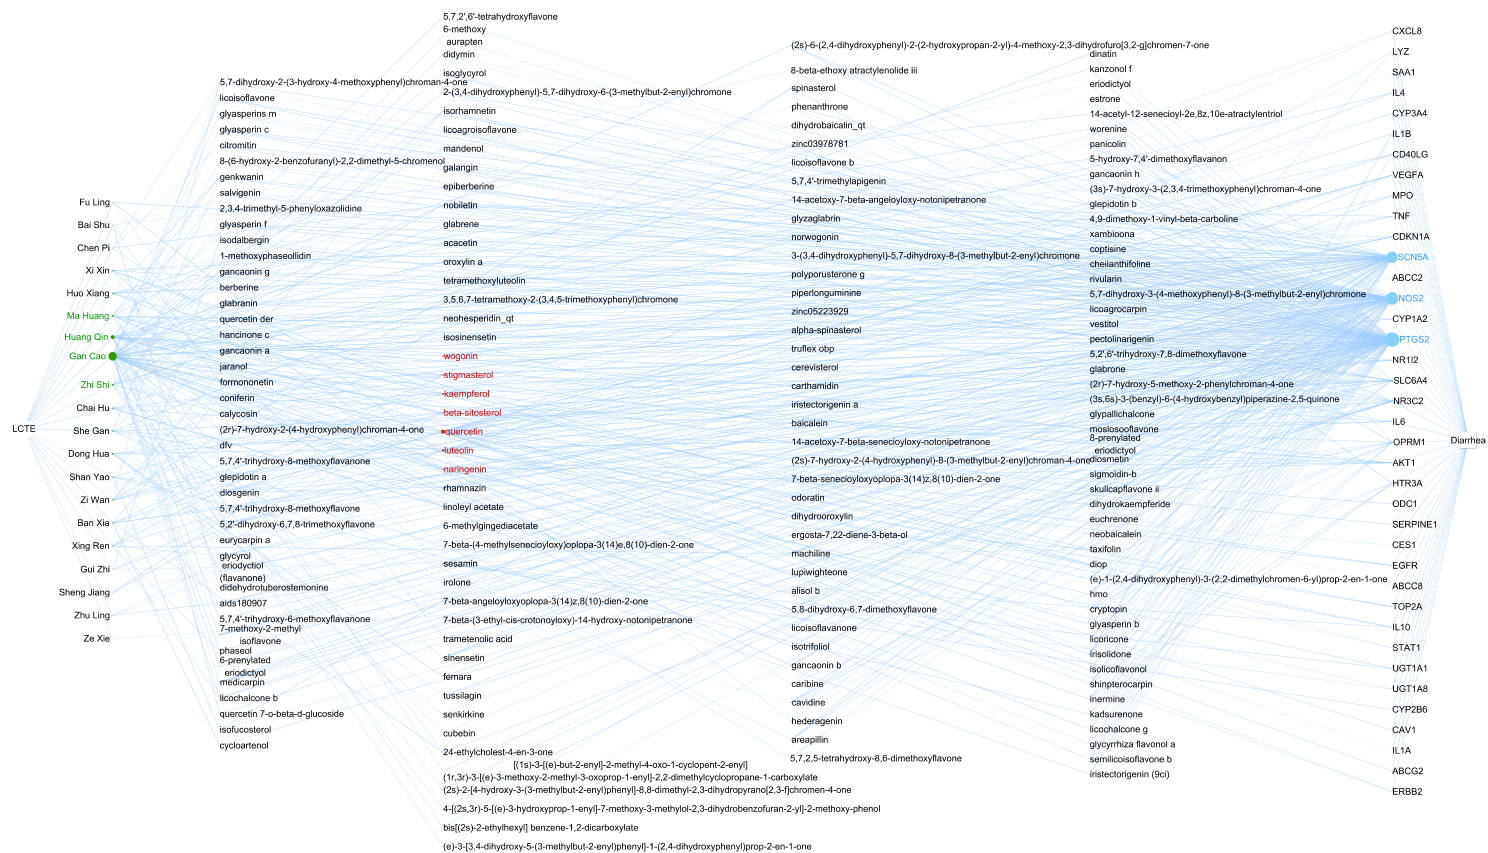

Fig S8. The network of plants, chemical compounds and target proteins for relieving diarrhea by LCTE

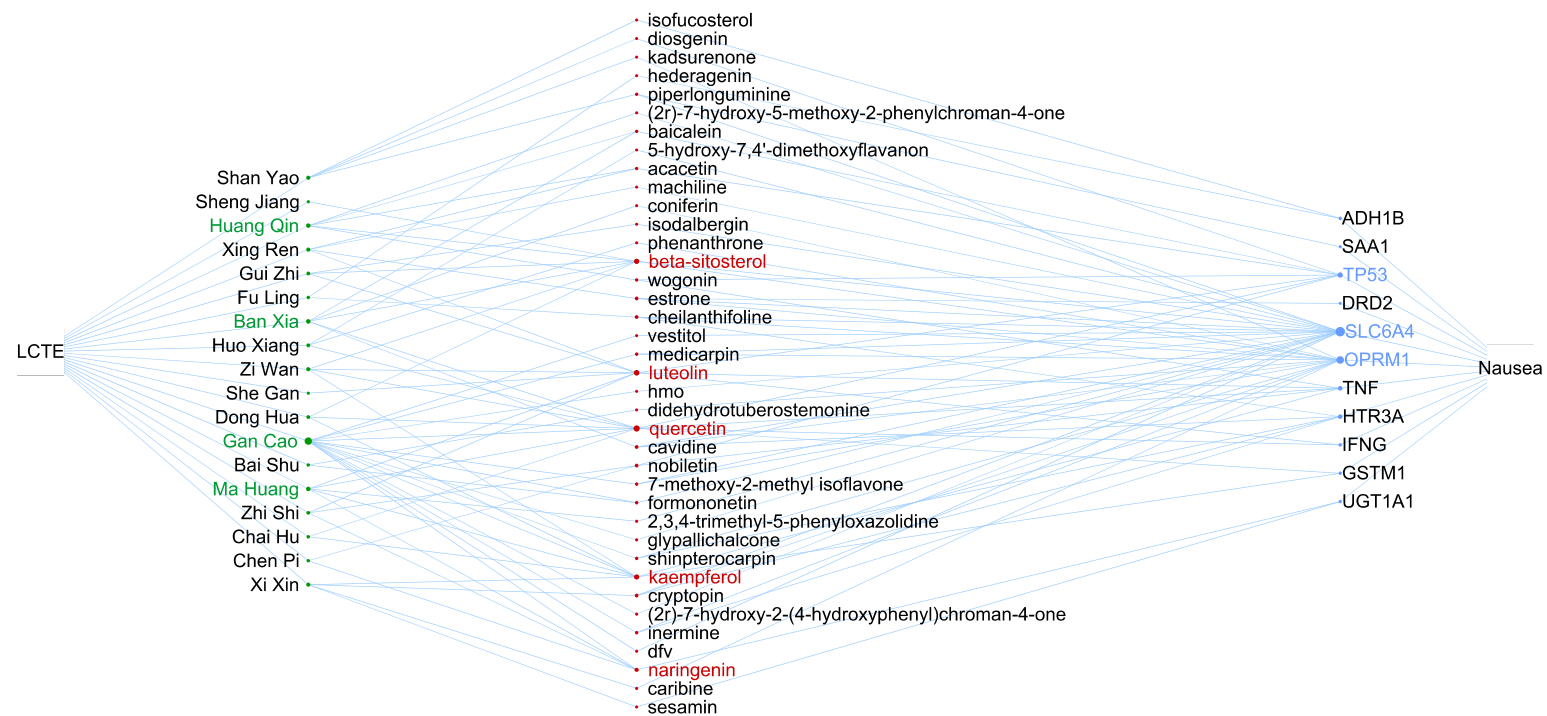

Fig S9. The network of plants, chemical compounds and target proteins for relieving nausea by LCTE

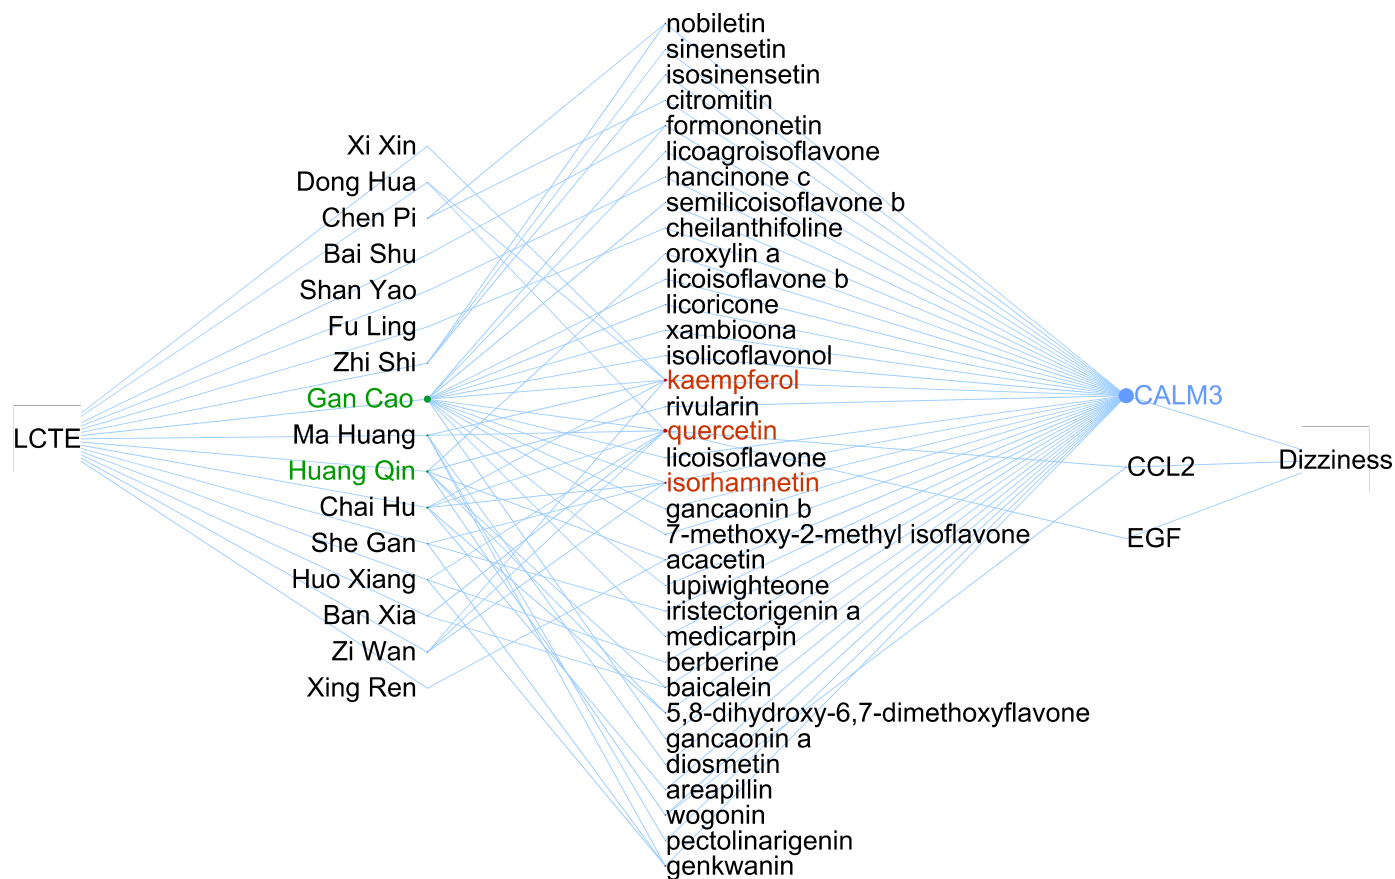

Fig S10. The network of plants, chemical compounds and target proteins for relieving dizziness by LCTE

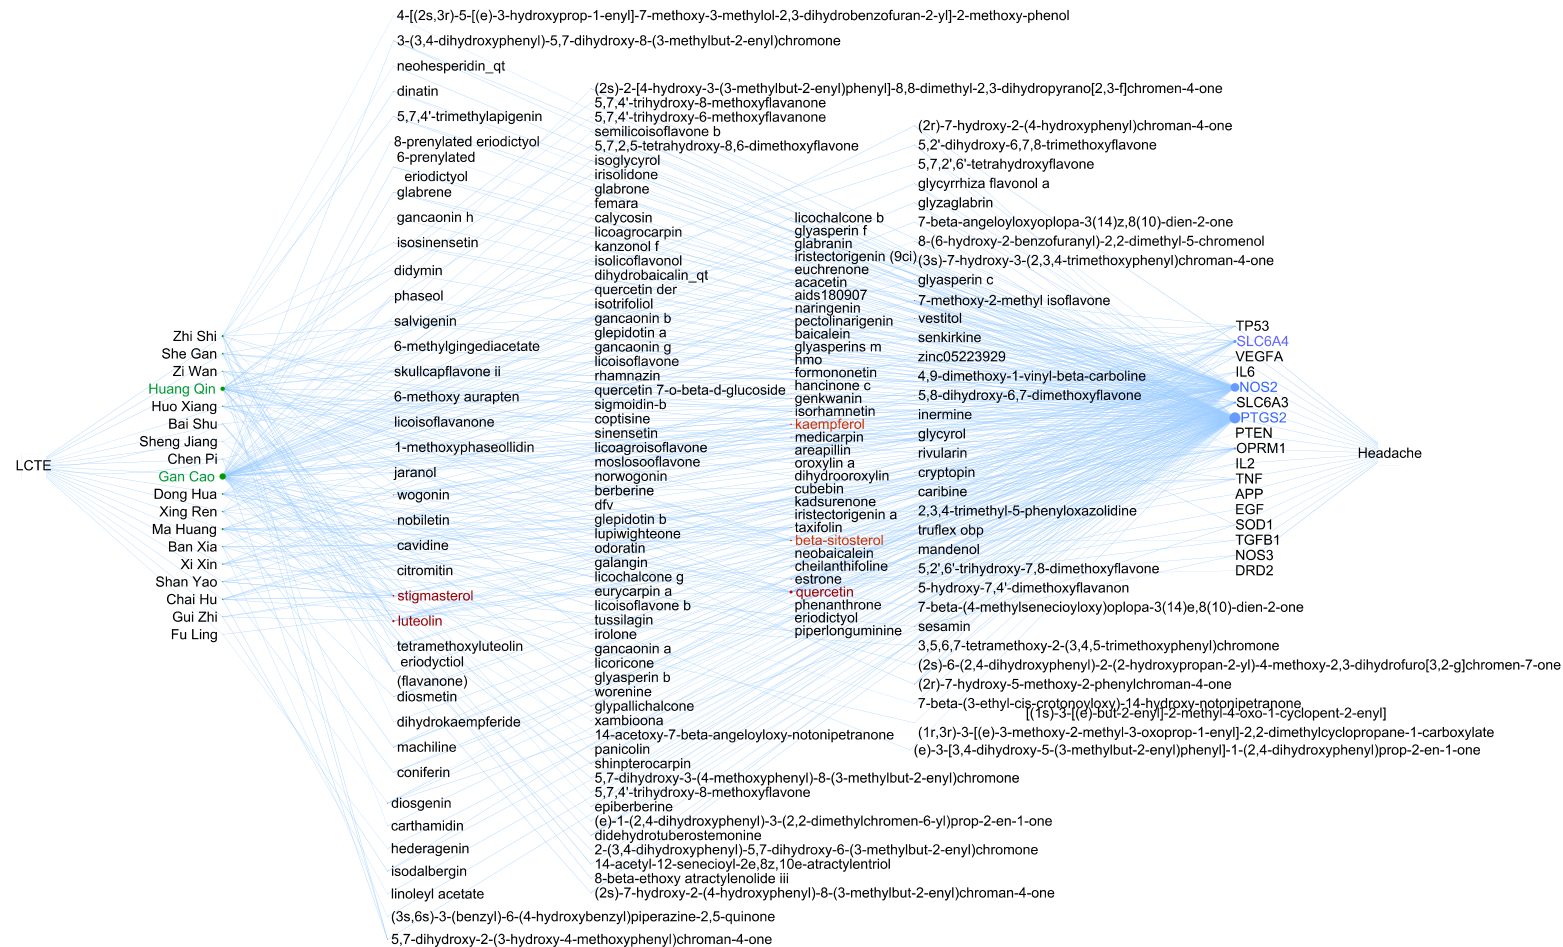

Fig S11. The network of plants, chemical compounds and target proteins for relieving headache by LCTE

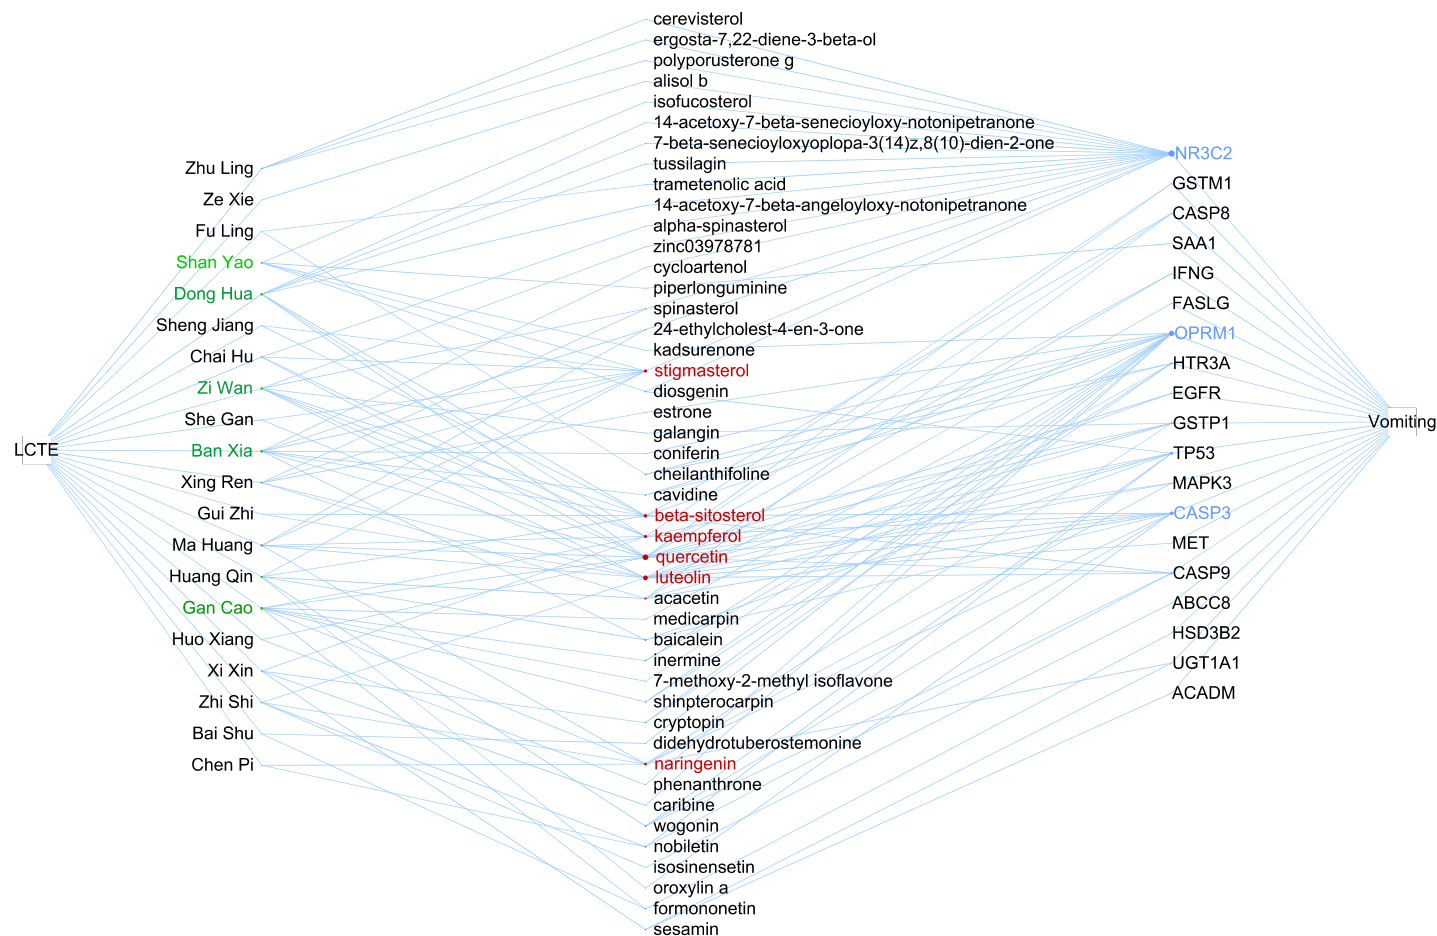

Fig S12. The network of plants, chemical compounds and target proteins for relieving vomiting by LCTE



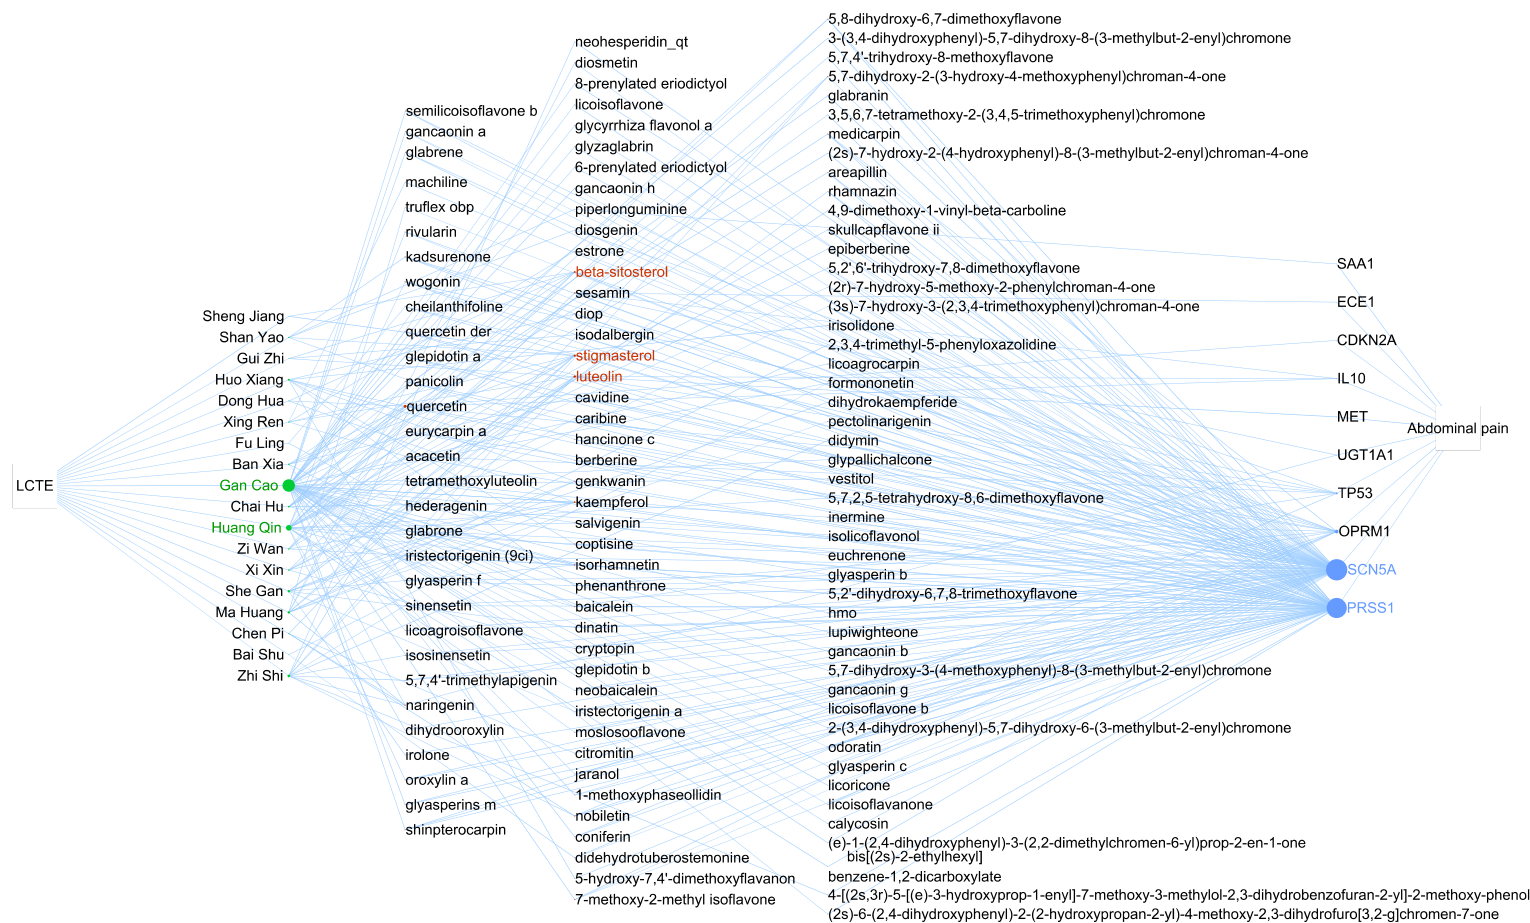

Fig S13. The network of plants, chemical compounds and target proteins for relieving abdominal pain by LCTE

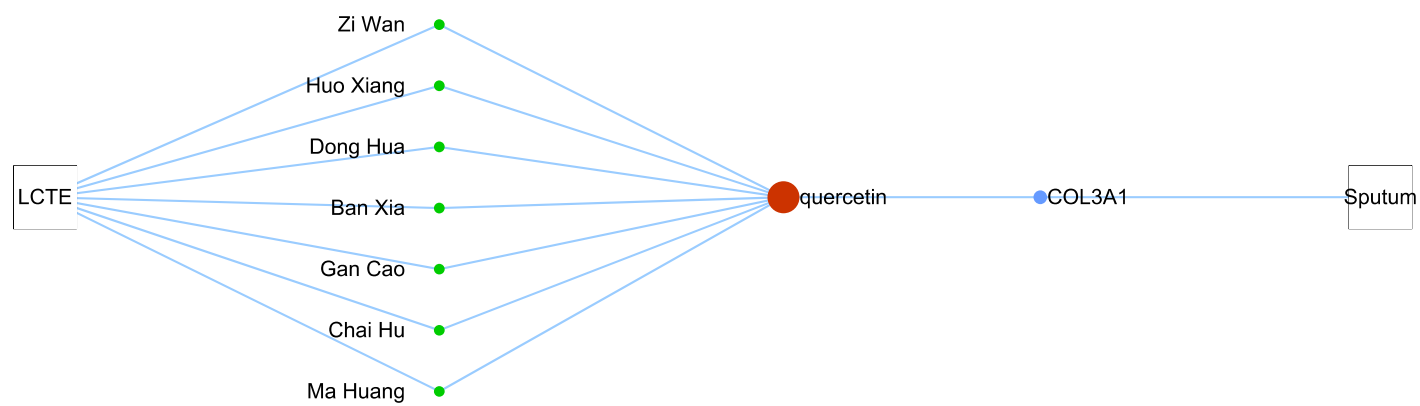

Fig S14. The network of plants, chemical compounds and target proteins for relieving sputum by LCTE

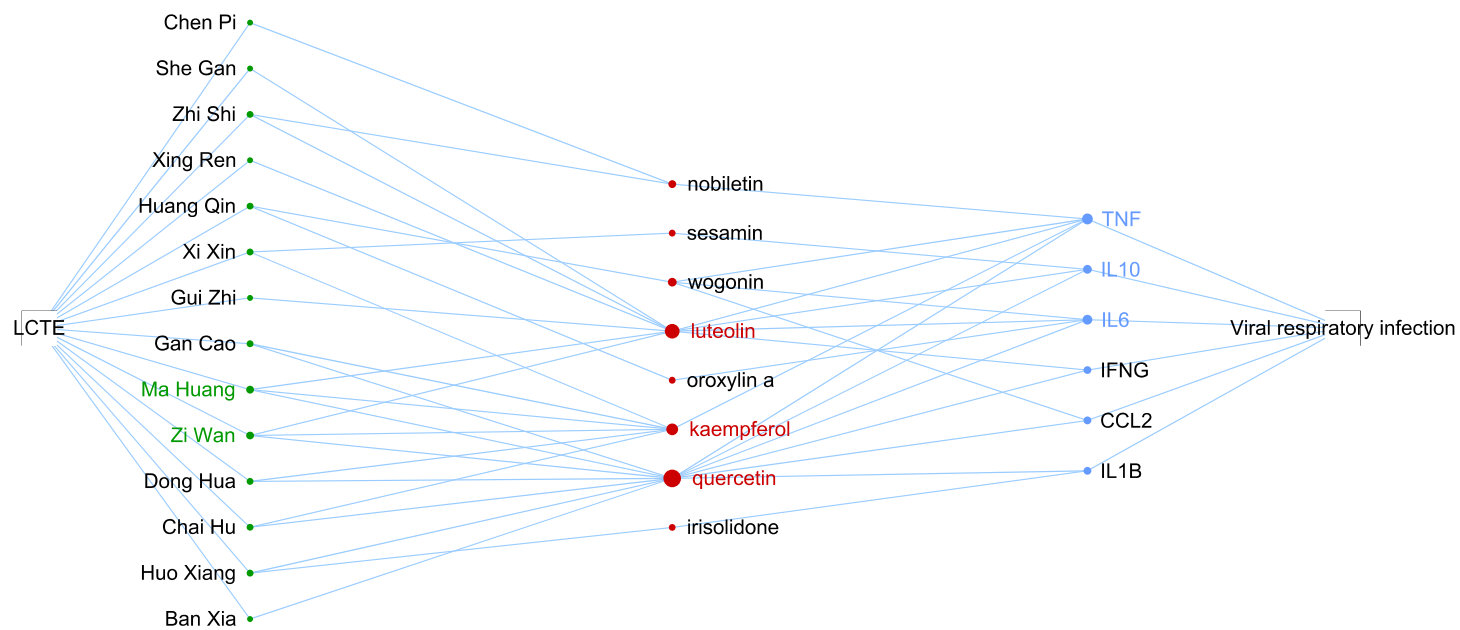

Fig S15. The network of plants, chemical compounds and target proteins for treating viral respiratory infection by LCTE
