# Supplementary material
Source: publisher figshare collection journal article supplement (https://springernature.figshare.com/articles/dataset/_/12063372)
Supplement: Supplementary file 2 [file 1]

Archive with 9 entries (9 files):
- Supplementary Table 1.xlsx
- Supplementary Table 2.xlsx
- Supplementary Table 3.xlsx
- Supplementary Table 4.xlsx
- Supplementary Table 5.xlsx
- Supplementary Table 6.xlsx
- Supplementary Table 7.xlsx
- Supplementary Table 8.xlsx
- supplementary_Doc and Fig S1-S15.pdf
