# Supplementary material
Source: publisher figshare collection journal article supplement (https://springernature.figshare.com/articles/dataset/_/12063372)
Supplement: Supplementary file 2 [file 1 › Supplementary Table 1.xlsx]

## Sheet: plant_ingredients
Table S1. Chemical compounds contained in each LCTE’s plant
Chinese name	Latin name	Compound.name
Bai Shu	Rhizoma Atractylodis Macrocephalae	didehydrotuberostemonine
Bai Shu	Rhizoma Atractylodis Macrocephalae	formononetin
Bai Shu	Rhizoma Atractylodis Macrocephalae	14-acetyl-12-senecioyl-2e,8z,10e-atractylentriol
Bai Shu	Rhizoma Atractylodis Macrocephalae	(3s,8s,9s,10r,13r,14s,17r)-10,13-dimethyl-17-[(2r,5s)-5-propan-2-yloctan-2-yl]-2,3,4,7,8,9,11,12,14,15,16,17-dodecahydro-1h-cyclopenta[a]phenanthren-3-ol
Bai Shu	Rhizoma Atractylodis Macrocephalae	8-beta-ethoxy atractylenolide iii
Bai Shu	Rhizoma Atractylodis Macrocephalae	stemonine
Ban Xia	Rhizoma Pinelliae	24-ethylcholest-4-en-3-one
Ban Xia	Rhizoma Pinelliae	baicalein
Ban Xia	Rhizoma Pinelliae	quercetin
Ban Xia	Rhizoma Pinelliae	10,13-eicosadienoic
Ban Xia	Rhizoma Pinelliae	cavidine
Ban Xia	Rhizoma Pinelliae	beta-sitosterol
Ban Xia	Rhizoma Pinelliae	stigmasterol
Ban Xia	Rhizoma Pinelliae	gondoic acid
Ban Xia	Rhizoma Pinelliae	coniferin
Ban Xia	Rhizoma Pinelliae	(3s,6s)-3-(benzyl)-6-(4-hydroxybenzyl)piperazine-2,5-quinone
Ban Xia	Rhizoma Pinelliae	cycloartenol
Chai Hu	Radix Bupleuri	5,8-dihydroxy-6,7-dimethoxyflavone
Chai Hu	Radix Bupleuri	quercetin
Chai Hu	Radix Bupleuri	kaempferol
Chai Hu	Radix Bupleuri	3,5,6,7-tetramethoxy-2-(3,4,5-trimethoxyphenyl)chromone
Chai Hu	Radix Bupleuri	linoleyl acetate
Chai Hu	Radix Bupleuri	isorhamnetin
Chai Hu	Radix Bupleuri	stigmasterol
Chai Hu	Radix Bupleuri	alpha-spinasterol
Chai Hu	Radix Bupleuri	areapillin
Chai Hu	Radix Bupleuri	cubebin
Chen Pi	Pericarpium Citri Reticulatae	naringenin
Chen Pi	Pericarpium Citri Reticulatae	nobiletin
Chen Pi	Pericarpium Citri Reticulatae	5,7-dihydroxy-2-(3-hydroxy-4-methoxyphenyl)chroman-4-one
Chen Pi	Pericarpium Citri Reticulatae	citromitin
Dong Hua	Farfarae Flos	femara
Dong Hua	Farfarae Flos	tussilagin
Dong Hua	Farfarae Flos	7-beta-angeloyloxyoplopa-3(14)z,8(10)-dien-2-one
Dong Hua	Farfarae Flos	7-beta-(4-methylsenecioyloxy)oplopa-3(14)e,8(10)-dien-2-one
Dong Hua	Farfarae Flos	14-acetoxy-7-beta-senecioyloxy-notonipetranone
Dong Hua	Farfarae Flos	beta-sitosterol
Dong Hua	Farfarae Flos	kaempferol
Dong Hua	Farfarae Flos	quercetin
Dong Hua	Farfarae Flos	senkirkine
Dong Hua	Farfarae Flos	14-acetoxy-7-beta-angeloyloxy-notonipetranone
Dong Hua	Farfarae Flos	7-beta-(3-ethyl-cis-crotonoyloxy)-14-hydroxy-notonipetranone
Dong Hua	Farfarae Flos	la-7-beta-di(4-methulsenecioyloxy) oplopa-3(14)z,8(10)-dien-2-one
Dong Hua	Farfarae Flos	methyl butyric acid tussilagin ester
Dong Hua	Farfarae Flos	7-beta-senecioyloxyoplopa-3(14)z,8(10)-dien-2-one
Dong Hua	Farfarae Flos	7-beta-(3-ethyl-cis-crotonoyloxy)-la-(2-methyl butyryloxy)-3,14-dehydro-z-notonipetralactone
Fu Ling	Poria	ergosterol peroxide
Fu Ling	Poria	trametenolic acid
Fu Ling	Poria	hederagenin
Fu Ling	Poria	ergosta-7,22e-dien-3-beta-ol
Fu Ling	Poria	cheilanthifoline
Gan Cao	Radix Glycyrrhizae	lupiwighteone
Gan Cao	Radix Glycyrrhizae	xambioona
Gan Cao	Radix Glycyrrhizae	glabranin
Gan Cao	Radix Glycyrrhizae	licoagroisoflavone
Gan Cao	Radix Glycyrrhizae	licocoumarone
Gan Cao	Radix Glycyrrhizae	licoisoflavone
Gan Cao	Radix Glycyrrhizae	quercetin
Gan Cao	Radix Glycyrrhizae	licoricone
Gan Cao	Radix Glycyrrhizae	formononetin
Gan Cao	Radix Glycyrrhizae	medicarpin
Gan Cao	Radix Glycyrrhizae	naringenin
Gan Cao	Radix Glycyrrhizae	glyzaglabrin
Gan Cao	Radix Glycyrrhizae	semilicoisoflavone b
Gan Cao	Radix Glycyrrhizae	isolicoflavonol
Gan Cao	Radix Glycyrrhizae	isorhamnetin
Gan Cao	Radix Glycyrrhizae	isotrifoliol
Gan Cao	Radix Glycyrrhizae	kaempferol
Gan Cao	Radix Glycyrrhizae	glepidotin b
Gan Cao	Radix Glycyrrhizae	glypallichalcone
Gan Cao	Radix Glycyrrhizae	licoisoflavone b
Gan Cao	Radix Glycyrrhizae	7-methoxy-2-methyl isoflavone
Gan Cao	Radix Glycyrrhizae	licochalcone g
Gan Cao	Radix Glycyrrhizae	gancaonin a
Gan Cao	Radix Glycyrrhizae	gancaonin b
Gan Cao	Radix Glycyrrhizae	2-(3,4-dihydroxyphenyl)-5,7-dihydroxy-6-(3-methylbut-2-enyl)chromone
Gan Cao	Radix Glycyrrhizae	isoglycyrol
Gan Cao	Radix Glycyrrhizae	shinpterocarpin
Gan Cao	Radix Glycyrrhizae	(e)-3-[3,4-dihydroxy-5-(3-methylbut-2-enyl)phenyl]-1-(2,4-dihydroxyphenyl)prop-2-en-1-one
Gan Cao	Radix Glycyrrhizae	kanzonol f
Gan Cao	Radix Glycyrrhizae	glabrene
Gan Cao	Radix Glycyrrhizae	glabrone
Gan Cao	Radix Glycyrrhizae	1,3-dihydroxy-9-methoxy-6-benzofurano[3,2-c]chromenone
Gan Cao	Radix Glycyrrhizae	8-(6-hydroxy-2-benzofuranyl)-2,2-dimethyl-5-chromenol
Gan Cao	Radix Glycyrrhizae	licochalcone b
Gan Cao	Radix Glycyrrhizae	sigmoidin-b
Gan Cao	Radix Glycyrrhizae	3-(3,4-dihydroxyphenyl)-5,7-dihydroxy-8-(3-methylbut-2-enyl)chromone
Gan Cao	Radix Glycyrrhizae	5,7-dihydroxy-3-(4-methoxyphenyl)-8-(3-methylbut-2-enyl)chromone
Gan Cao	Radix Glycyrrhizae	hmo
Gan Cao	Radix Glycyrrhizae	licoisoflavanone
Gan Cao	Radix Glycyrrhizae	quercetin der
Gan Cao	Radix Glycyrrhizae	icos-5-enoic acid
Gan Cao	Radix Glycyrrhizae	(e)-1-(2,4-dihydroxyphenyl)-3-(2,2-dimethylchromen-6-yl)prop-2-en-1-one
Gan Cao	Radix Glycyrrhizae	6-prenylated eriodictyol
Gan Cao	Radix Glycyrrhizae	inermine
Gan Cao	Radix Glycyrrhizae	dfv
Gan Cao	Radix Glycyrrhizae	1,3-dihydroxy-8,9-dimethoxy-6-benzofurano[3,2-c]chromenone
Gan Cao	Radix Glycyrrhizae	eurycarpin a
Gan Cao	Radix Glycyrrhizae	jaranol
Gan Cao	Radix Glycyrrhizae	calycosin
Gan Cao	Radix Glycyrrhizae	(2s)-2-[4-hydroxy-3-(3-methylbut-2-enyl)phenyl]-8,8-dimethyl-2,3-dihydropyrano[2,3-f]chromen-4-one
Gan Cao	Radix Glycyrrhizae	euchrenone
Gan Cao	Radix Glycyrrhizae	glyasperin b
Gan Cao	Radix Glycyrrhizae	glyasperin f
Gan Cao	Radix Glycyrrhizae	glyasperin c
Gan Cao	Radix Glycyrrhizae	gadelaidic acid
Gan Cao	Radix Glycyrrhizae	(2s)-6-(2,4-dihydroxyphenyl)-2-(2-hydroxypropan-2-yl)-4-methoxy-2,3-dihydrofuro[3,2-g]chromen-7-one
Gan Cao	Radix Glycyrrhizae	glepidotin a
Gan Cao	Radix Glycyrrhizae	8-prenylated eriodictyol
Gan Cao	Radix Glycyrrhizae	(2r)-7-hydroxy-2-(4-hydroxyphenyl)chroman-4-one
Gan Cao	Radix Glycyrrhizae	betulinic acid
Gan Cao	Radix Glycyrrhizae	glycyrol
Gan Cao	Radix Glycyrrhizae	gancaonin h
Gan Cao	Radix Glycyrrhizae	phaseol
Gan Cao	Radix Glycyrrhizae	(2s)-7-hydroxy-2-(4-hydroxyphenyl)-8-(3-methylbut-2-enyl)chroman-4-one
Gan Cao	Radix Glycyrrhizae	glycyrrhiza flavonol a
Gan Cao	Radix Glycyrrhizae	1-methoxyphaseollidin
Gan Cao	Radix Glycyrrhizae	gancaonin g
Gan Cao	Radix Glycyrrhizae	licoagrocarpin
Gan Cao	Radix Glycyrrhizae	glyasperins m
Gan Cao	Radix Glycyrrhizae	vestitol
Gan Cao	Radix Glycyrrhizae	odoratin
Gui Zhi	Cinnamomi Ramulus	luteolin
Gui Zhi	Cinnamomi Ramulus	isodalbergin
Gui Zhi	Cinnamomi Ramulus	beta-sitosterol
Gui Zhi	Cinnamomi Ramulus	taxifolin
Huang Qin	Radix Scutellariae	5,7,4'-trihydroxy-6-methoxyflavanone
Huang Qin	Radix Scutellariae	5,7,4'-trihydroxy-8-methoxyflavanone
Huang Qin	Radix Scutellariae	dihydrooroxylin
Huang Qin	Radix Scutellariae	beta-sitosterol
Huang Qin	Radix Scutellariae	11,13-eicosadienoic acid, methyl ester
Huang Qin	Radix Scutellariae	5,7,2',6'-tetrahydroxyflavone
Huang Qin	Radix Scutellariae	epiberberine
Huang Qin	Radix Scutellariae	panicolin
Huang Qin	Radix Scutellariae	neobaicalein
Huang Qin	Radix Scutellariae	5,8-dihydroxy-6,7-dimethoxyflavone
Huang Qin	Radix Scutellariae	skullcapflavone ii
Huang Qin	Radix Scutellariae	5,2'-dihydroxy-6,7,8-trimethoxyflavone
Huang Qin	Radix Scutellariae	stigmasterol
Huang Qin	Radix Scutellariae	bis[(2s)-2-ethylhexyl] benzene-1,2-dicarboxylate
Huang Qin	Radix Scutellariae	acacetin
Huang Qin	Radix Scutellariae	rivularin
Huang Qin	Radix Scutellariae	moslosooflavone
Huang Qin	Radix Scutellariae	wogonin
Huang Qin	Radix Scutellariae	5,2',6'-trihydroxy-7,8-dimethoxyflavone
Huang Qin	Radix Scutellariae	norwogonin
Huang Qin	Radix Scutellariae	baicalein
Huang Qin	Radix Scutellariae	5,7,4'-trihydroxy-8-methoxyflavone
Huang Qin	Radix Scutellariae	5,7,2,5-tetrahydroxy-8,6-dimethoxyflavone
Huang Qin	Radix Scutellariae	(2r)-7-hydroxy-5-methoxy-2-phenylchroman-4-one
Huang Qin	Radix Scutellariae	diop
Huang Qin	Radix Scutellariae	coptisine
Huang Qin	Radix Scutellariae	salvigenin
Huang Qin	Radix Scutellariae	carthamidin
Huang Qin	Radix Scutellariae	eriodyctiol (flavanone)
Huang Qin	Radix Scutellariae	dihydrobaicalin_qt
Huang Qin	Radix Scutellariae	oroxylin a
Huo Xiang	Pogostemon Cablin	genkwanin
Huo Xiang	Pogostemon Cablin	worenine
Huo Xiang	Pogostemon Cablin	magnograndiolide
Huo Xiang	Pogostemon Cablin	quercetin
Huo Xiang	Pogostemon Cablin	coptisine
Huo Xiang	Pogostemon Cablin	5-hydroxy-7,4'-dimethoxyflavanon
Huo Xiang	Pogostemon Cablin	quercetin 7-o-beta-d-glucoside
Huo Xiang	Pogostemon Cablin	irisolidone
Huo Xiang	Pogostemon Cablin	berberine
Huo Xiang	Pogostemon Cablin	diop
Huo Xiang	Pogostemon Cablin	phenanthrone
Ma Huang	Herba Ephedrae	campest-5-en-3-beta-ol
Ma Huang	Herba Ephedrae	truflex obp
Ma Huang	Herba Ephedrae	poriferast-5-en-3beta-ol
Ma Huang	Herba Ephedrae	naringenin
Ma Huang	Herba Ephedrae	2,3,4-trimethyl-5-phenyloxazolidine
Ma Huang	Herba Ephedrae	taxifolin
Ma Huang	Herba Ephedrae	diosmetin
Ma Huang	Herba Ephedrae	stigmasterol
Ma Huang	Herba Ephedrae	pectolinarigenin
Ma Huang	Herba Ephedrae	quercetin
Ma Huang	Herba Ephedrae	genkwanin
Ma Huang	Herba Ephedrae	mandenol
Ma Huang	Herba Ephedrae	eriodictyol
Ma Huang	Herba Ephedrae	24-ethylcholest-4-en-3-one
Ma Huang	Herba Ephedrae	luteolin
Ma Huang	Herba Ephedrae	kaempferol
Shan Yao	Rhizoma Dioscoreae	piperlonguminine
Shan Yao	Rhizoma Dioscoreae	hancinone c
Shan Yao	Rhizoma Dioscoreae	campesterol
Shan Yao	Rhizoma Dioscoreae	stigmasterol
Shan Yao	Rhizoma Dioscoreae	24-methylcholest-5-enyl-3belta-o-glucopyranoside_qt
Shan Yao	Rhizoma Dioscoreae	isofucosterol
Shan Yao	Rhizoma Dioscoreae	taxifolin
Shan Yao	Rhizoma Dioscoreae	kadsurenone
Shan Yao	Rhizoma Dioscoreae	aids180907
Shan Yao	Rhizoma Dioscoreae	diosgenin
Shan Yao	Rhizoma Dioscoreae	dioscoreside c_qt
She Gan	Rhizoma Belamcandae	genkwanin
She Gan	Rhizoma Belamcandae	stigmasterol
She Gan	Rhizoma Belamcandae	dinatin
She Gan	Rhizoma Belamcandae	luteolin
She Gan	Rhizoma Belamcandae	iristectorigenin a
She Gan	Rhizoma Belamcandae	dihydrokaempferide
She Gan	Rhizoma Belamcandae	iristectorigenin (9ci)
She Gan	Rhizoma Belamcandae	isorhamnetin
She Gan	Rhizoma Belamcandae	irolone
She Gan	Rhizoma Belamcandae	rhamnazin
Sheng Jiang	Rhizoma Zingiberis Recens	stigmasterol
Sheng Jiang	Rhizoma Zingiberis Recens	poriferast-5-en-3beta-ol
Sheng Jiang	Rhizoma Zingiberis Recens	beta-sitosterol
Sheng Jiang	Rhizoma Zingiberis Recens	6-methylgingediacetate
Xi Xin	Herba Asari	zinc05223929
Xi Xin	Herba Asari	[(1s)-3-[(e)-but-2-enyl]-2-methyl-4-oxo-1-cyclopent-2-enyl] (1r,3r)-3-[(e)-3-methoxy-2-methyl-3-oxoprop-1-enyl]-2,2-dimethylcyclopropane-1-carboxylate
Xi Xin	Herba Asari	(3s)-7-hydroxy-3-(2,3,4-trimethoxyphenyl)chroman-4-one
Xi Xin	Herba Asari	cryptopin
Xi Xin	Herba Asari	caribine
Xi Xin	Herba Asari	4,9-dimethoxy-1-vinyl-beta-carboline
Xi Xin	Herba Asari	sesamin
Xi Xin	Herba Asari	kaempferol
Xing Ren	Semen Armeniacae Amarum	11,14-eicosadienoic acid
Xing Ren	Semen Armeniacae Amarum	estrone
Xing Ren	Semen Armeniacae Amarum	luteolin
Xing Ren	Semen Armeniacae Amarum	stigmasterol
Xing Ren	Semen Armeniacae Amarum	gondoic acid
Xing Ren	Semen Armeniacae Amarum	betulinic acid
Xing Ren	Semen Armeniacae Amarum	licochalcone b
Xing Ren	Semen Armeniacae Amarum	glycyrol
Xing Ren	Semen Armeniacae Amarum	spinasterol
Xing Ren	Semen Armeniacae Amarum	acacetin
Xing Ren	Semen Armeniacae Amarum	phaseol
Xing Ren	Semen Armeniacae Amarum	machiline
Ze Xie	Rhizoma Alismatis	alisol c monoacetate
Ze Xie	Rhizoma Alismatis	[(1s,3r)-1-[(2r)-3,3-dimethyloxiran-2-yl]-3-[(5r,8s,9s,10s,11s,14r)-11-hydroxy-4,4,8,10,14-pentamethyl-3-oxo-1,2,5,6,7,9,11,12,15,16-decahydrocyclopenta[a]phenanthren-17-yl]butyl] acetate
Ze Xie	Rhizoma Alismatis	16-beta-methoxyalisol b monoacetate
Ze Xie	Rhizoma Alismatis	1-monolinolein
Ze Xie	Rhizoma Alismatis	alisol b
Zhi Shi	Fructus Aurantii Immaturus	luteolin
Zhi Shi	Fructus Aurantii Immaturus	naringenin
Zhi Shi	Fructus Aurantii Immaturus	nobiletin
Zhi Shi	Fructus Aurantii Immaturus	isosinensetin
Zhi Shi	Fructus Aurantii Immaturus	5,7-dihydroxy-2-(3-hydroxy-4-methoxyphenyl)chroman-4-one
Zhi Shi	Fructus Aurantii Immaturus	didymin
Zhi Shi	Fructus Aurantii Immaturus	tetramethoxyluteolin
Zhi Shi	Fructus Aurantii Immaturus	sinensetin
Zhi Shi	Fructus Aurantii Immaturus	4-[(2s,3r)-5-[(e)-3-hydroxyprop-1-enyl]-7-methoxy-3-methylol-2,3-dihydrobenzofuran-2-yl]-2-methoxy-phenol
Zhi Shi	Fructus Aurantii Immaturus	5,7,4'-trimethylapigenin
Zhi Shi	Fructus Aurantii Immaturus	neohesperidin_qt
Zhi Shi	Fructus Aurantii Immaturus	eriodyctiol (flavanone)
Zhi Shi	Fructus Aurantii Immaturus	6-methoxy aurapten
Zhu Ling	Polyporus Umbellatus	(22e,24r)-ergosta-7,22-dien-3-one
Zhu Ling	Polyporus Umbellatus	ergosta-7,22e-dien-3-beta-ol
Zhu Ling	Polyporus Umbellatus	polyporusterone g
Zhu Ling	Polyporus Umbellatus	ergosta-7,22-diene-3-beta-ol
Zhu Ling	Polyporus Umbellatus	cerevisterol
Zhu Ling	Polyporus Umbellatus	ergosta-5,7,22-trien-3-ol
Zhu Ling	Polyporus Umbellatus	ergosta-7,22-dien-3-one
Zi Wan	Radix Asteria	zinc03978781
Zi Wan	Radix Asteria	galangin
Zi Wan	Radix Asteria	beta-sitosterol
Zi Wan	Radix Asteria	5,7-dihydroxy-2-(3-hydroxy-4-methoxyphenyl)chroman-4-one
Zi Wan	Radix Asteria	quercetin
Zi Wan	Radix Asteria	isorhamnetin
Zi Wan	Radix Asteria	spinasterol
Zi Wan	Radix Asteria	kaempferol
Zi Wan	Radix Asteria	luteolin
