# Supplementary material
Source: publisher figshare collection journal article supplement (https://springernature.figshare.com/articles/dataset/_/12063372)
Supplement: Supplementary file 2 [file 1 › Supplementary Table 2.xlsx]

## Sheet: Ingredient.target
Table S2. The protein targets of each chemical ingredient in LCTE
Ingredients	Targets
didehydrotuberostemonine	AR
didehydrotuberostemonine	NOS2
didehydrotuberostemonine	OPRM1
didehydrotuberostemonine	PTGS1
didehydrotuberostemonine	CHRM1
didehydrotuberostemonine	PTGS2
didehydrotuberostemonine	SCN5A
formononetin	PTGS2
formononetin	RXRA
formononetin	SIRT1
formononetin	HSD3B2
formononetin	IL4
formononetin	JUN
formononetin	MAOB
formononetin	MT-ND6
formononetin	NOS2
formononetin	PPARG
formononetin	PRSS1
formononetin	PTGS1
formononetin	CHRM1
formononetin	ESR1
formononetin	ESR2
formononetin	GSK3B
formononetin	HSD3B1
formononetin	ACHE
formononetin	ADRA1A
formononetin	ADRB2
formononetin	AR
formononetin	ATP5B
formononetin	CALM3
formononetin	CCNA2
formononetin	CDK2
formononetin	SLC6A3
formononetin	SLC6A4
stemonine	AR
24-ethylcholest-4-en-3-one	NR3C2
baicalein	CALM3
baicalein	CYCS
baicalein	EGLN1
baicalein	MPO
baicalein	NCOA1
baicalein	PRSS1
baicalein	PTGS1
baicalein	PTGS2
baicalein	TP53
baicalein	VEGFA
baicalein	CDC2
baicalein	AHR
baicalein	AR
baicalein	BCL2
quercetin	BIRC5
quercetin	CASP3
quercetin	CASP8
quercetin	CAT
quercetin	ADRB2
quercetin	AHR
quercetin	AKR1B1
quercetin	AKT1
quercetin	ALOX5
quercetin	AR
quercetin	BCL2
quercetin	BCL2L1
quercetin	COL1A1
quercetin	BMP2
quercetin	CRP
quercetin	CTSD
quercetin	CXCL10
quercetin	CAV1
quercetin	CCL2
quercetin	CCND1
quercetin	CD40LG
quercetin	CDKN1A
quercetin	CDKN2A
quercetin	CHEK2
quercetin	CHUK
quercetin	EIF6
quercetin	COL3A1
quercetin	ERBB3
quercetin	ESR1
quercetin	ESR2
quercetin	F3
quercetin	FOS
quercetin	GJA1
quercetin	GSK3B
quercetin	GSTM1
quercetin	GSTM2
quercetin	GSTP1
quercetin	HIF1A
quercetin	HMOX1
quercetin	HSF1
quercetin	HSPA5
quercetin	HSPB1
quercetin	ICAM1
quercetin	IFNG
quercetin	IGF2
quercetin	IGFBP3
quercetin	IL10
quercetin	IL1A
quercetin	IL1B
quercetin	IL2
quercetin	IL6
quercetin	INSR
quercetin	IRF1
quercetin	JUN
quercetin	KCNH2
quercetin	MAOB
quercetin	MAPK1
quercetin	CXCL8
quercetin	CYP1A1
quercetin	CYP1A2
quercetin	CYP1B1
quercetin	CYP3A4
quercetin	DUOX2
quercetin	EGF
quercetin	EGFR
quercetin	TOP1
quercetin	ERBB2
quercetin	TP53
quercetin	ABCG2
quercetin	ACACA
quercetin	ACHE
quercetin	ACPP
quercetin	ELK1
quercetin	BAX
quercetin	DIO1
quercetin	E2F1
quercetin	E2F2
quercetin	CLDN4
quercetin	CASP9
quercetin	RUNX1T1
quercetin	HAS2
quercetin	HK2
quercetin	CXCL2
quercetin	NFE2L2
quercetin	NKX3-1
quercetin	CXCL11
quercetin	PCOLCE
quercetin	PSMD3
quercetin	SLC2A4
quercetin	SOD3
quercetin	SPP1
quercetin	AHSA1
quercetin	DCAF5
quercetin	HERC5
quercetin	PRXC1A
quercetin	gyrB
quercetin	CDC2
quercetin	SCN5A
quercetin	MAPK3
quercetin	MGAM
quercetin	MMP1
quercetin	MMP2
quercetin	MMP3
quercetin	MMP9
quercetin	MPO
quercetin	MYC
quercetin	NCF1
quercetin	NFKBIA
quercetin	NOS2
quercetin	NOS3
quercetin	NPEPPS
quercetin	NQO1
quercetin	NR1I2
quercetin	NR1I3
quercetin	ODC1
quercetin	PARP1
quercetin	PLAT
quercetin	PLAU
quercetin	PON1
quercetin	POR
quercetin	PPARA
quercetin	PPARD
quercetin	PPARG
quercetin	PRKCA
quercetin	PRKCB
quercetin	PRSS1
quercetin	PTEN
quercetin	PTGER3
quercetin	PTGS1
quercetin	PTGS2
quercetin	RAF1
quercetin	RASA1
quercetin	RASSF1
quercetin	RB1
quercetin	RELA
quercetin	RUNX2
quercetin	RXRA
quercetin	VEGFA
quercetin	SELE
quercetin	SERPINE1
quercetin	SOD1
quercetin	STAT1
quercetin	SULT1E1
quercetin	TGFB1
quercetin	THBD
quercetin	TNF
quercetin	TOP2A
quercetin	CCNB1
quercetin	VCAM1
quercetin	XDH
5,8-dihydroxy-6,7-dimethoxyflavone	AR
5,8-dihydroxy-6,7-dimethoxyflavone	CALM3
5,8-dihydroxy-6,7-dimethoxyflavone	CDK2
5,8-dihydroxy-6,7-dimethoxyflavone	ESR1
5,8-dihydroxy-6,7-dimethoxyflavone	ESR2
5,8-dihydroxy-6,7-dimethoxyflavone	GSK3B
5,8-dihydroxy-6,7-dimethoxyflavone	NCOA1
5,8-dihydroxy-6,7-dimethoxyflavone	NOS2
5,8-dihydroxy-6,7-dimethoxyflavone	SCN5A
5,8-dihydroxy-6,7-dimethoxyflavone	PRSS1
5,8-dihydroxy-6,7-dimethoxyflavone	PTGS1
5,8-dihydroxy-6,7-dimethoxyflavone	PTGS2
areapillin	SCN5A
areapillin	ESR2
areapillin	IGHG1
areapillin	AR
areapillin	CALM3
areapillin	PTGS2
areapillin	NCOA1
areapillin	NOS2
areapillin	PRSS1
cubebin	PTGS2
cubebin	PTGS1
cubebin	ADRB2
isorhamnetin	PTGS1
isorhamnetin	CALM3
isorhamnetin	ESR1
isorhamnetin	ESR2
isorhamnetin	CCNA2
isorhamnetin	CDK2
isorhamnetin	PRSS1
isorhamnetin	ACHE
isorhamnetin	AKR1B1
isorhamnetin	AR
isorhamnetin	RELA
isorhamnetin	XDH
isorhamnetin	OLR1
isorhamnetin	GRIA2
isorhamnetin	GSK3B
isorhamnetin	MAOB
isorhamnetin	NCF1
isorhamnetin	NCOA1
isorhamnetin	NOS2
isorhamnetin	PTGS2
kaempferol	HMOX1
kaempferol	CYP1A1
kaempferol	IKBKB
kaempferol	NOS2
kaempferol	NR1I2
kaempferol	NR1I3
kaempferol	PGR
kaempferol	PPARG
kaempferol	PPP3CA
kaempferol	PRSS1
kaempferol	PTGS1
kaempferol	PTGS2
kaempferol	RELA
kaempferol	SELE
kaempferol	SLC6A2
kaempferol	STAT1
kaempferol	TNF
kaempferol	VCAM1
kaempferol	XDH
kaempferol	BAX
kaempferol	DIO1
kaempferol	HAS2
kaempferol	PSMD3
kaempferol	SLC2A4
kaempferol	SLPI
kaempferol	AHSA1
kaempferol	PRXC1A
kaempferol	CDC2
kaempferol	CYP1A2
kaempferol	CYP1B1
kaempferol	CYP3A4
kaempferol	ESR1
kaempferol	ESR2
kaempferol	GSTM1
kaempferol	GSTM2
kaempferol	GSTP1
kaempferol	ALOX5
kaempferol	ICAM1
kaempferol	BCL2
kaempferol	INSR
kaempferol	JUN
kaempferol	MAPK8
kaempferol	MMP1
kaempferol	AKR1C3
kaempferol	AKT1
kaempferol	ACHE
kaempferol	AHR
kaempferol	CALM3
kaempferol	CASP3
kaempferol	AR
kaempferol	CHRM1
citromitin	CALM3
citromitin	KCNH2
citromitin	PTGS2
citromitin	SCN5A
naringenin	SOAT2
naringenin	PPARG
naringenin	SOD1
naringenin	NOS2
naringenin	ABAT
naringenin	ABCC1
naringenin	AKR1C1
naringenin	SREBF1
naringenin	UGT1A1
naringenin	ADIPOQ
naringenin	PLB1
naringenin	MAPK3
naringenin	MTTP
naringenin	CAT
naringenin	PPARA
naringenin	CYP19A1
naringenin	PTGS1
naringenin	FASN
naringenin	GOT1
naringenin	GSR
naringenin	GSTP1
naringenin	HMGCR
naringenin	LDLR
naringenin	MAPK1
naringenin	BCL2
naringenin	CASP3
naringenin	PTGS2
naringenin	CES1
naringenin	SOAT1
naringenin	ESR1
naringenin	AKT1
naringenin	RELA
naringenin	BAD
naringenin	APOB
naringenin	ESR2
nobiletin	NOS2
nobiletin	PRSS1
nobiletin	PTGS1
nobiletin	PLA2G4A
nobiletin	PPARG
nobiletin	SCN5A
nobiletin	TNF
nobiletin	PTGS2
nobiletin	RAF1
nobiletin	MAPK8
nobiletin	MMP9
nobiletin	TIMP1
nobiletin	BCL2
nobiletin	BMP2
nobiletin	CALM3
nobiletin	CD163
nobiletin	CDKN1A
nobiletin	CREB1
nobiletin	EPHB2
nobiletin	ESR1
nobiletin	TP53
nobiletin	BAX
nobiletin	CASP9
nobiletin	RASGRF2
nobiletin	AR
nobiletin	ESR2
nobiletin	GSK3B
nobiletin	JUN
nobiletin	KCNH2
senkirkine	PTGS2
cheilanthifoline	KCNH2
cheilanthifoline	CHRM1
cheilanthifoline	DRD3
cheilanthifoline	HTR3A
cheilanthifoline	PTGS2
cheilanthifoline	OPRD1
cheilanthifoline	OPRM1
cheilanthifoline	PTGS1
cheilanthifoline	ADRB2
cheilanthifoline	CALM3
cheilanthifoline	RXRA
cheilanthifoline	SCN5A
cheilanthifoline	SLC6A3
cheilanthifoline	SLC6A4
7-methoxy-2-methyl isoflavone	SLC6A3
7-methoxy-2-methyl isoflavone	SLC6A4
7-methoxy-2-methyl isoflavone	RXRA
7-methoxy-2-methyl isoflavone	SCN5A
7-methoxy-2-methyl isoflavone	MAOB
7-methoxy-2-methyl isoflavone	NCOA1
7-methoxy-2-methyl isoflavone	NOS2
7-methoxy-2-methyl isoflavone	OPRM1
7-methoxy-2-methyl isoflavone	PRSS1
7-methoxy-2-methyl isoflavone	PTGS1
7-methoxy-2-methyl isoflavone	PTGS2
7-methoxy-2-methyl isoflavone	CCNA2
7-methoxy-2-methyl isoflavone	CDK2
7-methoxy-2-methyl isoflavone	CHRM1
7-methoxy-2-methyl isoflavone	ESR1
7-methoxy-2-methyl isoflavone	ESR2
7-methoxy-2-methyl isoflavone	IGHG1
7-methoxy-2-methyl isoflavone	ADRB2
7-methoxy-2-methyl isoflavone	AR
7-methoxy-2-methyl isoflavone	ACHE
7-methoxy-2-methyl isoflavone	ADRB1
7-methoxy-2-methyl isoflavone	GSK3B
7-methoxy-2-methyl isoflavone	CALM3
gancaonin a	CCNA2
gancaonin a	ESR1
gancaonin a	PRSS1
gancaonin a	CALM3
gancaonin a	ACHE
gancaonin a	AR
gancaonin a	ESR2
gancaonin a	GSK3B
gancaonin a	NOS2
gancaonin a	PTGS2
gancaonin a	SCN5A
gancaonin b	CCNA2
gancaonin b	AR
gancaonin b	ESR1
gancaonin b	GSK3B
gancaonin b	CALM3
gancaonin b	KDR
gancaonin b	ESR2
gancaonin b	ADRB2
gancaonin b	PTGS2
gancaonin b	NOS2
gancaonin b	PRSS1
glyzaglabrin	PRSS1
glyzaglabrin	NOS2
glyzaglabrin	AR
glyzaglabrin	CCNA2
glyzaglabrin	PTGS1
glyzaglabrin	PTGS2
glyzaglabrin	ESR2
glyzaglabrin	GSK3B
glyzaglabrin	CDK2
glyzaglabrin	ESR1
isoglycyrol	Gene symbol
isoglycyrol	GSK3B
isoglycyrol	NOS2
isoglycyrol	AR
isoglycyrol	ESR1
isoglycyrol	PTGS2
isolicoflavonol	CDK2
isolicoflavonol	NOS2
isolicoflavonol	ESR1
isolicoflavonol	GSK3B
isolicoflavonol	CCNA2
isolicoflavonol	AR
isolicoflavonol	CALM3
isolicoflavonol	PRSS1
isolicoflavonol	PTGS2
isotrifoliol	NOS2
isotrifoliol	PTGS2
isotrifoliol	ESR2
isotrifoliol	GSK3B
isotrifoliol	CCNA2
isotrifoliol	CDK2
isotrifoliol	ESR1
isotrifoliol	AR
licoagroisoflavone	CALM3
licoagroisoflavone	AR
licoagroisoflavone	ESR1
licoagroisoflavone	CDK2
licoagroisoflavone	PRSS1
licoagroisoflavone	PTGS2
licoagroisoflavone	CCNA2
licoagroisoflavone	NOS2
licoagroisoflavone	SCN5A
licoagroisoflavone	GSK3B
licoagroisoflavone	ESR2
licocoumarone	AR
licocoumarone	ESR2
licocoumarone	GSK3B
licocoumarone	CCNA2
licocoumarone	CDK2
licocoumarone	ESR1
licoisoflavone	AR
licoisoflavone	PRSS1
licoisoflavone	CALM3
licoisoflavone	CCNA2
licoisoflavone	NOS2
licoisoflavone	CDK2
licoisoflavone	ESR1
licoisoflavone	KDR
licoisoflavone	PTGS2
licoisoflavone b	CALM3
licoisoflavone b	ESR1
licoisoflavone b	PTGS2
licoisoflavone b	CDK2
licoisoflavone b	PRSS1
licoisoflavone b	CCNA2
licoisoflavone b	ACHE
licoisoflavone b	AR
licoisoflavone b	ESR2
licoisoflavone b	GSK3B
licoisoflavone b	NOS2
licoricone	PTGS2
licoricone	KDR
licoricone	NOS2
licoricone	CALM3
licoricone	ESR1
licoricone	KCNH2
licoricone	PRSS1
licoricone	AR
lupiwighteone	GSK3B
lupiwighteone	AR
lupiwighteone	CDK2
lupiwighteone	ESR1
lupiwighteone	CALM3
lupiwighteone	CCNA2
lupiwighteone	PRSS1
lupiwighteone	PTGS2
lupiwighteone	ESR2
lupiwighteone	NOS2
lupiwighteone	SCN5A
medicarpin	ESR1
medicarpin	PRSS1
medicarpin	CHRM1
medicarpin	PTGS2
medicarpin	RXRA
medicarpin	SCN5A
medicarpin	PTGS1
medicarpin	SLC6A3
medicarpin	SLC6A4
medicarpin	OPRD1
medicarpin	ESR2
medicarpin	MAPK10
medicarpin	NOS2
medicarpin	ADRA1A
medicarpin	OPRM1
medicarpin	CALM3
medicarpin	Gene symbol
medicarpin	CDK2
medicarpin	ADRB2
medicarpin	CCNA2
semilicoisoflavone b	PTGS2
semilicoisoflavone b	SCN5A
semilicoisoflavone b	ACHE
semilicoisoflavone b	NOS2
semilicoisoflavone b	PRSS1
semilicoisoflavone b	CALM3
semilicoisoflavone b	CDK2
semilicoisoflavone b	ESR1
semilicoisoflavone b	AR
semilicoisoflavone b	GSK3B
xambioona	CALM3
xambioona	ESR1
xambioona	NOS2
xambioona	PTGS2
xambioona	ESR2
isodalbergin	RXRA
isodalbergin	ADRB2
isodalbergin	PTGS1
isodalbergin	SCN5A
isodalbergin	SLC6A4
isodalbergin	PTGS2
luteolin	XDH
luteolin	CCNB1
luteolin	CASP9
luteolin	SLC2A4
luteolin	PTGES
luteolin	NUF2
luteolin	ERBB2
luteolin	GSTP1
luteolin	HMOX1
luteolin	ICAM1
luteolin	IFNG
luteolin	IL10
luteolin	IL2
luteolin	IL4
luteolin	IL6
luteolin	INSR
luteolin	JUN
luteolin	MAPK1
luteolin	MAPK3
luteolin	MCL1
luteolin	MDM2
luteolin	MET
luteolin	MMP1
luteolin	MMP2
luteolin	MMP9
luteolin	NFKBIA
luteolin	NOS2
luteolin	PCNA
luteolin	PPARG
luteolin	PRSS1
luteolin	PTGS1
luteolin	PTGS2
luteolin	ADCY2
luteolin	AKT1
luteolin	APP
luteolin	AR
luteolin	BCL2L1
luteolin	BIRC5
luteolin	CASP3
luteolin	CASP7
luteolin	CCND1
luteolin	CD40LG
luteolin	CDK2
luteolin	CDK4
luteolin	CDKN1A
luteolin	EGFR
luteolin	RB1
luteolin	RELA
luteolin	TNF
luteolin	TOP1
luteolin	TOP2A
luteolin	TP53
luteolin	TYR
luteolin	VEGFA
luteolin	XIAP
taxifolin	MTTP
taxifolin	RELA
taxifolin	DGAT2
taxifolin	PTGS1
taxifolin	PTGS2
taxifolin	RXRA
taxifolin	ICAM1
taxifolin	AKR1B1
taxifolin	MAC1
taxifolin	APOB
taxifolin	NOS2
acacetin	AR
acacetin	BCL2
acacetin	CALM3
acacetin	ADRB2
acacetin	FASLG
acacetin	FASN
acacetin	NCOA1
acacetin	NOS2
acacetin	PRSS1
acacetin	PTGS1
acacetin	PTGS2
acacetin	RELA
acacetin	CASP3
acacetin	CASP8
acacetin	CDK2
acacetin	CDKN1A
acacetin	CYP19A1
acacetin	TP53
acacetin	BAX
coptisine	AR
coptisine	CCND1
coptisine	MAOA
coptisine	NOS2
coptisine	ESR1
coptisine	KCNH2
coptisine	PTGS2
coptisine	SCN5A
coptisine	PRSS1
coptisine	PTGS1
norwogonin	PTGS1
norwogonin	PTGS2
norwogonin	AR
norwogonin	CDK2
norwogonin	NOS2
oroxylin a	ADRB2
oroxylin a	BCL2
oroxylin a	CALM3
oroxylin a	CASP3
oroxylin a	AR
oroxylin a	CYP2C9
oroxylin a	IL6
oroxylin a	NCOA1
oroxylin a	NOS2
oroxylin a	PRSS1
oroxylin a	PTGS1
oroxylin a	PTGS2
oroxylin a	RXRA
oroxylin a	SCN5A
oroxylin a	CCNB1
oroxylin a	CCNA2
oroxylin a	CDK7
oroxylin a	CYP1A2
oroxylin a	CDC2
rivularin	KCNH2
rivularin	KDR
rivularin	NOS2
rivularin	PRSS1
rivularin	PTGS1
rivularin	NCOA1
rivularin	RXRA
rivularin	SCN5A
rivularin	AR
rivularin	PTGS2
rivularin	CALM3
rivularin	ESR2
rivularin	CA2
wogonin	BAX
wogonin	CASP9
wogonin	TEP1
wogonin	AHSA1
wogonin	BBC3
wogonin	PRSS1
wogonin	PTGER3
wogonin	PTGS1
wogonin	PTGS2
wogonin	RELA
wogonin	SCN5A
wogonin	TNF
wogonin	TP53
wogonin	KDR
wogonin	MCL1
wogonin	MMP1
wogonin	NOS2
wogonin	PRKCD
wogonin	CCND1
wogonin	CDK2
wogonin	CDKN1A
wogonin	CXCL8
wogonin	EIF6
wogonin	RXRA
wogonin	ADRB2
wogonin	AKT1
wogonin	AR
wogonin	BCL2
wogonin	CALM3
wogonin	CASP3
wogonin	CCL2
wogonin	IL6
wogonin	ESR1
wogonin	FN1
wogonin	GSK3B
wogonin	JUN
berberine	ADRB2
berberine	AR
berberine	CALM3
berberine	ESR1
berberine	KCNH2
berberine	PTGS2
berberine	RXRA
berberine	SCN5A
berberine	PRSS1
berberine	PTGS1
berberine	NOS2
berberine	PDE10A
genkwanin	ESR2
genkwanin	RXRA
genkwanin	NCOA1
genkwanin	CALM3
genkwanin	AR
genkwanin	PRSS1
genkwanin	NOS2
genkwanin	PTGS2
genkwanin	PTGS1
magnograndiolide	GRIA2
worenine	AR
worenine	ESR1
worenine	NOS2
worenine	PTGS1
worenine	PTGS2
2,3,4-trimethyl-5-phenyloxazolidine	SLC6A3
2,3,4-trimethyl-5-phenyloxazolidine	SLC6A4
2,3,4-trimethyl-5-phenyloxazolidine	SLC6A2
2,3,4-trimethyl-5-phenyloxazolidine	SCN5A
2,3,4-trimethyl-5-phenyloxazolidine	CHRM1
2,3,4-trimethyl-5-phenyloxazolidine	ADRA1A
2,3,4-trimethyl-5-phenyloxazolidine	PTGS2
2,3,4-trimethyl-5-phenyloxazolidine	ADRB1
2,3,4-trimethyl-5-phenyloxazolidine	ADRB2
2,3,4-trimethyl-5-phenyloxazolidine	ADRA2A
diosmetin	CALM3
diosmetin	NOS2
diosmetin	PRSS1
diosmetin	PTGS1
diosmetin	NCOA1
diosmetin	PTGS2
eriodictyol	NFE2L2
eriodictyol	HMOX1
eriodictyol	NQO1
eriodictyol	PTGS1
eriodictyol	PTGS2
mandenol	PTGS1
mandenol	PTGS2
pectolinarigenin	SCN5A
pectolinarigenin	NOS2
pectolinarigenin	PTGS2
pectolinarigenin	ACHE
pectolinarigenin	CALM3
pectolinarigenin	PRSS1
pectolinarigenin	PTGS1
pectolinarigenin	IGHG1
pectolinarigenin	NCOA1
hancinone c	CHRM1
hancinone c	CALM3
hancinone c	NCOA1
hancinone c	ESR1
hancinone c	ESR2
hancinone c	KCNH2
hancinone c	PTGS2
hancinone c	SCN5A
hancinone c	NOS2
hancinone c	PRSS1
piperlonguminine	MAOB
piperlonguminine	RXRA
piperlonguminine	SLC6A4
piperlonguminine	CHRM1
piperlonguminine	SLC6A3
piperlonguminine	ADRB2
iristectorigenin a	AR
iristectorigenin a	CALM3
iristectorigenin a	CCNA2
iristectorigenin a	CDK2
iristectorigenin a	ESR1
iristectorigenin a	ESR2
iristectorigenin a	GSK3B
iristectorigenin a	PTGS1
iristectorigenin a	PTGS2
iristectorigenin a	SCN5A
iristectorigenin a	NOS2
iristectorigenin a	PRSS1
sesamin	PTGS2
sesamin	SCN5A
sesamin	NOS3
sesamin	NOX1
sesamin	ACLY
sesamin	NOX3
sesamin	SREBF1
sesamin	UGT1A1
sesamin	HADHB
sesamin	IL10
sesamin	NOS2
sesamin	ACACA
sesamin	ACADM
sesamin	ACOX1
sesamin	AUH
sesamin	CCND1
sesamin	CYP2B6
sesamin	DECR1
sesamin	ECE1
sesamin	DCI
sesamin	FASN
sesamin	G6PD
sesamin	EHHADH
alisol c monoacetate	NR3C1
isosinensetin	ACHE
isosinensetin	CALM3
isosinensetin	ADRB2
isosinensetin	AR
isosinensetin	CA2
isosinensetin	NCOA1
isosinensetin	ESR1
isosinensetin	ESR2
isosinensetin	KCNH2
isosinensetin	SCN5A
isosinensetin	PTGS2
isosinensetin	NOS2
isosinensetin	PRSS1
isosinensetin	PTGS1
sinensetin	ACHE
sinensetin	ADRB2
sinensetin	AR
sinensetin	CALM3
sinensetin	ESR2
sinensetin	KCNH2
sinensetin	NCOA1
sinensetin	NOS2
sinensetin	SCN5A
sinensetin	PRSS1
sinensetin	PTGS1
sinensetin	PTGS2
galangin	AHR
galangin	AR
galangin	BCL2
galangin	CCNA2
galangin	CDK4
galangin	CYP1A1
galangin	GSTP1
galangin	NOS2
galangin	CDC2
galangin	PTGS1
galangin	PTGS2
galangin	CCND3
galangin	HERC5
24-ethylcholest-4-en-4-one	PGR
kaempferol	HSP90AA1
kaempferol	NCOA2
kaempferol	DPP4
kaempferol	SERPIND1
kaempferol	CHRM2
kaempferol	ADRA1B
kaempferol	GABRA1
kaempferol	TOP2B
kaempferol	F7
kaempferol	PCP4
kaempferol	CD40LG
kaempferol	CDK1
quercetin	HSP90AA1
quercetin	NCOA2
quercetin	DPP4
quercetin	TOP2B
quercetin	SERPIND1
quercetin	F7
quercetin	GABRA1
quercetin	CDK1
luteolin	HSP90AA1
luteolin	NCOA2
luteolin	DPP4
luteolin	APBA3
stigmasterol	PGR
stigmasterol	NR3C2
stigmasterol	NCOA2
stigmasterol	ADH1C
stigmasterol	RXRA
stigmasterol	NCOA1
stigmasterol	PTGS1
stigmasterol	PTGS2
stigmasterol	ADRA2A
stigmasterol	SLC6A2
stigmasterol	SLC6A3
stigmasterol	ADRB2
stigmasterol	AKR1B1
stigmasterol	PLAU
stigmasterol	LTA4H
stigmasterol	MAOB
stigmasterol	MAOA
stigmasterol	CTRB1
stigmasterol	CHRM3
stigmasterol	CHRM1
stigmasterol	ADRB1
stigmasterol	SCN5A
stigmasterol	HTR2A
stigmasterol	ADRA1D
stigmasterol	CHRM2
stigmasterol	ADRA1B
stigmasterol	GABRA1
24-ethylcholest-4-en-3-one	PGR
poriferast-5-en-3beta-ol	NCOA2
taxifolin	HSP90AA1
naringenin	HSP90AA1
naringenin	LACTBL1
naringenin	UGT1A8
campest-5-en-3-beta-ol	PGR
eriodictyol	HSP90AA1
eriodictyol	NCOA2
genkwanin	DPP4
genkwanin	HSP90AA1
genkwanin	NCOA2
genkwanin	PCP4
genkwanin	CHEK1
pectolinarigenin	ADRA1B
pectolinarigenin	DPP4
pectolinarigenin	NCOA2
pectolinarigenin	PCP4
truflex obp	CHRM1
truflex obp	SCN5A
truflex obp	SLC6A2
truflex obp	ADRA1B
truflex obp	SLC6A3
truflex obp	ADRB2
truflex obp	PDE3A
inermine	PTGS1
inermine	CHRM3
inermine	SCN5A
inermine	PTGS2
inermine	HTR3A
inermine	RXRA
inermine	ADRA1B
inermine	ADRA1D
inermine	PRSS1
inermine	PCP4
inermine	CHRM1
inermine	ADRB2
inermine	OPRM1
inermine	HSP90AA1
dfv	PTGS1
dfv	ESR1
dfv	PTGS2
dfv	RXRA
dfv	ADRB2
dfv	HSP90AA1
dfv	LACTBL1
dfv	MAOB
dfv	SLC6A4
dfv	PKIA
betulinic acid	PGR
glycyrol	NOS2
glycyrol	ESR1
glycyrol	PPARG
glycyrol	PTGS2
glycyrol	KDR
glycyrol	MAPK14
glycyrol	GSK3B
glycyrol	CHEK1
glycyrol	CCNA2
glycyrol	SERPIND1
jaranol	NOS2
jaranol	PTGS1
jaranol	AR
jaranol	SCN5A
jaranol	PTGS2
jaranol	ESR2
jaranol	DPP4
jaranol	HSP90AA1
jaranol	CDK2
jaranol	CHEK1
jaranol	PRSS1
jaranol	NCOA2
jaranol	PCP4
medicarpin	DRD1
medicarpin	CHRM3
medicarpin	CHRM5
medicarpin	CHRM4
medicarpin	HTR2A
medicarpin	ADRA1D
medicarpin	CHRM2
medicarpin	ADRA1B
medicarpin	DPP4
medicarpin	HSP90AA1
medicarpin	PCP4
medicarpin	PDE3A
isorhamnetin	PPARG
isorhamnetin	DPP4
isorhamnetin	MAPK14
isorhamnetin	HSP90AA1
isorhamnetin	NCOA2
isorhamnetin	PCP4
isorhamnetin	PYGM
isorhamnetin	PPARD
isorhamnetin	CHEK1
isorhamnetin	F7
isorhamnetin	SERPIND1
isorhamnetin	GABRA1
lupiwighteone	SERPIND1
lupiwighteone	PPARG
lupiwighteone	F7
lupiwighteone	TOP2B
lupiwighteone	DPP4
lupiwighteone	MAPK14
lupiwighteone	HSP90AA1
lupiwighteone	CHEK1
lupiwighteone	NCOA2
lupiwighteone	PCP4
7-methoxy-2-methyl isoflavone	DRD1
7-methoxy-2-methyl isoflavone	CHRM3
7-methoxy-2-methyl isoflavone	SERPIND1
7-methoxy-2-methyl isoflavone	PPARG
7-methoxy-2-methyl isoflavone	PDE3A
7-methoxy-2-methyl isoflavone	ADRA1B
7-methoxy-2-methyl isoflavone	ADRA1D
7-methoxy-2-methyl isoflavone	GABRA1
7-methoxy-2-methyl isoflavone	DPP4
7-methoxy-2-methyl isoflavone	MAPK14
7-methoxy-2-methyl isoflavone	HSP90AA1
7-methoxy-2-methyl isoflavone	LTA4H
7-methoxy-2-methyl isoflavone	CHEK1
7-methoxy-2-methyl isoflavone	PKIA
7-methoxy-2-methyl isoflavone	PCP4
7-methoxy-2-methyl isoflavone	CHRM5
7-methoxy-2-methyl isoflavone	NCOA2
formononetin	PDE3A
formononetin	ADRA1D
formononetin	DPP4
formononetin	MAPK14
formononetin	HSP90AA1
formononetin	CHEK1
formononetin	PCP4
formononetin	PKIA
formononetin	SERPIND1
formononetin	LACTBL1
calycosin	NOS2
calycosin	PTGS1
calycosin	ESR1
calycosin	AR
calycosin	PPARG
calycosin	PTGS2
calycosin	RXRA
calycosin	PDE3A
calycosin	ESR2
calycosin	DPP4
calycosin	MAPK14
calycosin	GSK3B
calycosin	HSP90AA1
calycosin	CDK2
calycosin	CHEK1
calycosin	PRSS1
calycosin	CCNA2
calycosin	NCOA2
calycosin	PCP4
calycosin	ADRB2
(2s)-2-[4-hydroxy-3-(3-methylbut-2-enyl)phenyl]-8,8-dimethyl-2,3-dihydropyrano[2,3-f]chromen-4-one	NOS2
(2s)-2-[4-hydroxy-3-(3-methylbut-2-enyl)phenyl]-8,8-dimethyl-2,3-dihydropyrano[2,3-f]chromen-4-one	KCNH2
(2s)-2-[4-hydroxy-3-(3-methylbut-2-enyl)phenyl]-8,8-dimethyl-2,3-dihydropyrano[2,3-f]chromen-4-one	ESR1
(2s)-2-[4-hydroxy-3-(3-methylbut-2-enyl)phenyl]-8,8-dimethyl-2,3-dihydropyrano[2,3-f]chromen-4-one	AR
(2s)-2-[4-hydroxy-3-(3-methylbut-2-enyl)phenyl]-8,8-dimethyl-2,3-dihydropyrano[2,3-f]chromen-4-one	PPARG
(2s)-2-[4-hydroxy-3-(3-methylbut-2-enyl)phenyl]-8,8-dimethyl-2,3-dihydropyrano[2,3-f]chromen-4-one	F7
(2s)-2-[4-hydroxy-3-(3-methylbut-2-enyl)phenyl]-8,8-dimethyl-2,3-dihydropyrano[2,3-f]chromen-4-one	PTGS2
(2s)-2-[4-hydroxy-3-(3-methylbut-2-enyl)phenyl]-8,8-dimethyl-2,3-dihydropyrano[2,3-f]chromen-4-one	ESR2
(2s)-2-[4-hydroxy-3-(3-methylbut-2-enyl)phenyl]-8,8-dimethyl-2,3-dihydropyrano[2,3-f]chromen-4-one	MAPK14
(2s)-2-[4-hydroxy-3-(3-methylbut-2-enyl)phenyl]-8,8-dimethyl-2,3-dihydropyrano[2,3-f]chromen-4-one	GSK3B
(2s)-2-[4-hydroxy-3-(3-methylbut-2-enyl)phenyl]-8,8-dimethyl-2,3-dihydropyrano[2,3-f]chromen-4-one	PCP4
euchrenone	NOS2
euchrenone	KCNH2
euchrenone	ESR1
euchrenone	SCN5A
euchrenone	F7
euchrenone	PTGS2
euchrenone	ESR2
euchrenone	ITM2C
euchrenone	PCP4
glyasperin b	NOS2
glyasperin b	SERPIND1
glyasperin b	ESR1
glyasperin b	AR
glyasperin b	PPARG
glyasperin b	F7
glyasperin b	PTGS2
glyasperin b	KDR
glyasperin b	ACHE
glyasperin b	TOP2B
glyasperin b	ESR2
glyasperin b	DPP4
glyasperin b	GSK3B
glyasperin b	HSP90AA1
glyasperin b	CDK2
glyasperin b	PRSS1
glyasperin b	CCNA2
glyasperin b	NCOA2
glyasperin b	PCP4
glyasperin f	NOS2
glyasperin f	PTGS1
glyasperin f	ESR1
glyasperin f	AR
glyasperin f	SCN5A
glyasperin f	PPARG
glyasperin f	F7
glyasperin f	PTGS2
glyasperin f	TOP2B
glyasperin f	ESR2
glyasperin f	MAPK14
glyasperin f	GSK3B
glyasperin f	HSP90AA1
glyasperin f	CDK2
glyasperin f	PRSS1
glyasperin f	CCNA2
glyasperin f	PCP4
glyasperin c	NOS2
glyasperin c	SERPIND1
glyasperin c	KCNH2
glyasperin c	ESR1
glyasperin c	AR
glyasperin c	SCN5A
glyasperin c	PPARG
glyasperin c	F7
glyasperin c	PTGS2
glyasperin c	RXRA
glyasperin c	ACHE
glyasperin c	TOP2B
glyasperin c	ESR2
glyasperin c	DPP4
glyasperin c	MAPK14
glyasperin c	GSK3B
glyasperin c	HSP90AA1
glyasperin c	CDK2
glyasperin c	CHEK1
glyasperin c	PRSS1
glyasperin c	CCNA2
glyasperin c	NCOA2
glyasperin c	PCP4
isotrifoliol	MAPK14
isotrifoliol	HSP90AA1
isotrifoliol	CHEK1
(e)-1-(2,4-dihydroxyphenyl)-3-(2,2-dimethylchromen-6-yl)prop-2-en-1-one	NOS2
(e)-1-(2,4-dihydroxyphenyl)-3-(2,2-dimethylchromen-6-yl)prop-2-en-1-one	PTGS1
(e)-1-(2,4-dihydroxyphenyl)-3-(2,2-dimethylchromen-6-yl)prop-2-en-1-one	ESR1
(e)-1-(2,4-dihydroxyphenyl)-3-(2,2-dimethylchromen-6-yl)prop-2-en-1-one	AR
(e)-1-(2,4-dihydroxyphenyl)-3-(2,2-dimethylchromen-6-yl)prop-2-en-1-one	SCN5A
(e)-1-(2,4-dihydroxyphenyl)-3-(2,2-dimethylchromen-6-yl)prop-2-en-1-one	PPARG
(e)-1-(2,4-dihydroxyphenyl)-3-(2,2-dimethylchromen-6-yl)prop-2-en-1-one	F7
(e)-1-(2,4-dihydroxyphenyl)-3-(2,2-dimethylchromen-6-yl)prop-2-en-1-one	PTGS2
(e)-1-(2,4-dihydroxyphenyl)-3-(2,2-dimethylchromen-6-yl)prop-2-en-1-one	CA2
(e)-1-(2,4-dihydroxyphenyl)-3-(2,2-dimethylchromen-6-yl)prop-2-en-1-one	RXRA
(e)-1-(2,4-dihydroxyphenyl)-3-(2,2-dimethylchromen-6-yl)prop-2-en-1-one	ADRA1B
(e)-1-(2,4-dihydroxyphenyl)-3-(2,2-dimethylchromen-6-yl)prop-2-en-1-one	ESR2
(e)-1-(2,4-dihydroxyphenyl)-3-(2,2-dimethylchromen-6-yl)prop-2-en-1-one	MAPK14
(e)-1-(2,4-dihydroxyphenyl)-3-(2,2-dimethylchromen-6-yl)prop-2-en-1-one	GSK3B
(e)-1-(2,4-dihydroxyphenyl)-3-(2,2-dimethylchromen-6-yl)prop-2-en-1-one	CDK2
(e)-1-(2,4-dihydroxyphenyl)-3-(2,2-dimethylchromen-6-yl)prop-2-en-1-one	CHEK1
(e)-1-(2,4-dihydroxyphenyl)-3-(2,2-dimethylchromen-6-yl)prop-2-en-1-one	CCNA2
(e)-1-(2,4-dihydroxyphenyl)-3-(2,2-dimethylchromen-6-yl)prop-2-en-1-one	NCOA2
(e)-1-(2,4-dihydroxyphenyl)-3-(2,2-dimethylchromen-6-yl)prop-2-en-1-one	PCP4
(2s)-6-(2,4-dihydroxyphenyl)-2-(2-hydroxypropan-2-yl)-4-methoxy-2,3-dihydrofuro[3,2-g]chromen-7-one	NOS2
(2s)-6-(2,4-dihydroxyphenyl)-2-(2-hydroxypropan-2-yl)-4-methoxy-2,3-dihydrofuro[3,2-g]chromen-7-one	SERPIND1
(2s)-6-(2,4-dihydroxyphenyl)-2-(2-hydroxypropan-2-yl)-4-methoxy-2,3-dihydrofuro[3,2-g]chromen-7-one	ESR1
(2s)-6-(2,4-dihydroxyphenyl)-2-(2-hydroxypropan-2-yl)-4-methoxy-2,3-dihydrofuro[3,2-g]chromen-7-one	AR
(2s)-6-(2,4-dihydroxyphenyl)-2-(2-hydroxypropan-2-yl)-4-methoxy-2,3-dihydrofuro[3,2-g]chromen-7-one	PPARG
(2s)-6-(2,4-dihydroxyphenyl)-2-(2-hydroxypropan-2-yl)-4-methoxy-2,3-dihydrofuro[3,2-g]chromen-7-one	F7
(2s)-6-(2,4-dihydroxyphenyl)-2-(2-hydroxypropan-2-yl)-4-methoxy-2,3-dihydrofuro[3,2-g]chromen-7-one	PTGS2
(2s)-6-(2,4-dihydroxyphenyl)-2-(2-hydroxypropan-2-yl)-4-methoxy-2,3-dihydrofuro[3,2-g]chromen-7-one	KDR
(2s)-6-(2,4-dihydroxyphenyl)-2-(2-hydroxypropan-2-yl)-4-methoxy-2,3-dihydrofuro[3,2-g]chromen-7-one	ACHE
(2s)-6-(2,4-dihydroxyphenyl)-2-(2-hydroxypropan-2-yl)-4-methoxy-2,3-dihydrofuro[3,2-g]chromen-7-one	TOP2B
(2s)-6-(2,4-dihydroxyphenyl)-2-(2-hydroxypropan-2-yl)-4-methoxy-2,3-dihydrofuro[3,2-g]chromen-7-one	ESR2
(2s)-6-(2,4-dihydroxyphenyl)-2-(2-hydroxypropan-2-yl)-4-methoxy-2,3-dihydrofuro[3,2-g]chromen-7-one	DPP4
(2s)-6-(2,4-dihydroxyphenyl)-2-(2-hydroxypropan-2-yl)-4-methoxy-2,3-dihydrofuro[3,2-g]chromen-7-one	MAPK14
(2s)-6-(2,4-dihydroxyphenyl)-2-(2-hydroxypropan-2-yl)-4-methoxy-2,3-dihydrofuro[3,2-g]chromen-7-one	GSK3B
(2s)-6-(2,4-dihydroxyphenyl)-2-(2-hydroxypropan-2-yl)-4-methoxy-2,3-dihydrofuro[3,2-g]chromen-7-one	CDK2
(2s)-6-(2,4-dihydroxyphenyl)-2-(2-hydroxypropan-2-yl)-4-methoxy-2,3-dihydrofuro[3,2-g]chromen-7-one	CHEK1
(2s)-6-(2,4-dihydroxyphenyl)-2-(2-hydroxypropan-2-yl)-4-methoxy-2,3-dihydrofuro[3,2-g]chromen-7-one	PRSS1
(2s)-6-(2,4-dihydroxyphenyl)-2-(2-hydroxypropan-2-yl)-4-methoxy-2,3-dihydrofuro[3,2-g]chromen-7-one	CCNA2
(2s)-6-(2,4-dihydroxyphenyl)-2-(2-hydroxypropan-2-yl)-4-methoxy-2,3-dihydrofuro[3,2-g]chromen-7-one	PCP4
semilicoisoflavone b	SERPIND1
semilicoisoflavone b	PPARG
semilicoisoflavone b	F7
semilicoisoflavone b	TOP2B
semilicoisoflavone b	HSP90AA1
semilicoisoflavone b	CHEK1
semilicoisoflavone b	PCP4
glepidotin a	NOS2
glepidotin a	PTGS1
glepidotin a	SERPIND1
glepidotin a	ESR1
glepidotin a	AR
glepidotin a	SCN5A
glepidotin a	PPARG
glepidotin a	F7
glepidotin a	PTGS2
glepidotin a	KDR
glepidotin a	RXRA
glepidotin a	PDE3A
glepidotin a	TOP2B
glepidotin a	DPP4
glepidotin a	MAPK14
glepidotin a	GSK3B
glepidotin a	HSP90AA1
glepidotin a	CDK2
glepidotin a	CHEK1
glepidotin a	PRSS1
glepidotin a	CCNA2
glepidotin a	PCP4
glepidotin b	PTGS1
glepidotin b	ESR1
glepidotin b	SCN5A
glepidotin b	F7
glepidotin b	PTGS2
glepidotin b	RXRA
glepidotin b	PDE3A
glepidotin b	ADRA1B
glepidotin b	TOP2B
glepidotin b	HSP90AA1
glepidotin b	NCOA1
glepidotin b	PCP4
glypallichalcone	NOS2
glypallichalcone	PTGS1
glypallichalcone	CHRM1
glypallichalcone	ESR1
glypallichalcone	AR
glypallichalcone	SCN5A
glypallichalcone	PPARG
glypallichalcone	PTGS2
glypallichalcone	CA2
glypallichalcone	PDE3A
glypallichalcone	ADRA1B
glypallichalcone	SLC6A3
glypallichalcone	ADRB2
glypallichalcone	SLC6A4
glypallichalcone	ESR2
glypallichalcone	MAPK14
glypallichalcone	GSK3B
glypallichalcone	HSP90AA1
glypallichalcone	CDK2
glypallichalcone	LTA4H
glypallichalcone	MAOB
glypallichalcone	CHEK1
glypallichalcone	CCNA2
glypallichalcone	NCOA1
glypallichalcone	PKIA
glypallichalcone	PCP4
8-(6-hydroxy-2-benzofuranyl)-2,2-dimethyl-5-chromenol	NOS2
8-(6-hydroxy-2-benzofuranyl)-2,2-dimethyl-5-chromenol	ESR1
8-(6-hydroxy-2-benzofuranyl)-2,2-dimethyl-5-chromenol	PTGS2
8-(6-hydroxy-2-benzofuranyl)-2,2-dimethyl-5-chromenol	RXRA
8-(6-hydroxy-2-benzofuranyl)-2,2-dimethyl-5-chromenol	HSP90AA1
licochalcone b	NOS2
licochalcone b	PTGS1
licochalcone b	ESR1
licochalcone b	AR
licochalcone b	PPARG
licochalcone b	PTGS2
licochalcone b	CA2
licochalcone b	PDE3A
licochalcone b	ADRB2
licochalcone b	ESR2
licochalcone b	MAPK14
licochalcone b	GSK3B
licochalcone b	HSP90AA1
licochalcone b	CDK2
licochalcone b	CHEK1
licochalcone b	CCNA2
licochalcone b	PCP4
licochalcone g	NOS2
licochalcone g	ESR1
licochalcone g	AR
licochalcone g	PPARG
licochalcone g	F7
licochalcone g	PTGS2
licochalcone g	KDR
licochalcone g	ESR2
licochalcone g	MAPK14
licochalcone g	GSK3B
licochalcone g	HSP90AA1
licochalcone g	CDK2
licochalcone g	CCNA2
licochalcone g	NCOA2
licochalcone g	PCP4
licoricone	SERPIND1
licoricone	PPARG
licoricone	F7
licoricone	TOP2B
licoricone	CHEK1
licoricone	NCOA2
licoricone	PCP4
gancaonin a	SERPIND1
gancaonin a	PPARG
gancaonin a	F7
gancaonin a	TOP2B
gancaonin a	DPP4
gancaonin a	HSP90AA1
gancaonin a	CHEK1
gancaonin a	NCOA2
gancaonin a	PCP4
gancaonin b	SERPIND1
gancaonin b	PPARG
gancaonin b	F7
gancaonin b	ADRA1B
gancaonin b	TOP2B
gancaonin b	DPP4
gancaonin b	HSP90AA1
gancaonin b	CHEK1
gancaonin b	NCOA2
gancaonin b	PCP4
3-(3,4-dihydroxyphenyl)-5,7-dihydroxy-8-(3-methylbut-2-enyl)chromone	NOS2
3-(3,4-dihydroxyphenyl)-5,7-dihydroxy-8-(3-methylbut-2-enyl)chromone	SERPIND1
3-(3,4-dihydroxyphenyl)-5,7-dihydroxy-8-(3-methylbut-2-enyl)chromone	ESR1
3-(3,4-dihydroxyphenyl)-5,7-dihydroxy-8-(3-methylbut-2-enyl)chromone	AR
3-(3,4-dihydroxyphenyl)-5,7-dihydroxy-8-(3-methylbut-2-enyl)chromone	PPARG
3-(3,4-dihydroxyphenyl)-5,7-dihydroxy-8-(3-methylbut-2-enyl)chromone	F7
3-(3,4-dihydroxyphenyl)-5,7-dihydroxy-8-(3-methylbut-2-enyl)chromone	PTGS2
3-(3,4-dihydroxyphenyl)-5,7-dihydroxy-8-(3-methylbut-2-enyl)chromone	MAPK14
3-(3,4-dihydroxyphenyl)-5,7-dihydroxy-8-(3-methylbut-2-enyl)chromone	GSK3B
3-(3,4-dihydroxyphenyl)-5,7-dihydroxy-8-(3-methylbut-2-enyl)chromone	HSP90AA1
3-(3,4-dihydroxyphenyl)-5,7-dihydroxy-8-(3-methylbut-2-enyl)chromone	CDK2
3-(3,4-dihydroxyphenyl)-5,7-dihydroxy-8-(3-methylbut-2-enyl)chromone	CHEK1
3-(3,4-dihydroxyphenyl)-5,7-dihydroxy-8-(3-methylbut-2-enyl)chromone	PRSS1
3-(3,4-dihydroxyphenyl)-5,7-dihydroxy-8-(3-methylbut-2-enyl)chromone	CCNA2
3-(3,4-dihydroxyphenyl)-5,7-dihydroxy-8-(3-methylbut-2-enyl)chromone	NCOA2
3-(3,4-dihydroxyphenyl)-5,7-dihydroxy-8-(3-methylbut-2-enyl)chromone	PCP4
5,7-dihydroxy-3-(4-methoxyphenyl)-8-(3-methylbut-2-enyl)chromone	NOS2
5,7-dihydroxy-3-(4-methoxyphenyl)-8-(3-methylbut-2-enyl)chromone	KCNH2
5,7-dihydroxy-3-(4-methoxyphenyl)-8-(3-methylbut-2-enyl)chromone	ESR1
5,7-dihydroxy-3-(4-methoxyphenyl)-8-(3-methylbut-2-enyl)chromone	AR
5,7-dihydroxy-3-(4-methoxyphenyl)-8-(3-methylbut-2-enyl)chromone	PPARG
5,7-dihydroxy-3-(4-methoxyphenyl)-8-(3-methylbut-2-enyl)chromone	F7
5,7-dihydroxy-3-(4-methoxyphenyl)-8-(3-methylbut-2-enyl)chromone	PTGS2
5,7-dihydroxy-3-(4-methoxyphenyl)-8-(3-methylbut-2-enyl)chromone	TOP2B
5,7-dihydroxy-3-(4-methoxyphenyl)-8-(3-methylbut-2-enyl)chromone	ESR2
5,7-dihydroxy-3-(4-methoxyphenyl)-8-(3-methylbut-2-enyl)chromone	DPP4
5,7-dihydroxy-3-(4-methoxyphenyl)-8-(3-methylbut-2-enyl)chromone	MAPK14
5,7-dihydroxy-3-(4-methoxyphenyl)-8-(3-methylbut-2-enyl)chromone	GSK3B
5,7-dihydroxy-3-(4-methoxyphenyl)-8-(3-methylbut-2-enyl)chromone	HSP90AA1
5,7-dihydroxy-3-(4-methoxyphenyl)-8-(3-methylbut-2-enyl)chromone	CDK2
5,7-dihydroxy-3-(4-methoxyphenyl)-8-(3-methylbut-2-enyl)chromone	CHEK1
5,7-dihydroxy-3-(4-methoxyphenyl)-8-(3-methylbut-2-enyl)chromone	PRSS1
5,7-dihydroxy-3-(4-methoxyphenyl)-8-(3-methylbut-2-enyl)chromone	CCNA2
5,7-dihydroxy-3-(4-methoxyphenyl)-8-(3-methylbut-2-enyl)chromone	NCOA2
5,7-dihydroxy-3-(4-methoxyphenyl)-8-(3-methylbut-2-enyl)chromone	PCP4
2-(3,4-dihydroxyphenyl)-5,7-dihydroxy-6-(3-methylbut-2-enyl)chromone	SERPIND1
2-(3,4-dihydroxyphenyl)-5,7-dihydroxy-6-(3-methylbut-2-enyl)chromone	AR
2-(3,4-dihydroxyphenyl)-5,7-dihydroxy-6-(3-methylbut-2-enyl)chromone	SCN5A
2-(3,4-dihydroxyphenyl)-5,7-dihydroxy-6-(3-methylbut-2-enyl)chromone	PPARG
2-(3,4-dihydroxyphenyl)-5,7-dihydroxy-6-(3-methylbut-2-enyl)chromone	F7
2-(3,4-dihydroxyphenyl)-5,7-dihydroxy-6-(3-methylbut-2-enyl)chromone	PTGS2
2-(3,4-dihydroxyphenyl)-5,7-dihydroxy-6-(3-methylbut-2-enyl)chromone	ADRB2
2-(3,4-dihydroxyphenyl)-5,7-dihydroxy-6-(3-methylbut-2-enyl)chromone	DPP4
2-(3,4-dihydroxyphenyl)-5,7-dihydroxy-6-(3-methylbut-2-enyl)chromone	HSP90AA1
2-(3,4-dihydroxyphenyl)-5,7-dihydroxy-6-(3-methylbut-2-enyl)chromone	CDK2
2-(3,4-dihydroxyphenyl)-5,7-dihydroxy-6-(3-methylbut-2-enyl)chromone	CHEK1
2-(3,4-dihydroxyphenyl)-5,7-dihydroxy-6-(3-methylbut-2-enyl)chromone	PRSS1
2-(3,4-dihydroxyphenyl)-5,7-dihydroxy-6-(3-methylbut-2-enyl)chromone	CCNA2
2-(3,4-dihydroxyphenyl)-5,7-dihydroxy-6-(3-methylbut-2-enyl)chromone	PCP4
licocoumarone	HSP90AA1
licoisoflavone	SERPIND1
licoisoflavone	PPARG
licoisoflavone	F7
licoisoflavone	TOP2B
licoisoflavone	DPP4
licoisoflavone	MAPK14
licoisoflavone	HSP90AA1
licoisoflavone	CHEK1
licoisoflavone	NCOA2
licoisoflavone	PCP4
licoisoflavone b	SERPIND1
licoisoflavone b	PPARG
licoisoflavone b	F7
licoisoflavone b	TOP2B
licoisoflavone b	CHEK1
licoisoflavone b	PCP4
licoisoflavanone	NOS2
licoisoflavanone	PTGS1
licoisoflavanone	ESR1
licoisoflavanone	AR
licoisoflavanone	SCN5A
licoisoflavanone	PPARG
licoisoflavanone	F7
licoisoflavanone	PTGS2
licoisoflavanone	ACHE
licoisoflavanone	TOP2B
licoisoflavanone	ESR2
licoisoflavanone	GSK3B
licoisoflavanone	HSP90AA1
licoisoflavanone	PRSS1
licoisoflavanone	CCNA2
licoisoflavanone	NCOA1
licoisoflavanone	PCP4
shinpterocarpin	NOS2
shinpterocarpin	PTGS1
shinpterocarpin	CHRM3
shinpterocarpin	KCNH2
shinpterocarpin	CHRM1
shinpterocarpin	ESR1
shinpterocarpin	AR
shinpterocarpin	SCN5A
shinpterocarpin	PPARG
shinpterocarpin	PTGS2
shinpterocarpin	HTR3A
shinpterocarpin	RXRA
shinpterocarpin	OPRD1
shinpterocarpin	ADRA1B
shinpterocarpin	ADRB2
shinpterocarpin	ADRA1D
shinpterocarpin	OPRM1
shinpterocarpin	ESR2
shinpterocarpin	MAPK14
shinpterocarpin	GSK3B
shinpterocarpin	CDK2
shinpterocarpin	RXRB
shinpterocarpin	PRSS1
shinpterocarpin	CCNA2
shinpterocarpin	NCOA1
shinpterocarpin	PCP4
(e)-3-[3,4-dihydroxy-5-(3-methylbut-2-enyl)phenyl]-1-(2,4-dihydroxyphenyl)prop-2-en-1-one	ESR1
(e)-3-[3,4-dihydroxy-5-(3-methylbut-2-enyl)phenyl]-1-(2,4-dihydroxyphenyl)prop-2-en-1-one	AR
(e)-3-[3,4-dihydroxy-5-(3-methylbut-2-enyl)phenyl]-1-(2,4-dihydroxyphenyl)prop-2-en-1-one	PPARG
(e)-3-[3,4-dihydroxy-5-(3-methylbut-2-enyl)phenyl]-1-(2,4-dihydroxyphenyl)prop-2-en-1-one	PTGS2
(e)-3-[3,4-dihydroxy-5-(3-methylbut-2-enyl)phenyl]-1-(2,4-dihydroxyphenyl)prop-2-en-1-one	MAPK14
(e)-3-[3,4-dihydroxy-5-(3-methylbut-2-enyl)phenyl]-1-(2,4-dihydroxyphenyl)prop-2-en-1-one	GSK3B
(e)-3-[3,4-dihydroxy-5-(3-methylbut-2-enyl)phenyl]-1-(2,4-dihydroxyphenyl)prop-2-en-1-one	HSP90AA1
(e)-3-[3,4-dihydroxy-5-(3-methylbut-2-enyl)phenyl]-1-(2,4-dihydroxyphenyl)prop-2-en-1-one	CDK2
(e)-3-[3,4-dihydroxy-5-(3-methylbut-2-enyl)phenyl]-1-(2,4-dihydroxyphenyl)prop-2-en-1-one	CCNA2
(e)-3-[3,4-dihydroxy-5-(3-methylbut-2-enyl)phenyl]-1-(2,4-dihydroxyphenyl)prop-2-en-1-one	NCOA2
(e)-3-[3,4-dihydroxy-5-(3-methylbut-2-enyl)phenyl]-1-(2,4-dihydroxyphenyl)prop-2-en-1-one	PCP4
glyzaglabrin	PPARG
glyzaglabrin	DPP4
glyzaglabrin	MAPK14
glyzaglabrin	HSP90AA1
glyzaglabrin	CHEK1
glabranin	NOS2
glabranin	PTGS1
glabranin	ESR1
glabranin	SCN5A
glabranin	F7
glabranin	PTGS2
glabranin	PDE3A
glabranin	HSP90AA1
glabranin	PCP4
glabrene	NOS2
glabrene	PTGS1
glabrene	ESR1
glabrene	AR
glabrene	SCN5A
glabrene	PPARG
glabrene	F7
glabrene	PTGS2
glabrene	RXRA
glabrene	ADRB2
glabrene	ESR2
glabrene	MAPK14
glabrene	GSK3B
glabrene	HSP90AA1
glabrene	CDK2
glabrene	PRSS1
glabrene	NCOA2
glabrene	PCP4
glabrone	NOS2
glabrone	PTGS1
glabrone	SERPIND1
glabrone	ESR1
glabrone	AR
glabrone	SCN5A
glabrone	PPARG
glabrone	F7
glabrone	PTGS2
glabrone	RXRA
glabrone	ACHE
glabrone	ESR2
glabrone	DPP4
glabrone	MAPK14
glabrone	GSK3B
glabrone	CDK2
glabrone	CHEK1
glabrone	PRSS1
glabrone	CCNA2
glabrone	PCP4
1,3-dihydroxy-9-methoxy-6-benzofurano[3,2-c]chromenone	ESR1
1,3-dihydroxy-9-methoxy-6-benzofurano[3,2-c]chromenone	PPARG
1,3-dihydroxy-9-methoxy-6-benzofurano[3,2-c]chromenone	ESR2
1,3-dihydroxy-9-methoxy-6-benzofurano[3,2-c]chromenone	MAPK14
1,3-dihydroxy-9-methoxy-6-benzofurano[3,2-c]chromenone	GSK3B
1,3-dihydroxy-9-methoxy-6-benzofurano[3,2-c]chromenone	HSP90AA1
1,3-dihydroxy-9-methoxy-6-benzofurano[3,2-c]chromenone	CDK2
1,3-dihydroxy-9-methoxy-6-benzofurano[3,2-c]chromenone	CHEK1
1,3-dihydroxy-9-methoxy-6-benzofurano[3,2-c]chromenone	CCNA2
1,3-dihydroxy-8,9-dimethoxy-6-benzofurano[3,2-c]chromenone	ESR1
1,3-dihydroxy-8,9-dimethoxy-6-benzofurano[3,2-c]chromenone	AR
1,3-dihydroxy-8,9-dimethoxy-6-benzofurano[3,2-c]chromenone	PPARG
1,3-dihydroxy-8,9-dimethoxy-6-benzofurano[3,2-c]chromenone	MAPK14
1,3-dihydroxy-8,9-dimethoxy-6-benzofurano[3,2-c]chromenone	GSK3B
1,3-dihydroxy-8,9-dimethoxy-6-benzofurano[3,2-c]chromenone	HSP90AA1
1,3-dihydroxy-8,9-dimethoxy-6-benzofurano[3,2-c]chromenone	CDK2
1,3-dihydroxy-8,9-dimethoxy-6-benzofurano[3,2-c]chromenone	CHEK1
eurycarpin a	NOS2
eurycarpin a	SERPIND1
eurycarpin a	ESR1
eurycarpin a	AR
eurycarpin a	SCN5A
eurycarpin a	PPARG
eurycarpin a	F7
eurycarpin a	PTGS2
eurycarpin a	ESR2
eurycarpin a	DPP4
eurycarpin a	MAPK14
eurycarpin a	GSK3B
eurycarpin a	HSP90AA1
eurycarpin a	CDK2
eurycarpin a	CHEK1
eurycarpin a	PRSS1
eurycarpin a	CCNA2
eurycarpin a	PCP4
sigmoidin-b	ESR1
sigmoidin-b	F7
sigmoidin-b	PTGS2
sigmoidin-b	KDR
sigmoidin-b	HSP90AA1
sigmoidin-b	PCP4
(2r)-7-hydroxy-2-(4-hydroxyphenyl)chroman-4-one	PTGS1
(2r)-7-hydroxy-2-(4-hydroxyphenyl)chroman-4-one	ESR1
(2r)-7-hydroxy-2-(4-hydroxyphenyl)chroman-4-one	PTGS2
(2r)-7-hydroxy-2-(4-hydroxyphenyl)chroman-4-one	RXRA
(2r)-7-hydroxy-2-(4-hydroxyphenyl)chroman-4-one	PDE3A
(2r)-7-hydroxy-2-(4-hydroxyphenyl)chroman-4-one	ADRB2
(2r)-7-hydroxy-2-(4-hydroxyphenyl)chroman-4-one	HSP90AA1
(2r)-7-hydroxy-2-(4-hydroxyphenyl)chroman-4-one	LACTBL1
(2r)-7-hydroxy-2-(4-hydroxyphenyl)chroman-4-one	MAOB
(2r)-7-hydroxy-2-(4-hydroxyphenyl)chroman-4-one	PKIA
(2r)-7-hydroxy-2-(4-hydroxyphenyl)chroman-4-one	PCP4
(2r)-7-hydroxy-2-(4-hydroxyphenyl)chroman-4-one	GABRA1
(2r)-7-hydroxy-2-(4-hydroxyphenyl)chroman-4-one	SLC6A4
(2s)-7-hydroxy-2-(4-hydroxyphenyl)-8-(3-methylbut-2-enyl)chroman-4-one	NOS2
(2s)-7-hydroxy-2-(4-hydroxyphenyl)-8-(3-methylbut-2-enyl)chroman-4-one	PTGS1
(2s)-7-hydroxy-2-(4-hydroxyphenyl)-8-(3-methylbut-2-enyl)chroman-4-one	ESR1
(2s)-7-hydroxy-2-(4-hydroxyphenyl)-8-(3-methylbut-2-enyl)chroman-4-one	SCN5A
(2s)-7-hydroxy-2-(4-hydroxyphenyl)-8-(3-methylbut-2-enyl)chroman-4-one	F7
(2s)-7-hydroxy-2-(4-hydroxyphenyl)-8-(3-methylbut-2-enyl)chroman-4-one	PTGS2
(2s)-7-hydroxy-2-(4-hydroxyphenyl)-8-(3-methylbut-2-enyl)chroman-4-one	PDE3A
(2s)-7-hydroxy-2-(4-hydroxyphenyl)-8-(3-methylbut-2-enyl)chroman-4-one	ADRA1B
(2s)-7-hydroxy-2-(4-hydroxyphenyl)-8-(3-methylbut-2-enyl)chroman-4-one	ADRB2
(2s)-7-hydroxy-2-(4-hydroxyphenyl)-8-(3-methylbut-2-enyl)chroman-4-one	ESR2
(2s)-7-hydroxy-2-(4-hydroxyphenyl)-8-(3-methylbut-2-enyl)chroman-4-one	HSP90AA1
(2s)-7-hydroxy-2-(4-hydroxyphenyl)-8-(3-methylbut-2-enyl)chroman-4-one	PCP4
isoglycyrol	DPP4
isolicoflavonol	SERPIND1
isolicoflavonol	PPARG
isolicoflavonol	F7
isolicoflavonol	HSP90AA1
isolicoflavonol	NCOA2
isolicoflavonol	PCP4
hmo	NOS2
hmo	PTGS1
hmo	CHRM1
hmo	ESR1
hmo	AR
hmo	SCN5A
hmo	PPARG
hmo	PTGS2
hmo	RXRA
hmo	PDE3A
hmo	SLC6A3
hmo	ADRB2
hmo	SLC6A4
hmo	ESR2
hmo	DPP4
hmo	MAPK14
hmo	GSK3B
hmo	CDK2
hmo	MAOB
hmo	CHEK1
hmo	PRSS1
hmo	CCNA2
hmo	PKIA
hmo	PCP4
1-methoxyphaseollidin	NOS2
1-methoxyphaseollidin	PTGS1
1-methoxyphaseollidin	SERPIND1
1-methoxyphaseollidin	KCNH2
1-methoxyphaseollidin	ESR1
1-methoxyphaseollidin	AR
1-methoxyphaseollidin	SCN5A
1-methoxyphaseollidin	PPARG
1-methoxyphaseollidin	F7
1-methoxyphaseollidin	PTGS2
1-methoxyphaseollidin	KDR
1-methoxyphaseollidin	RXRA
1-methoxyphaseollidin	ADRA1B
1-methoxyphaseollidin	ADRB2
1-methoxyphaseollidin	ADRA1D
1-methoxyphaseollidin	TOP2B
1-methoxyphaseollidin	ESR2
1-methoxyphaseollidin	MAPK14
1-methoxyphaseollidin	GSK3B
1-methoxyphaseollidin	HSP90AA1
1-methoxyphaseollidin	CDK2
1-methoxyphaseollidin	PRSS1
1-methoxyphaseollidin	CCNA2
1-methoxyphaseollidin	NCOA2
1-methoxyphaseollidin	NCOA1
1-methoxyphaseollidin	PCP4
quercetin der	NOS2
quercetin der	PTGS1
quercetin der	ESR1
quercetin der	AR
quercetin der	SCN5A
quercetin der	PPARG
quercetin der	PTGS2
quercetin der	ESR2
quercetin der	DPP4
quercetin der	MAPK14
quercetin der	GSK3B
quercetin der	HSP90AA1
quercetin der	CDK2
quercetin der	PRSS1
quercetin der	NCOA2
quercetin der	PCP4
icos-5-enoic acid	NCOA2
kanzonol f	ESR1
kanzonol f	AR
kanzonol f	F7
kanzonol f	PTGS2
kanzonol f	ESR2
kanzonol f	NCOA2
kanzonol f	PCP4
6-prenylated eriodictyol	NOS2
6-prenylated eriodictyol	ESR1
6-prenylated eriodictyol	SCN5A
6-prenylated eriodictyol	F7
6-prenylated eriodictyol	PTGS2
6-prenylated eriodictyol	HSP90AA1
6-prenylated eriodictyol	PCP4
8-prenylated eriodictyol	ESR1
8-prenylated eriodictyol	SCN5A
8-prenylated eriodictyol	F7
8-prenylated eriodictyol	PTGS2
8-prenylated eriodictyol	HSP90AA1
8-prenylated eriodictyol	NCOA1
8-prenylated eriodictyol	PCP4
gadelaidic acid	NCOA2
vestitol	NOS2
vestitol	PTGS1
vestitol	CHRM1
vestitol	ESR1
vestitol	AR
vestitol	SCN5A
vestitol	PPARG
vestitol	PTGS2
vestitol	CHRM4
vestitol	RXRA
vestitol	PDE3A
vestitol	HTR2A
vestitol	ADRA1D
vestitol	ADRA1B
vestitol	SLC6A3
vestitol	ADRB2
vestitol	SLC6A4
vestitol	ESR2
vestitol	DPP4
vestitol	MAPK14
vestitol	GSK3B
vestitol	HSP90AA1
vestitol	CDK2
vestitol	CHEK1
vestitol	PRSS1
vestitol	CCNA2
vestitol	PKIA
vestitol	PCP4
gancaonin g	NOS2
gancaonin g	SERPIND1
gancaonin g	ESR1
gancaonin g	AR
gancaonin g	PPARG
gancaonin g	F7
gancaonin g	PTGS2
gancaonin g	TOP2B
gancaonin g	ESR2
gancaonin g	DPP4
gancaonin g	MAPK14
gancaonin g	GSK3B
gancaonin g	HSP90AA1
gancaonin g	CHEK1
gancaonin g	PRSS1
gancaonin g	CCNA2
gancaonin g	NCOA2
gancaonin g	PCP4
gancaonin h	ESR1
gancaonin h	AR
gancaonin h	F7
gancaonin h	PTGS2
gancaonin h	KDR
gancaonin h	TOP2B
gancaonin h	HSP90AA1
gancaonin h	PRSS1
gancaonin h	CCNA2
gancaonin h	NCOA2
gancaonin h	PCP4
licoagrocarpin	NOS2
licoagrocarpin	PTGS1
licoagrocarpin	CHRM3
licoagrocarpin	SERPIND1
licoagrocarpin	KCNH2
licoagrocarpin	CHRM1
licoagrocarpin	ESR1
licoagrocarpin	AR
licoagrocarpin	SCN5A
licoagrocarpin	PPARG
licoagrocarpin	F7
licoagrocarpin	CHRM5
licoagrocarpin	PTGS2
licoagrocarpin	RXRA
licoagrocarpin	ACHE
licoagrocarpin	ADRA1B
licoagrocarpin	ADRB2
licoagrocarpin	ESR2
licoagrocarpin	MAPK14
licoagrocarpin	GSK3B
licoagrocarpin	HSP90AA1
licoagrocarpin	CDK2
licoagrocarpin	RXRB
licoagrocarpin	PRSS1
licoagrocarpin	CCNA2
licoagrocarpin	NCOA2
licoagrocarpin	PCP4
glyasperins m	NOS2
glyasperins m	PTGS1
glyasperins m	KCNH2
glyasperins m	ESR1
glyasperins m	AR
glyasperins m	SCN5A
glyasperins m	PPARG
glyasperins m	F7
glyasperins m	PTGS2
glyasperins m	KDR
glyasperins m	ACHE
glyasperins m	TOP2B
glyasperins m	ESR2
glyasperins m	PPARD
glyasperins m	GSK3B
glyasperins m	HSP90AA1
glyasperins m	CDK2
glyasperins m	PRSS1
glyasperins m	CCNA2
glyasperins m	NCOA2
glyasperins m	NCOA1
glyasperins m	PCP4
glycyrrhiza flavonol a	NOS2
glycyrrhiza flavonol a	ESR1
glycyrrhiza flavonol a	AR
glycyrrhiza flavonol a	F7
glycyrrhiza flavonol a	PTGS2
glycyrrhiza flavonol a	ACHE
glycyrrhiza flavonol a	TOP2B
glycyrrhiza flavonol a	ESR2
glycyrrhiza flavonol a	DPP4
glycyrrhiza flavonol a	GSK3B
glycyrrhiza flavonol a	HSP90AA1
glycyrrhiza flavonol a	CDK2
glycyrrhiza flavonol a	PRSS1
glycyrrhiza flavonol a	CCNA2
glycyrrhiza flavonol a	PCP4
licoagroisoflavone	SERPIND1
licoagroisoflavone	PPARG
licoagroisoflavone	F7
licoagroisoflavone	DPP4
licoagroisoflavone	MAPK14
licoagroisoflavone	CHEK1
licoagroisoflavone	PCP4
odoratin	NOS2
odoratin	PTGS1
odoratin	ESR1
odoratin	AR
odoratin	SCN5A
odoratin	PPARG
odoratin	PTGS2
odoratin	RXRA
odoratin	ESR2
odoratin	DPP4
odoratin	MAPK14
odoratin	GSK3B
odoratin	HSP90AA1
odoratin	CDK2
odoratin	CHEK1
odoratin	PRSS1
odoratin	CCNA2
odoratin	NCOA2
odoratin	PCP4
phaseol	SERPIND1
phaseol	ESR1
phaseol	AR
phaseol	PPARG
phaseol	PTGS2
phaseol	KDR
phaseol	MAPK14
phaseol	GSK3B
phaseol	HSP90AA1
phaseol	CDK2
phaseol	CHEK1
phaseol	CCNA2
xambioona	F7
xambioona	NCOA2
xambioona	PCP4
estrone	DRD1
estrone	CHRM3
estrone	SERPIND1
estrone	CHRM1
estrone	CHRM5
estrone	PTGS2
estrone	CA2
estrone	CHRM4
estrone	RXRA
estrone	OPRD1
estrone	ACHE
estrone	PDE3A
estrone	HTR2A
estrone	SLC6A2
estrone	ADRA1D
estrone	HTR2C
estrone	PGR
estrone	CHRM2
estrone	OPRK1
estrone	SLC6A3
estrone	ADRB2
estrone	SLC6A4
estrone	DRD2
estrone	OPRM1
11,14-eicosadienoic acid	NCOA2
gondoic acid	PTGS1
gondoic acid	NCOA2
spinasterol	PGR
spinasterol	NR3C2
spinasterol	NCOA2
machiline	PTGS1
machiline	CHRM3
machiline	CHRM1
machiline	ADRB1
machiline	SCN5A
machiline	PTGS2
machiline	ADRA2A
machiline	ADRA2C
machiline	CHRM4
machiline	RXRA
machiline	PDE3A
machiline	ADRA1D
machiline	ADRA2B
machiline	ADRA1B
machiline	SLC6A3
machiline	ADRB2
machiline	SLC6A4
machiline	HSP90AA1
machiline	NCOA2
machiline	PCP4
beta-sitosterol	PGR
beta-sitosterol	NCOA2
beta-sitosterol	PTGS1
beta-sitosterol	PTGS2
beta-sitosterol	HSP90AA1
beta-sitosterol	KCNH2
beta-sitosterol	DRD1
beta-sitosterol	CHRM3
beta-sitosterol	CHRM1
beta-sitosterol	SCN5A
beta-sitosterol	CHRM4
beta-sitosterol	PDE3A
beta-sitosterol	HTR2A
beta-sitosterol	ADRA1D
beta-sitosterol	CHRM2
beta-sitosterol	ADRA1B
beta-sitosterol	ADRB2
beta-sitosterol	CHRNA2
beta-sitosterol	SLC6A4
beta-sitosterol	OPRM1
beta-sitosterol	GABRA1
beta-sitosterol	BCL2
beta-sitosterol	BAX
beta-sitosterol	CASP9
beta-sitosterol	JUN
beta-sitosterol	CASP3
beta-sitosterol	CASP8
beta-sitosterol	PRKCA
beta-sitosterol	TGFB1
beta-sitosterol	PON1
beta-sitosterol	MAP2
16-beta-methoxyalisol b monoacetate	NR3C1
alisol b	NR3C2
1-monolinolein	PTGS1
[(1s,3r)-1-[(2r)-3,3-dimethyloxiran-2-yl]-3-[(5r,8s,9s,10s,11s,14r)-11-hydroxy-4,4,8,10,14-pentamethyl-3-oxo-1,2,5,6,7,9,11,12,15,16-decahydrocyclopenta[a]phenanthren-17-yl]butyl] acetate	NR3C1
cerevisterol	NR3C2
ergosta-7,22e-dien-3-beta-ol	PGR
(22e,24r)-ergosta-7,22-dien-3-one	PGR
ergosta-7,22-diene-3-beta-ol	PGR
ergosta-7,22-diene-3-beta-ol	NCOA2
ergosta-7,22-diene-3-beta-ol	NR3C2
ergosta-7,22-dien-3-one	PGR
ergosta-5,7,22-trien-3-ol	AR
ergosta-5,7,22-trien-3-ol	PGR
polyporusterone g	NR3C2
14-acetyl-12-senecioyl-2e,8z,10e-atractylentriol	PTGS2
(3s,8s,9s,10r,13r,14s,17r)-10,13-dimethyl-17-[(2r,5s)-5-propan-2-yloctan-2-yl]-2,3,4,7,8,9,11,12,14,15,16,17-dodecahydro-1h-cyclopenta[a]phenanthren-3-ol	PGR
8-beta-ethoxy atractylenolide iii	PTGS2
8-beta-ethoxy atractylenolide iii	GABRA1
8-beta-ethoxy atractylenolide iii	NCOA2
8-beta-ethoxy atractylenolide iii	NCOA1
trametenolic acid	NR3C2
ergosterol peroxide	PGR
hederagenin	PGR
hederagenin	NCOA2
hederagenin	CHRM3
hederagenin	CHRM1
hederagenin	CHRM2
hederagenin	ADRA1B
hederagenin	GABRA1
hederagenin	GRIA2
hederagenin	ADH1B
hederagenin	ADH1C
hederagenin	LYZ
hederagenin	PTGS1
hederagenin	SCN5A
hederagenin	PTGS2
hederagenin	RXRA
hederagenin	PDE3A
hederagenin	SLC6A2
linoleyl acetate	PTGS1
linoleyl acetate	PTGS2
linoleyl acetate	NCOA2
linoleyl acetate	RXRA
3,5,6,7-tetramethoxy-2-(3,4,5-trimethoxyphenyl)chromone	SERPIND1
3,5,6,7-tetramethoxy-2-(3,4,5-trimethoxyphenyl)chromone	ESR1
3,5,6,7-tetramethoxy-2-(3,4,5-trimethoxyphenyl)chromone	AR
3,5,6,7-tetramethoxy-2-(3,4,5-trimethoxyphenyl)chromone	F7
3,5,6,7-tetramethoxy-2-(3,4,5-trimethoxyphenyl)chromone	PTGS2
3,5,6,7-tetramethoxy-2-(3,4,5-trimethoxyphenyl)chromone	ACHE
3,5,6,7-tetramethoxy-2-(3,4,5-trimethoxyphenyl)chromone	TOP2B
3,5,6,7-tetramethoxy-2-(3,4,5-trimethoxyphenyl)chromone	ESR2
3,5,6,7-tetramethoxy-2-(3,4,5-trimethoxyphenyl)chromone	PRSS1
3,5,6,7-tetramethoxy-2-(3,4,5-trimethoxyphenyl)chromone	NCOA2
3,5,6,7-tetramethoxy-2-(3,4,5-trimethoxyphenyl)chromone	PCP4
areapillin	SERPIND1
areapillin	F7
areapillin	TOP2B
areapillin	DPP4
areapillin	HSP90AA1
areapillin	NCOA2
areapillin	PCP4
cubebin	F7
cubebin	HSP90AA1
alpha-spinasterol	PGR
alpha-spinasterol	NR3C2
alpha-spinasterol	NCOA2
acacetin	DPP4
acacetin	HSP90AA1
acacetin	NCOA2
acacetin	PCP4
acacetin	CHEK1
acacetin	PDE3A
wogonin	PPARG
wogonin	PDE3A
wogonin	DPP4
wogonin	MAPK14
wogonin	HSP90AA1
wogonin	CHEK1
wogonin	PCP4
wogonin	GABRA1
wogonin	CD40LG
(2r)-7-hydroxy-5-methoxy-2-phenylchroman-4-one	PTGS1
(2r)-7-hydroxy-5-methoxy-2-phenylchroman-4-one	DRD1
(2r)-7-hydroxy-5-methoxy-2-phenylchroman-4-one	CHRM3
(2r)-7-hydroxy-5-methoxy-2-phenylchroman-4-one	CHRM1
(2r)-7-hydroxy-5-methoxy-2-phenylchroman-4-one	ESR1
(2r)-7-hydroxy-5-methoxy-2-phenylchroman-4-one	SCN5A
(2r)-7-hydroxy-5-methoxy-2-phenylchroman-4-one	PTGS2
(2r)-7-hydroxy-5-methoxy-2-phenylchroman-4-one	RXRA
(2r)-7-hydroxy-5-methoxy-2-phenylchroman-4-one	PDE3A
(2r)-7-hydroxy-5-methoxy-2-phenylchroman-4-one	ADRA1D
(2r)-7-hydroxy-5-methoxy-2-phenylchroman-4-one	ADRA1B
(2r)-7-hydroxy-5-methoxy-2-phenylchroman-4-one	SLC6A3
(2r)-7-hydroxy-5-methoxy-2-phenylchroman-4-one	ADRB2
[truncated: 754 more rows]
