# Supplementary material
Source: publisher figshare collection journal article supplement (https://springernature.figshare.com/articles/dataset/_/12063372)
Supplement: Supplementary file 2 [file 1 › Supplementary Table 3.xlsx]

## Sheet: Ingredient_freq
Table S3. The occurrences of the chemical ingredients in LCTE and the anti-inflammatory reports for the main ingredients
Ingredients	Occureneces	PMIDs of publications about anti-inflammation
stigmasterol	8	29078089;29034917;28555089;19786147
quercetin	7	31550528;31497913;31452288;31355385;31213101
beta-sitosterol	6	30905278;29622518;24402767;20946894;17920528
kaempferol	6	31825618;31407330;31356553;30286691;29574133
luteolin	6	31956559;31673976;31321999;31302373;31091348
isorhamnetin	4	31698018;26045738;24337631;23774260
naringenin	4	31075238;30612217;30609878;30100446;29849498
5,7-dihydroxy-2-(3-hydroxy-4-methoxyphenyl)chroman-4-one	3	not report
genkwanin	3	31401534;30991087;24800851
taxifolin	3	31881484;31242797;31152760;30925321;30017742
24-ethylcholest-4-en-3-one	2	not report
5,8-dihydroxy-6,7-dimethoxyflavone	2	not report
acacetin	2	29243040;28988328;27819271;30632500;23918449
baicalein	2	31692453;31650468;31474856;31360692;31254764
betulinic acid	2	31545273;31364231;31244833;31129421;30553912
coptisine	2	28648405;27294276;27018392;26073947;24267256
diop	2	not report
ergosta-7,22e-dien-3-beta-ol	2	24551093
eriodyctiol (flavanone)	2	not report
formononetin	2	31922224;31768751;31561418;30937838;30326221
glycyrol	2	25036817;18621150
gondoic acid	2	not report
licochalcone b	2	27746874;25215172;19291859
nobiletin	2	32129440;32048561;31705353;31214026;31117553
phaseol	2	not report
poriferast-5-en-3beta-ol	2	not report
spinasterol	2	24161429
(22e,24r)-ergosta-7,22-dien-3-one	1	not search
(2r)-7-hydroxy-2-(4-hydroxyphenyl)chroman-4-one	1	not search
(2r)-7-hydroxy-5-methoxy-2-phenylchroman-4-one	1	not search
(2s)-2-[4-hydroxy-3-(3-methylbut-2-enyl)phenyl]-8,8-dimethyl-2,3-dihydropyrano[2,3-f]chromen-4-one	1	not search
(2s)-6-(2,4-dihydroxyphenyl)-2-(2-hydroxypropan-2-yl)-4-methoxy-2,3-dihydrofuro[3,2-g]chromen-7-one	1	not search
(2s)-7-hydroxy-2-(4-hydroxyphenyl)-8-(3-methylbut-2-enyl)chroman-4-one	1	not search
(3s)-7-hydroxy-3-(2,3,4-trimethoxyphenyl)chroman-4-one	1	not search
(3s,6s)-3-(benzyl)-6-(4-hydroxybenzyl)piperazine-2,5-quinone	1	not search
(3s,8s,9s,10r,13r,14s,17r)-10,13-dimethyl-17-[(2r,5s)-5-propan-2-yloctan-2-yl]-2,3,4,7,8,9,11,12,14,15,16,17-dodecahydro-1h-cyclopenta[a]phenanthren-3-ol	1	not search
(e)-1-(2,4-dihydroxyphenyl)-3-(2,2-dimethylchromen-6-yl)prop-2-en-1-one	1	not search
(e)-3-[3,4-dihydroxy-5-(3-methylbut-2-enyl)phenyl]-1-(2,4-dihydroxyphenyl)prop-2-en-1-one	1	not search
[(1s)-3-[(e)-but-2-enyl]-2-methyl-4-oxo-1-cyclopent-2-enyl] (1r,3r)-3-[(e)-3-methoxy-2-methyl-3-oxoprop-1-enyl]-2,2-dimethylcyclopropane-1-carboxylate	1	not search
[(1s,3r)-1-[(2r)-3,3-dimethyloxiran-2-yl]-3-[(5r,8s,9s,10s,11s,14r)-11-hydroxy-4,4,8,10,14-pentamethyl-3-oxo-1,2,5,6,7,9,11,12,15,16-decahydrocyclopenta[a]phenanthren-17-yl]butyl] acetate	1	not search
1-methoxyphaseollidin	1	not search
1-monolinolein	1	not search
1,3-dihydroxy-8,9-dimethoxy-6-benzofurano[3,2-c]chromenone	1	not search
1,3-dihydroxy-9-methoxy-6-benzofurano[3,2-c]chromenone	1	not search
10,13-eicosadienoic	1	not search
11,13-eicosadienoic acid, methyl ester	1	not search
11,14-eicosadienoic acid	1	not search
14-acetoxy-7-beta-angeloyloxy-notonipetranone	1	not search
14-acetoxy-7-beta-senecioyloxy-notonipetranone	1	not search
14-acetyl-12-senecioyl-2e,8z,10e-atractylentriol	1	not search
16-beta-methoxyalisol b monoacetate	1	not search
2-(3,4-dihydroxyphenyl)-5,7-dihydroxy-6-(3-methylbut-2-enyl)chromone	1	not search
2,3,4-trimethyl-5-phenyloxazolidine	1	not search
24-ethylcholest-4-en-4-one	1	not search
24-methylcholest-5-enyl-3belta-o-glucopyranoside_qt	1	not search
3-(3,4-dihydroxyphenyl)-5,7-dihydroxy-8-(3-methylbut-2-enyl)chromone	1	not search
3,5,6,7-tetramethoxy-2-(3,4,5-trimethoxyphenyl)chromone	1	not search
4-[(2s,3r)-5-[(e)-3-hydroxyprop-1-enyl]-7-methoxy-3-methylol-2,3-dihydrobenzofuran-2-yl]-2-methoxy-phenol	1	not search
4,9-dimethoxy-1-vinyl-beta-carboline	1	not search
5-hydroxy-7,4'-dimethoxyflavanon	1	not search
5,2'-dihydroxy-6,7,8-trimethoxyflavone	1	not search
5,2',6'-trihydroxy-7,8-dimethoxyflavone	1	not search
5,7-dihydroxy-3-(4-methoxyphenyl)-8-(3-methylbut-2-enyl)chromone	1	not search
5,7,2',6'-tetrahydroxyflavone	1	not search
5,7,2,5-tetrahydroxy-8,6-dimethoxyflavone	1	not search
5,7,4'-trihydroxy-6-methoxyflavanone	1	not search
5,7,4'-trihydroxy-8-methoxyflavanone	1	not search
5,7,4'-trihydroxy-8-methoxyflavone	1	not search
5,7,4'-trimethylapigenin	1	not search
6-methoxy aurapten	1	not search
6-methylgingediacetate	1	not search
6-prenylated eriodictyol	1	not search
7-beta-(3-ethyl-cis-crotonoyloxy)-14-hydroxy-notonipetranone	1	not search
7-beta-(3-ethyl-cis-crotonoyloxy)-la-(2-methyl butyryloxy)-3,14-dehydro-z-notonipetralactone	1	not search
7-beta-(4-methylsenecioyloxy)oplopa-3(14)e,8(10)-dien-2-one	1	not search
7-beta-angeloyloxyoplopa-3(14)z,8(10)-dien-2-one	1	not search
7-beta-senecioyloxyoplopa-3(14)z,8(10)-dien-2-one	1	not search
7-methoxy-2-methyl isoflavone	1	not search
8-(6-hydroxy-2-benzofuranyl)-2,2-dimethyl-5-chromenol	1	not search
8-beta-ethoxy atractylenolide iii	1	not search
8-prenylated eriodictyol	1	not search
aids180907	1	not search
alisol b	1	not search
alisol c monoacetate	1	not search
alpha-spinasterol	1	not search
areapillin	1	not search
berberine	1	not search
bis[(2s)-2-ethylhexyl] benzene-1,2-dicarboxylate	1	not search
calycosin	1	not search
campest-5-en-3-beta-ol	1	not search
campesterol	1	not search
caribine	1	not search
carthamidin	1	not search
cavidine	1	not search
cerevisterol	1	not search
cheilanthifoline	1	not search
citromitin	1	not search
coniferin	1	not search
cryptopin	1	not search
cubebin	1	not search
cycloartenol	1	not search
dfv	1	not search
didehydrotuberostemonine	1	not search
didymin	1	not search
dihydrobaicalin_qt	1	not search
dihydrokaempferide	1	not search
dihydrooroxylin	1	not search
dinatin	1	not search
dioscoreside c_qt	1	not search
diosgenin	1	not search
diosmetin	1	not search
epiberberine	1	not search
ergosta-5,7,22-trien-3-ol	1	not search
ergosta-7,22-dien-3-one	1	not search
ergosta-7,22-diene-3-beta-ol	1	not search
ergosterol peroxide	1	not search
eriodictyol	1	not search
estrone	1	not search
euchrenone	1	not search
eurycarpin a	1	not search
femara	1	not search
gadelaidic acid	1	not search
galangin	1	not search
gancaonin a	1	not search
gancaonin b	1	not search
gancaonin g	1	not search
gancaonin h	1	not search
glabranin	1	not search
glabrene	1	not search
glabrone	1	not search
glepidotin a	1	not search
glepidotin b	1	not search
glyasperin b	1	not search
glyasperin c	1	not search
glyasperin f	1	not search
glyasperins m	1	not search
glycyrrhiza flavonol a	1	not search
glypallichalcone	1	not search
glyzaglabrin	1	not search
hancinone c	1	not search
hederagenin	1	not search
hmo	1	not search
icos-5-enoic acid	1	not search
inermine	1	not search
irisolidone	1	not search
iristectorigenin (9ci)	1	not search
iristectorigenin a	1	not search
irolone	1	not search
isodalbergin	1	not search
isofucosterol	1	not search
isoglycyrol	1	not search
isolicoflavonol	1	not search
isosinensetin	1	not search
isotrifoliol	1	not search
jaranol	1	not search
kadsurenone	1	not search
kanzonol f	1	not search
la-7-beta-di(4-methulsenecioyloxy) oplopa-3(14)z,8(10)-dien-2-one	1	not search
licoagrocarpin	1	not search
licoagroisoflavone	1	not search
licochalcone g	1	not search
licocoumarone	1	not search
licoisoflavanone	1	not search
licoisoflavone	1	not search
licoisoflavone b	1	not search
licoricone	1	not search
linoleyl acetate	1	not search
lupiwighteone	1	not search
machiline	1	not search
magnograndiolide	1	not search
mandenol	1	not search
medicarpin	1	not search
methyl butyric acid tussilagin ester	1	not search
moslosooflavone	1	not search
neobaicalein	1	not search
neohesperidin_qt	1	not search
norwogonin	1	not search
odoratin	1	not search
oroxylin a	1	not search
panicolin	1	not search
pectolinarigenin	1	not search
phenanthrone	1	not search
piperlonguminine	1	not search
polyporusterone g	1	not search
quercetin 7-o-beta-d-glucoside	1	not search
quercetin der	1	not search
rhamnazin	1	not search
rivularin	1	not search
salvigenin	1	not search
semilicoisoflavone b	1	not search
senkirkine	1	not search
sesamin	1	not search
shinpterocarpin	1	not search
sigmoidin-b	1	not search
sinensetin	1	not search
skullcapflavone ii	1	not search
stemonine	1	not search
tetramethoxyluteolin	1	not search
trametenolic acid	1	not search
truflex obp	1	not search
tussilagin	1	not search
vestitol	1	not search
wogonin	1	not search
worenine	1	not search
xambioona	1	not search
zinc03978781	1	not search
zinc05223929	1	not search
