# Supplementary material
Source: publisher figshare collection journal article supplement (https://springernature.figshare.com/articles/dataset/_/12063372)
Supplement: Supplementary file 2 [file 1 › Supplementary Table 4.xlsx]

## Sheet: main.sym.gene
Table S4. The proteins related to main symptoms of COVID-19 and the disease of viral respiratory infection
Symptom	Protein
Fever	HTR1A
Fever	IL6
Fever	MVK
Fever	TNFRSF1A
Fever	ASPG
Fever	IL2
Fever	IL1RN
Fever	IL1B
Fever	IL1A
Fever	HMGB1
Fever	PTGS2
Fever	IFNG
Fever	IFNA2
Fever	SOD2
Fever	CSF3
Fever	PTGES
Fever	HTR2A
Fever	CRH
Fever	CCK
Fever	FSHB
Fever	STAT3
Fever	TPH2
Fever	TNF
Fever	NOS1
Fever	CXCL8
Fever	POMC
Fever	PRL
Fever	IL6R
Fever	MEFV
Fever	EDA
Fever	TCF4
Fever	STAT4
Fever	SLC12A1
Fever	RYR1
Fever	RMRP
Fever	SLC11A1
Fever	SPINK1
Fever	PRNP
Fever	MYH3
Fever	NCF2
Fever	NCF4
Fever	NME1
Fever	NOTCH3
Fever	PIK3R1
Fever	DCLRE1C
Fever	PRSS1
Fever	PRTN3
Fever	RAG1
Fever	RAG2
Fever	MST1
Fever	TCF3
Fever	BLNK
Fever	ERAP1
Fever	ADA2
Fever	SLC29A3
Fever	CHD7
Fever	NGLY1
Fever	BTNL2
Fever	LRRC8A
Fever	NLRC4
Fever	NOD2
Fever	SLC19A3
Fever	NLRP3
Fever	LACC1
Fever	IL23R
Fever	UNC13D
Fever	UBAC2
Fever	TMEM173
Fever	IL12A-AS1
Fever	FOXP1
Fever	IL36RN
Fever	MLX
Fever	TLR4
Fever	LPIN2
Fever	WAS
Fever	WIPF1
Fever	XPA
Fever	XPC
Fever	KLRC4
Fever	STX11
Fever	BCL10
Fever	PSTPIP1
Fever	IKZF1
Fever	MALT1
Fever	ADAMTS13
Fever	TREX1
Fever	LPIN1
Fever	PTPN22
Fever	NCF1
Fever	MIF
Fever	ABL1
Fever	RUNX1
Fever	CD27
Fever	CD79B
Fever	LYST
Fever	CCR1
Fever	COL1A1
Fever	CTLA4
Fever	CYBA
Fever	CYBB
Fever	CYP21A2
Fever	DDB2
Fever	ELANE
Fever	ERCC2
Fever	ERCC3
Fever	ERCC4
Fever	CACNA1A
Fever	C4A
Fever	BTK
Fever	ADA
Fever	AK2
Fever	ALPL
Fever	BIRC3
Fever	FAS
Fever	AQP2
Fever	ATM
Fever	ATP1A2
Fever	AVP
Fever	AVPR2
Fever	CCND1
Fever	BCL2
Fever	BCL6
Fever	BCR
Fever	DST
Fever	ERCC5
Fever	LBR
Fever	HMGCL
Fever	IGLL1
Fever	IRF8
Fever	IGH
Fever	IGHM
Fever	IL2RG
Fever	IL7R
Fever	IL10
Fever	IL12A
Fever	IL12B
Fever	JAK2
Fever	KCNJ1
Fever	HMBS
Fever	HLA-DRB1
Fever	LIG4
Fever	GAA
Fever	GATA2
Fever	FBP1
Fever	GPR35
Fever	HBB
Fever	CD79A
Fever	HLA-DPB1
Fever	HLA-B
Fever	F5
Fever	HSF1
Fever	PARP1
Fever	NLRP12
Fever	KCNQ2
Fever	APOBEC3A
Fever	ITGB3
Fever	FGFR1
Fever	NFE2L2
Fever	FBN2
Fever	HDGFL2
Fever	APOBEC3G
Fever	CCL2
Fever	THBS1
Fever	CD40LG
Fever	HTRA2
Fever	NBAS
Fever	CASQ1
Fever	COL11A2
Fever	TRPV1
Fever	HTRA1
Fever	ICAM2
Fever	KCNA3
Coughing	ACE
Coughing	KNG1
Coughing	TRPV1
Coughing	TRPA1
Coughing	HLA-DPB1
Coughing	HLA-DRB1
Coughing	TSC2
Coughing	TSC1
Coughing	TGFBR2
Coughing	TERT
Coughing	TERC
Coughing	TCF3
Coughing	STAT3
Coughing	SLC11A1
Coughing	SFTPC
Coughing	RNF6
Coughing	SFTPA2
Coughing	DLEC1
Coughing	FAM13A
Coughing	MUC5B
Coughing	SFTPA1
Coughing	EIF2AK4
Coughing	CCDC151
Coughing	CCDC114
Coughing	DPP9
Coughing	LRRC8A
Coughing	BTNL2
Coughing	RTEL1
Coughing	WWOX
Coughing	BLNK
Coughing	PTPN22
Coughing	ATP11A
Coughing	STN1
Coughing	PRTN3
Coughing	GBA
Coughing	GAS8
Coughing	DNASE1L3
Coughing	IGLL1
Coughing	CTLA4
Coughing	DSP
Coughing	CD79B
Coughing	MARS
Coughing	CD79A
Coughing	ABCA3
Coughing	PIK3R1
Coughing	PARN
Coughing	IGHM
Coughing	BDKRB2
Coughing	ABO
Coughing	COPD
Coughing	EGFR
Coughing	IL1RN
Coughing	SLCO1B1
Coughing	ADRB2
Coughing	ZMYND10
Coughing	PLF
Coughing	CSF2
Coughing	ATP4A
Coughing	ATP12A
Coughing	PARP9
Coughing	SLC27A5
Coughing	TRPM8
Coughing	ACE2
Coughing	CEL
Coughing	CPN1
Coughing	AD14
Coughing	TBPL1
Coughing	TACR2
Coughing	TAC1
Coughing	MME
Coughing	SNRPN
Coughing	SMN2
Coughing	SMN1
Coughing	MMP9
Coughing	REN
Coughing	PTGIS
Coughing	PTGIR
Coughing	PTGER3
Coughing	TACR1
Coughing	STMN1
Coughing	SLC4A7
Coughing	MPZ
Coughing	SNURF
Coughing	PER2
Coughing	XPNPEP1
Coughing	TYRP1
Coughing	IL1B
Coughing	TOP2B
Coughing	IL4R
Coughing	TGFB1
Coughing	CXCL8
Coughing	PLP2
Myalgia	CPT2
Myalgia	ANO5
Myalgia	DMD
Myalgia	TRNK
Myalgia	COMT
Myalgia	TRNL1
Myalgia	ENO3
Myalgia	MEFV
Myalgia	SCN4A
Myalgia	HADHB
Myalgia	CAV3
Myalgia	NLRP3
Myalgia	STIM1
Myalgia	RBCK1
Myalgia	LPIN2
Myalgia	SEC24C
Myalgia	UFD1
Myalgia	MYOT
Myalgia	KLRC4
Myalgia	CNBP
Myalgia	HIRA
Myalgia	SCN9A
Myalgia	TNXB
Myalgia	TNFRSF1A
Myalgia	TLR4
Myalgia	MLX
Myalgia	TBX1
Myalgia	STAT4
Myalgia	PRDM5
Myalgia	POLG2
Myalgia	ORAI1
Myalgia	OTULIN
Myalgia	NLRP12
Myalgia	CCDC78
Myalgia	IL23R
Myalgia	JMJD1C
Myalgia	CAVIN1
Myalgia	UBAC2
Myalgia	ZNF469
Myalgia	FKRP
Myalgia	TRAPPC11
Myalgia	DOLK
Myalgia	LPIN1
Myalgia	PNPLA2
Myalgia	ACAD9
Myalgia	ERAP1
Myalgia	ADA2
Myalgia	TWNK
Myalgia	NLRC4
Myalgia	IL12A-AS1
Myalgia	ACADL
Myalgia	IL10
Myalgia	HMBS
Myalgia	HLA-B
Myalgia	HADHA
Myalgia	GP1BB
Myalgia	GLA
Myalgia	FMR1
Myalgia	DNA2
Myalgia	CTNNB1
Myalgia	CPOX
Myalgia	CCR1
Myalgia	CASQ1
Myalgia	C4A
Myalgia	FAS
Myalgia	APC
Myalgia	SLC25A4
Myalgia	IL12A
Myalgia	IL12B
Myalgia	LDHA
Myalgia	LMNA
Myalgia	TRNE
Myalgia	MVK
Myalgia	MYH7
Myalgia	ARVCF
Myalgia	PDGFRA
Myalgia	RREB1
Myalgia	LBR
Myalgia	LAMA2
Myalgia	EEF1A2
Myalgia	SLCO1B1
Myalgia	TNF
Myalgia	RYR1
Myalgia	ASIC3
Myalgia	APRT
Myalgia	AMPD1
Myalgia	P2RX5
Myalgia	P2RX4
Myalgia	IGF2
Myalgia	HTR7
Myalgia	IGF2-AS
Myalgia	TRPV1
Myalgia	SLC17A5
Myalgia	UCN
Myalgia	HTR3B
Myalgia	DMPK
Myalgia	HMGCR
Myalgia	CSF2
Myalgia	EIF3K
Fatigue	TGFBR2
Fatigue	EPO
Fatigue	IFNA2
Fatigue	TNFRSF10A
Fatigue	NR3C1
Fatigue	ALB
Fatigue	TLR4
Fatigue	IL10
Fatigue	BCL2
Fatigue	SOD1
Fatigue	KIT
Fatigue	KRAS
Fatigue	TSHR
Fatigue	CCND1
Fatigue	SLC11A1
Fatigue	SLC18A3
Fatigue	SLC18A2
Fatigue	SLC5A5
Fatigue	XPA
Fatigue	SLC3A1
Fatigue	SDHD
Fatigue	SDHC
Fatigue	SDHB
Fatigue	SOX3
Fatigue	STAT4
Fatigue	TAZ
Fatigue	WIPF1
Fatigue	WAS
Fatigue	VHL
Fatigue	VCP
Fatigue	TSHB
Fatigue	TPO
Fatigue	TNXB
Fatigue	NKX2-1
Fatigue	TG
Fatigue	TFR2
Fatigue	MLX
Fatigue	TCF3
Fatigue	HNF1A
Fatigue	SDHA
Fatigue	SCNN1G
Fatigue	PTPN3
Fatigue	PRTN3
Fatigue	PRPH
Fatigue	PROP1
Fatigue	PRKAR1A
Fatigue	PRKACA
Fatigue	POU1F1
Fatigue	PON3
Fatigue	PON2
Fatigue	PON1
Fatigue	PMS2
Fatigue	PMS1
Fatigue	PIK3R1
Fatigue	PIK3CA
Fatigue	PIGA
Fatigue	PFN1
Fatigue	RET
Fatigue	RPL5
Fatigue	RPL11
Fatigue	SCNN1B
Fatigue	ATXN2
Fatigue	RPS29
Fatigue	RPS28
Fatigue	RPS27
Fatigue	RPS26
Fatigue	RPS24
Fatigue	RPS19
Fatigue	RPS17
Fatigue	RPS10
Fatigue	RPS7
Fatigue	RPL35A
Fatigue	RPL27
Fatigue	RPL26
Fatigue	RPL18
Fatigue	RPL15
Fatigue	SLC26A4
Fatigue	XPC
Fatigue	IL12A-AS1
Fatigue	BTNL2
Fatigue	AGK
Fatigue	TMEM127
Fatigue	POMGNT1
Fatigue	STEAP3
Fatigue	SDHAF2
Fatigue	TET2
Fatigue	TREM2
Fatigue	ERAP1
Fatigue	PIGT
Fatigue	DUOX2
Fatigue	SLC40A1
Fatigue	UBQLN2
Fatigue	BLNK
Fatigue	TBK1
Fatigue	LRRC8A
Fatigue	TWNK
Fatigue	NLRC4
Fatigue	DUOXA2
Fatigue	CHCHD10
Fatigue	IYD
Fatigue	UBAC2
Fatigue	C9orf72
Fatigue	IL23R
Fatigue	SLC25A26
Fatigue	NLRP3
Fatigue	TSR2
Fatigue	LHX4
Fatigue	GPR101
Fatigue	SLC2A10
Fatigue	ARMC5
Fatigue	CDC73
Fatigue	CDH23
Fatigue	MMADHC
Fatigue	FOXP1
Fatigue	MLH3
Fatigue	KIF23
Fatigue	VAPB
Fatigue	USP8
Fatigue	TBX19
Fatigue	PSTPIP1
Fatigue	AIP
Fatigue	BCL10
Fatigue	SQSTM1
Fatigue	SYNJ1
Fatigue	HESX1
Fatigue	PDE8B
Fatigue	KLRC4
Fatigue	TAF15
Fatigue	FGF23
Fatigue	LHX3
Fatigue	PREPL
Fatigue	MATR3
Fatigue	DNAJC6
Fatigue	PTPN22
Fatigue	CHMP2B
Fatigue	MMACHC
Fatigue	TARDBP
Fatigue	VPS13A
Fatigue	KIF1B
Fatigue	UNC13A
Fatigue	FAN1
Fatigue	RPL35
Fatigue	MALT1
Fatigue	PPARGC1A
Fatigue	IKZF1
Fatigue	OPTN
Fatigue	SH2B3
Fatigue	FIG4
Fatigue	PAX8
Fatigue	PDGFRA
Fatigue	IGLL1
Fatigue	GLA
Fatigue	GCK
Fatigue	GCH1
Fatigue	GBA
Fatigue	GATA2
Fatigue	GATA1
Fatigue	FUS
Fatigue	FOXE1
Fatigue	FH
Fatigue	ERCC5
Fatigue	ERCC4
Fatigue	ERCC3
Fatigue	ERCC2
Fatigue	GLE1
Fatigue	GLI2
Fatigue	IGHM
Fatigue	IGH
Fatigue	HNRNPA1
Fatigue	HNF4A
Fatigue	HLA-DRB1
Fatigue	HLA-DPB1
Fatigue	HLA-B
Fatigue	HFE
Fatigue	HBA2
Fatigue	HBA1
Fatigue	MSH6
Fatigue	C4A
Fatigue	GNAS
Fatigue	ERBB4
Fatigue	EPOR
Fatigue	EPHA4
Fatigue	CD79A
Fatigue	CCNF
Fatigue	RUNX1
Fatigue	C21orf2
Fatigue	BTK
Fatigue	BCR
Fatigue	BCL6
Fatigue	ATRX
Fatigue	ATP7A
Fatigue	ATM
Fatigue	FAS
Fatigue	BIRC3
Fatigue	ANG
Fatigue	CD79B
Fatigue	CCR1
Fatigue	ELANE
Fatigue	DMD
Fatigue	DDB2
Fatigue	DCTN1
Fatigue	PDE11A
Fatigue	DAO
Fatigue	CTNNB1
Fatigue	CTLA4
Fatigue	NKX2-5
Fatigue	ABL1
Fatigue	CPT2
Fatigue	CPT1A
Fatigue	COL6A2
Fatigue	ALAS2
Fatigue	JAK2
Fatigue	ND4
Fatigue	ND1
Fatigue	IL12A
Fatigue	COX3
Fatigue	IL12B
Fatigue	COX2
Fatigue	INSR
Fatigue	COX1
Fatigue	MSH2
Fatigue	MPL
Fatigue	MLH1
Fatigue	MET
Fatigue	LBR
Fatigue	MEN1
Fatigue	MEFV
Fatigue	MDH2
Fatigue	ND5
Fatigue	MAX
Fatigue	EPCAM
Fatigue	OTX2
Fatigue	IL6
Fatigue	NFKB2
Fatigue	NEK1
Fatigue	NEFH
Fatigue	MYH7
Fatigue	TRNW
Fatigue	TRNS2
Fatigue	TRNS1
Fatigue	TRNQ
Fatigue	TRNL1
Fatigue	ND6
Fatigue	TRNH
Fatigue	TRNF
Fatigue	SERPINA6
Fatigue	IL1B
Fatigue	TNF
Fatigue	GPT
Fatigue	SLC6A4
Fatigue	RNASEL
Fatigue	IFNA1
Fatigue	NOS2
Fatigue	CXCL8
Fatigue	CDAN1
Fatigue	SLC17A5
Fatigue	ABCB1
Fatigue	IFNG
Fatigue	IL2
Fatigue	IFNA13
Fatigue	COMT
Fatigue	CRP
Fatigue	CHPT1
Fatigue	POU5F1
Fatigue	VAC14
Fatigue	TNNT1
Fatigue	ENTPD1
Fatigue	CD69
Fatigue	TNFRSF1B
Fatigue	NDUFS4
Fatigue	TNNI3
Fatigue	UGT1A1
Fatigue	NFKB1
Fatigue	GSTZ1
Fatigue	MIR145
Fatigue	ACHE
Fatigue	ACTN3
Fatigue	P2RY1
Fatigue	APRT
Fatigue	TPH2
Fatigue	P2RX5
Fatigue	P2RX4
Fatigue	IL17F
Fatigue	IL4
Fatigue	NT5E
Fatigue	POLDIP3
Fatigue	NOS1
Fatigue	DHDDS
Fatigue	BID
Fatigue	IGFBP3
Fatigue	MTMR14
Fatigue	CD14
Fatigue	SLCO1C1
Fatigue	SLC22A3
Fatigue	IDO1
Fatigue	TNFSF13B
Fatigue	TCL1A
Fatigue	ABCC4
Fatigue	HTR2A
Fatigue	F8
Fatigue	FAAH
Fatigue	KLK4
Fatigue	MIP
Fatigue	LAMA2
Fatigue	ASIC3
Fatigue	LRPAP1
Fatigue	PDC
Fatigue	MEF2C
Fatigue	TIMELESS
Fatigue	IL6R
Fatigue	TRPV1
Fatigue	E2F1
Fatigue	JPT1
Fatigue	ACE
Fatigue	PTH
Fatigue	CREB1
Fatigue	PTGS2
Fatigue	MAPK14
Fatigue	REM1
Fatigue	EIF3K
Fatigue	PYGM
Fatigue	HSP90B2P
Fatigue	DBI
Fatigue	IFI27
Fatigue	TYMS
Fatigue	PNKD
Fatigue	HSD11B2
Fatigue	TAT
Fatigue	GFPT1
Dyspnea	NPPB
Dyspnea	SERPINA1
Dyspnea	HLA-DRB1
Dyspnea	SCO2
Dyspnea	MATR3
Dyspnea	EFTUD2
Dyspnea	CRLF1
Dyspnea	VAPB
Dyspnea	AIFM1
Dyspnea	SQSTM1
Dyspnea	DPM1
Dyspnea	CNTNAP1
Dyspnea	CDC45
Dyspnea	UNC13A
Dyspnea	TREM2
Dyspnea	FASTKD2
Dyspnea	MRPL3
Dyspnea	PPARGC1A
Dyspnea	SDCCAG8
Dyspnea	SLC35A1
Dyspnea	COQ7
Dyspnea	OPTN
Dyspnea	FIG4
Dyspnea	USP9X
Dyspnea	TAF15
Dyspnea	SMPD1
Dyspnea	SLC25A1
Dyspnea	SFTPC
Dyspnea	SFTPB
Dyspnea	SCO1
Dyspnea	SCN5A
Dyspnea	ATXN2
Dyspnea	RPS28
Dyspnea	PRPH
Dyspnea	SOD1
Dyspnea	SOX9
Dyspnea	KAT6A
Dyspnea	WIPF1
Dyspnea	WAS
Dyspnea	VCP
Dyspnea	VCL
Dyspnea	TSC2
Dyspnea	TSC1
Dyspnea	NKX2-1
Dyspnea	STAT5B
Dyspnea	PON3
Dyspnea	RNU4ATAC
Dyspnea	MMAA
Dyspnea	LGI4
Dyspnea	NAGS
Dyspnea	SIK1
Dyspnea	COX20
Dyspnea	SLC52A3
Dyspnea	MGME1
Dyspnea	UBE3B
Dyspnea	COX14
Dyspnea	BMPER
Dyspnea	ARX
Dyspnea	PET100
Dyspnea	COA5
Dyspnea	EIF2AK4
Dyspnea	CHCHD10
Dyspnea	DNAAF3
Dyspnea	MMAB
Dyspnea	PCSK9
Dyspnea	C9orf72
Dyspnea	STT3B
Dyspnea	MEGF10
Dyspnea	APOPT1
Dyspnea	CDT1
Dyspnea	TACO1
Dyspnea	IFT52
Dyspnea	GMNN
Dyspnea	UBQLN2
Dyspnea	TBK1
Dyspnea	LDLRAP1
Dyspnea	CHMP2B
Dyspnea	ORC6
Dyspnea	ISCU
Dyspnea	PIGT
Dyspnea	DNAH7
Dyspnea	CSPP1
Dyspnea	COA7
Dyspnea	VPS33A
Dyspnea	ABCG8
Dyspnea	ABCG5
Dyspnea	JPH2
Dyspnea	LYRM4
Dyspnea	FAM20C
Dyspnea	BTNL2
Dyspnea	TARDBP
Dyspnea	PON2
Dyspnea	FUS
Dyspnea	ENG
Dyspnea	EDA
Dyspnea	DSC2
Dyspnea	DNASE1L3
Dyspnea	DMPK
Dyspnea	DCTN1
Dyspnea	DAO
Dyspnea	CTGF
Dyspnea	EP300
Dyspnea	EPHA4
Dyspnea	ERBB4
Dyspnea	FLNC
Dyspnea	FOXF1
Dyspnea	FGFR2
Dyspnea	FGFR1
Dyspnea	FBP1
Dyspnea	ETFDH
Dyspnea	ETFB
Dyspnea	ETFA
Dyspnea	CSF2RB
Dyspnea	CREBBP
Dyspnea	CPT2
Dyspnea	C21orf2
Dyspnea	BMPR2
Dyspnea	ATRX
Dyspnea	ALDH7A1
Dyspnea	APOB
Dyspnea	ANG
Dyspnea	ADCY6
Dyspnea	ACVRL1
Dyspnea	CASR
Dyspnea	CAV1
Dyspnea	CCNF
Dyspnea	COX10
Dyspnea	COX6B1
Dyspnea	COL2A1
Dyspnea	CCR6
Dyspnea	CHRNE
Dyspnea	CHRND
Dyspnea	CHAT
Dyspnea	CDC6
Dyspnea	ABCA3
Dyspnea	GAA
Dyspnea	PRRX1
Dyspnea	LAMB3
Dyspnea	LAMC2
Dyspnea	LDLR
Dyspnea	LIFR
Dyspnea	TRNN
Dyspnea	MARS
Dyspnea	TRNK
Dyspnea	TRNS1
Dyspnea	MUT
Dyspnea	MYBPC3
Dyspnea	MYL2
Dyspnea	NEFH
Dyspnea	NEK1
Dyspnea	ORC1
Dyspnea	ORC4
Dyspnea	OTX2
Dyspnea	PFN1
Dyspnea	LAMA3
Dyspnea	KCNJ6
Dyspnea	GBA
Dyspnea	GLE1
Dyspnea	PON1
Dyspnea	HBB
Dyspnea	HLCS
Dyspnea	HNRNPA1
Dyspnea	IRF5
Dyspnea	EGFR
Dyspnea	GSTM1
Dyspnea	CSF2RA
Dyspnea	GPT
Dyspnea	GPHN
Dyspnea	WFDC1
Dyspnea	F5
Dyspnea	PMP22
Dyspnea	SAG
Dyspnea	ADRB2
Dyspnea	POMC
Dyspnea	SLC6A4
Dyspnea	GSTP1
Dyspnea	HTR3B
Dyspnea	MPZ
Dyspnea	MTHFR
Dyspnea	CXCL8
Dyspnea	LRPAP1
Dyspnea	IL4R
Dyspnea	TGFB1
Dyspnea	INSRR
Dyspnea	EGR2
Dyspnea	FEV
Dyspnea	ARRB2
Dry_cough	ACE
Dry_cough	CD14
Dry_cough	TNF
Anorexia	TNF
Anorexia	NPY
Anorexia	CRH
Anorexia	CRHR2
Anorexia	PYY
Anorexia	CCK
Anorexia	CRHR1
Anorexia	IFNA2
Anorexia	GCG
Anorexia	GIP
Anorexia	TNFRSF10A
Anorexia	IL2
Anorexia	IL1RN
Anorexia	IL1B
Anorexia	HTR4
Anorexia	UCN2
Anorexia	TNFRSF1A
Anorexia	ARG1
Anorexia	ND6
Anorexia	LEP
Anorexia	KRAS
Anorexia	IL12B
Anorexia	TRNW
Anorexia	MUT
Anorexia	MLX
Anorexia	SLC4A1
Anorexia	IGH
Anorexia	TRNS2
Anorexia	SMAD4
Anorexia	TP53
Anorexia	ND5
Anorexia	TRNH
Anorexia	TRNL1
Anorexia	ND1
Anorexia	COX3
Anorexia	COX2
Anorexia	TRNQ
Anorexia	COX1
Anorexia	TRNS1
Anorexia	ND4
Anorexia	SCARB2
Anorexia	SLC46A1
Anorexia	PALB2
Anorexia	DAXX
Anorexia	ATM
Anorexia	CDKN2A
Anorexia	TRNF
Anorexia	BRCA2
Anorexia	BRCA1
Anorexia	ATRX
Anorexia	CCND1
Anorexia	GBA
Anorexia	AQP2
Anorexia	SLC19A2
Anorexia	PALLD
Anorexia	MMACHC
Anorexia	PTPN22
Anorexia	HMBS
Anorexia	HLCS
Anorexia	HLA-B
Anorexia	MMADHC
Anorexia	ALPL
Anorexia	GLA
Anorexia	AVPR2
Anorexia	POMC
Anorexia	BDNF
Anorexia	GHRL
Anorexia	RMC1
Anorexia	GDF15
Anorexia	MAGEL2
Anorexia	SLC6A4
Anorexia	UCN3
Anorexia	NPY2R
Anorexia	OXT
Anorexia	GHSR
Anorexia	HTR2C
Anorexia	MC4R
Anorexia	AGRP
Anorexia	TINAGL1
Anorexia	TRPC7
Anorexia	CHPT1
Anorexia	ECT
Anorexia	FASN
Anorexia	ADIPOR1
Anorexia	GLP1R
Anorexia	ADIPOR2
Anorexia	FAAH
Anorexia	DHDDS
Anorexia	SFTPA1
Anorexia	PYY3
Anorexia	BW16
Anorexia	C1QL3
Anorexia	OR2AG1
Anorexia	ALB
Anorexia	ARVCF
Anorexia	COMT
Anorexia	H2AFX
Anorexia	HMGB1
Anorexia	GHS
Anorexia	UCP3
Anorexia	UCP2
Anorexia	NTRK3
Anorexia	TAC1
Anorexia	STAT3
Anorexia	SST
Anorexia	PAX5
Anorexia	LEPR
Anorexia	HTR3B
Anorexia	HTR2A
Anorexia	SIRT1
Anorexia	HTR2B
Anorexia	NMU
Anorexia	CARTPT
Anorexia	PTGES
Anorexia	IAPP
Anorexia	ADIPOQ
Anorexia	IL6
Pharyngalgia	CYP2C19
Pharyngalgia	HLA-C
Pharyngalgia	SMN2
Pharyngalgia	TNF
Pharyngalgia	SFI1
Pharyngalgia	CNOT1
Diarrhea	GUCY2C
Diarrhea	DGAT1
Diarrhea	MYO5B
Diarrhea	SLC9A3
Diarrhea	CD14
Diarrhea	LTF
Diarrhea	PYY
Diarrhea	IL1RN
Diarrhea	CSF3
Diarrhea	IL1A
Diarrhea	IFNA2
Diarrhea	SLC26A3
Diarrhea	NEUROG3
Diarrhea	ATP8B1
Diarrhea	PCSK1
Diarrhea	ANTXR2
Diarrhea	CYP27A1
Diarrhea	SCNN1A
Diarrhea	RFX6
Diarrhea	KCNJ11
Diarrhea	SI
Diarrhea	NR3C2
Diarrhea	RECQL4
Diarrhea	MVK
Diarrhea	NAGLU
Diarrhea	NBN
Diarrhea	NME1
Diarrhea	PIGT
Diarrhea	SAR1B
Diarrhea	NCF4
Diarrhea	ABCB4
Diarrhea	MPV17
Diarrhea	LIPA
Diarrhea	IGLL1
Diarrhea	IDS
Diarrhea	IL7R
Diarrhea	CXCL8
Diarrhea	JAK3
Diarrhea	KCNJ1
Diarrhea	TNFRSF1A
Diarrhea	LRRC8A
Diarrhea	LCK
Diarrhea	LCT
Diarrhea	SLC39A4
Diarrhea	FOXP3
Diarrhea	MCM6
Diarrhea	MEFV
Diarrhea	MEN1
Diarrhea	UGT1A1
Diarrhea	MPI
Diarrhea	IGHM
Diarrhea	SLC7A7
Diarrhea	TCF3
Diarrhea	HNF1A
Diarrhea	ABCC8
Diarrhea	SLC19A2
Diarrhea	STX3
Diarrhea	STAT1
Diarrhea	AKR1D1
Diarrhea	TREH
Diarrhea	TCN2
Diarrhea	IKZF1
Diarrhea	ABCB11
Diarrhea	ELP1
Diarrhea	ZAP70
Diarrhea	CYP7B1
Diarrhea	UCP2
Diarrhea	TTC37
Diarrhea	TTR
Diarrhea	TSHR
Diarrhea	SLC12A1
Diarrhea	SCN11A
Diarrhea	SKIV2L
Diarrhea	PTPRC
Diarrhea	ICOS
Diarrhea	TMPRSS15
Diarrhea	POLG
Diarrhea	POLA1
Diarrhea	PMM2
Diarrhea	PIK3R1
Diarrhea	RRM2B
Diarrhea	BLNK
Diarrhea	RAG2
Diarrhea	SGSH
Diarrhea	SCNN1G
Diarrhea	SCNN1B
Diarrhea	SCN9A
Diarrhea	MLYCD
Diarrhea	TNFRSF13B
Diarrhea	OPLAH
Diarrhea	RET
Diarrhea	PHKB
Diarrhea	TNFRSF13C
Diarrhea	CTLA4
Diarrhea	DNMT3B
Diarrhea	CR2
Diarrhea	BLM
Diarrhea	CD40LG
Diarrhea	TYMP
Diarrhea	CPT1A
Diarrhea	CPOX
Diarrhea	AVP
Diarrhea	HSD3B7
Diarrhea	RAG1
Diarrhea	ARX
Diarrhea	DES
Diarrhea	SLC46A1
Diarrhea	ACSF3
Diarrhea	CD55
Diarrhea	HGSNAT
Diarrhea	CD3D
Diarrhea	CDKN1B
Diarrhea	SERPING1
Diarrhea	BTK
Diarrhea	BTD
Diarrhea	DDC
Diarrhea	CD19
Diarrhea	CD79A
Diarrhea	CD79B
Diarrhea	AK2
Diarrhea	ALG3
Diarrhea	AP1S1
Diarrhea	HADH
Diarrhea	AGA
Diarrhea	CDKN2C
Diarrhea	CDKN2B
Diarrhea	ADA
Diarrhea	HLA-B
Diarrhea	HMBS
Diarrhea	HMGCS2
Diarrhea	HNF4A
Diarrhea	ALAD
Diarrhea	CDKN1A
Diarrhea	GNS
Diarrhea	GALT
Diarrhea	GLA
Diarrhea	SUGCT
Diarrhea	AIRE
Diarrhea	DCLRE1C
Diarrhea	CHPT1
Diarrhea	DHDDS
Diarrhea	EGFR
Diarrhea	ABCG2
Diarrhea	STX2
Diarrhea	CFTR
Diarrhea	DPYD
Diarrhea	SLC6A4
Diarrhea	ABCC2
Diarrhea	KLB
Diarrhea	ABCB1
Diarrhea	STX1A
Diarrhea	PRSS57
Diarrhea	FGFR4
Diarrhea	NAPSA
Diarrhea	TAB3
Diarrhea	SLC9A3R1
Diarrhea	NAA25
Diarrhea	NCKAP1
Diarrhea	CDA
Diarrhea	AZI2
Diarrhea	IL10
Diarrhea	AFA
Diarrhea	CFH
Diarrhea	TYMS
Diarrhea	GPT
Diarrhea	ACOT8
Diarrhea	TNF
Diarrhea	NAP1L1
Diarrhea	TRMO
Diarrhea	TAC1
Diarrhea	SCT
Diarrhea	BRAF
Diarrhea	NR1I2
Diarrhea	UMPS
Diarrhea	TPH1
Diarrhea	FGF19
Diarrhea	SLC10A2
Diarrhea	MBL2
Diarrhea	FAAH
Diarrhea	NOS2
Diarrhea	F2RL1
Diarrhea	OR2AG1
Diarrhea	TDH
Diarrhea	PRM3
Diarrhea	UGT1A9
Diarrhea	IL1B
Diarrhea	ERBB2
Diarrhea	SAT1
Diarrhea	HTR3A
Diarrhea	USE1
Diarrhea	CES1
Diarrhea	SLC17A5
Diarrhea	SLC26A2
Diarrhea	KLK4
Diarrhea	SLC52A1
Diarrhea	ERVK-19
Diarrhea	MFT2
Diarrhea	SETD1A
Diarrhea	RAPGEF3
Diarrhea	AIM2
Diarrhea	CLDN2
Diarrhea	IL1RL1
Diarrhea	KLHL1
Diarrhea	SLC9A3R2
Diarrhea	TNMD
Diarrhea	ANKS1B
Diarrhea	ERVK-11
Diarrhea	PDZD3
Diarrhea	2020-03-05
Diarrhea	KCNQ5
Diarrhea	UGT1A7
Diarrhea	SLC45A2
Diarrhea	SPINT2
Diarrhea	IL22
Diarrhea	TPH2
Diarrhea	ADRM1
Diarrhea	NXPH1
Diarrhea	SDCBP2
Diarrhea	HTR3E
Diarrhea	CDRT1
Diarrhea	SLC9A8
Diarrhea	MIR29A
Diarrhea	MIR510
Diarrhea	SYCE1L
Diarrhea	UGT1A8
Diarrhea	SH2D3C
Diarrhea	PPP1R2C
Diarrhea	IL17D
Diarrhea	CDT1
Diarrhea	GDE1
Diarrhea	TLR8
Diarrhea	GPNMB
Diarrhea	FBXW10
Diarrhea	JPT1
Diarrhea	CPP
Diarrhea	MTHFR
Diarrhea	IL4
Diarrhea	GSTT1
Diarrhea	ABL1
Diarrhea	GNAS
Diarrhea	GLB1
Diarrhea	GCG
Diarrhea	GAST
Diarrhea	FAP
Diarrhea	F12
Diarrhea	IL6
Diarrhea	IL11
Diarrhea	INS
Diarrhea	ATP6
Diarrhea	MPO
Diarrhea	MME
Diarrhea	EPCAM
Diarrhea	LYZ
Diarrhea	LGALS3
Diarrhea	LEPR
Diarrhea	KRT8
Diarrhea	KIT
Diarrhea	DHFR
Diarrhea	ACE
Diarrhea	CHN1
Diarrhea	CEACAM5
Diarrhea	CDC42
Diarrhea	CAV2
Diarrhea	CAV1
Diarrhea	CASR
Diarrhea	CA5A
Diarrhea	BDNF
Diarrhea	APOE
Diarrhea	CLCN5
Diarrhea	CPB1
Diarrhea	CPB2
Diarrhea	CYP11B2
Diarrhea	CYP3A4
Diarrhea	CYP2D6
Diarrhea	CYP2B6
Diarrhea	CYP2A6
Diarrhea	CYP1A2
Diarrhea	CYLD
Diarrhea	CYLC2
Diarrhea	CTSB
Diarrhea	AKT1
Diarrhea	NHS
Diarrhea	PER2
Diarrhea	TOP2A
Diarrhea	TLR3
Diarrhea	TJP1
Diarrhea	THBS1
Diarrhea	TBCA
Diarrhea	MAP3K7
Diarrhea	ADAM17
Diarrhea	SULT2A1
Diarrhea	STAT3
Diarrhea	NR2C2
Diarrhea	TRH
Diarrhea	UCP1
Diarrhea	CES2
Diarrhea	ST8SIA2
Diarrhea	NR4A3
Diarrhea	ZIC3
Diarrhea	XRCC1
Diarrhea	VEGFA
Diarrhea	UGT2B7
Diarrhea	UGT1A
Diarrhea	SLC35A2
Diarrhea	ST2
Diarrhea	SPI1
Diarrhea	SLC26A4
Diarrhea	PDR
Diarrhea	SERPINB2
Diarrhea	SERPINE1
Diarrhea	OXA1L
Diarrhea	OPRM1
Diarrhea	TNFRSF11B
Diarrhea	ODC1
Diarrhea	NRAS
Diarrhea	PIGR
Diarrhea	PRNP
Diarrhea	PTGS2
Diarrhea	SLC12A3
Diarrhea	SLC9A1
Diarrhea	SCN5A
Diarrhea	SARS
Diarrhea	SAA1
Diarrhea	SAA@
Diarrhea	S100A10
Diarrhea	RNF2
Diarrhea	CPE
Diarrhea	NPR3
Nausea	OPRM1
Nausea	TNF
Nausea	ABCB1
Nausea	IFNG
Nausea	IFNA2
Nausea	TNFRSF10A
Nausea	POMC
Nausea	GLA
Nausea	MAX
Nausea	MDH2
Nausea	ALDOB
Nausea	TMEM127
Nausea	POLG
Nausea	TP53
Nausea	RET
Nausea	SAA1
Nausea	SDHA
Nausea	SDHB
Nausea	SDHC
Nausea	SDHD
Nausea	SLC1A3
Nausea	LPL
Nausea	SERPING1
Nausea	TYMP
Nausea	ETFA
Nausea	ETFB
Nausea	ETFDH
Nausea	FH
Nausea	FSHR
Nausea	KIF1B
Nausea	SLC7A7
Nausea	HMBS
Nausea	RRM2B
Nausea	VHL
Nausea	SDHAF2
Nausea	CYP2D6
Nausea	HTR3B
Nausea	SRY
Nausea	OR2AG1
Nausea	GPT
Nausea	SLC6A4
Nausea	CNR1
Nausea	UGT1A1
Nausea	CHRNB2
Nausea	ALDH2
Nausea	CHPT1
Nausea	DHDDS
Nausea	DRD2
Nausea	ACAD9
Nausea	SLC17A5
Nausea	ADH1B
Nausea	TRAP1
Nausea	GSTM1
Nausea	HRAS
Nausea	HTR3A
Nausea	UGT2B7
Nausea	NT5C
Dizziness	TECRL
Dizziness	NF2
Dizziness	NAGA
Dizziness	MYO7A
Dizziness	MYL2
Dizziness	MYD88
Dizziness	TPK1
Dizziness	MPL
Dizziness	KCNA1
Dizziness	JUP
Dizziness	PDGFB
Dizziness	RYR2
Dizziness	CNNM2
Dizziness	TET2
Dizziness	ADA2
Dizziness	DKK1
Dizziness	TRDN
Dizziness	SH2B3
Dizziness	VHL
Dizziness	TNXB
Dizziness	SLC1A3
Dizziness	JAK2
Dizziness	CASQ2
Dizziness	CALM3
Dizziness	CALM2
Dizziness	CALM1
Dizziness	CACNB4
Dizziness	CACNA1A
Dizziness	B2M
Dizziness	ATP1A2
Dizziness	COCH
Dizziness	EGF
Dizziness	EPOR
Dizziness	MVK
Dizziness	GATA2
Dizziness	GYG1
Dizziness	SIL1
Dizziness	CHRNA6
Dizziness	SLC17A5
Dizziness	IFNA1
Dizziness	IFNA13
Dizziness	CHRNA3
Dizziness	COMT
Dizziness	CHRNB4
Dizziness	CHRNB3
Dizziness	PAEP
Dizziness	CHRNB2
Dizziness	ABCB1
Dizziness	CHRNA7
Dizziness	CCL2
Dizziness	CHRNA4
Dizziness	SRY
Dizziness	BPPV
Headache	IL6
Headache	CSF3
Headache	GNRH1
Headache	IFNA2
Headache	OXT
Headache	MSX2
Headache	APP
Headache	EGF
Headache	MPL
Headache	MEN1
Headache	TGFB1
Headache	LRP5
Headache	KCNA1
Headache	VHL
Headache	JAK2
Headache	TP53
Headache	PTPN22
Headache	MVK
Headache	PDCD10
Headache	TTR
Headache	SLC2A1
Headache	ADA2
Headache	AIP
Headache	PTEN
Headache	LPIN2
Headache	THPO
Headache	SH2B3
Headache	SLC19A2
Headache	NPC1
Headache	DNAI1
Headache	VANGL1
Headache	CCM2
Headache	KRIT1
Headache	BRAF
Headache	NLRP12
Headache	FKRP
Headache	CTNNB1
Headache	CDH23
Headache	NLRC4
Headache	CNNM2
Headache	SOST
Headache	PIGT
Headache	EPOR
Headache	NLRP3
Headache	TET2
Headache	CYB5R3
Headache	CLCN2
Headache	COMT
Headache	CALCA
Headache	CACNA1A
Headache	HTR1B
Headache	SLC6A4
Headache	DRD2
Headache	PSEN1
Headache	WFS1
Headache	VWF
Headache	VIP
Headache	PDE5A
Headache	DOK7
Headache	VEGFA
Headache	TNF
Headache	EDNRA
Headache	ADORA1
Headache	DDC
Headache	ACE
Headache	CX3CR1
Headache	COL11A1
Headache	CNR1
Headache	CASR
Headache	ATP1A1
Headache	APOE
Headache	GNB3
Headache	HTR1A
Headache	IL2
Headache	SOD2
Headache	SOD1
Headache	SLC6A3
Headache	SCN1A
Headache	PTGS2
Headache	PRL
Headache	OPRM1
Headache	NOS3
Headache	NOS2
Headache	MTHFR
Headache	ADORA2A
Vomiting	ABCB1
Vomiting	TACR1
Vomiting	GNRH1
Vomiting	IFNA2
Vomiting	IFNG
Vomiting	ASPG
Vomiting	ALDH18A1
Vomiting	EGFR
Vomiting	ACADM
Vomiting	NAGS
Vomiting	PMM2
Vomiting	POLG
Vomiting	SAA1
Vomiting	SCNN1A
Vomiting	PPOX
Vomiting	SCNN1G
Vomiting	SLC1A3
Vomiting	ABCC8
Vomiting	SSR4
Vomiting	SLC6A8
Vomiting	SLC12A1
Vomiting	SLC22A5
Vomiting	SMPD1
Vomiting	SCNN1B
Vomiting	PCCB
Vomiting	MPI
Vomiting	MPV17
Vomiting	MUT
Vomiting	MVK
Vomiting	NDUFA1
Vomiting	NDUFB3
Vomiting	NDUFB9
Vomiting	NDUFS1
Vomiting	NDUFS2
Vomiting	NDUFS3
Vomiting	NDUFV1
Vomiting	NDUFS4
Vomiting	NDUFS6
Vomiting	NDUFV2
Vomiting	OTC
Vomiting	OXCT1
Vomiting	PCCA
Vomiting	NR3C2
Vomiting	HNF1A
Vomiting	SAR1B
Vomiting	TIMMDC1
Vomiting	FOXRED1
Vomiting	TRMU
Vomiting	TMEM126B
Vomiting	MCCC1
Vomiting	CDH23
Vomiting	MCCC2
Vomiting	NDUFAF5
Vomiting	SUGCT
Vomiting	NUBPL
Vomiting	PIGY
Vomiting	NDUFAF2
Vomiting	NDUFA11
Vomiting	MMAA
Vomiting	ACSF3
Vomiting	MMAB
Vomiting	NDUFAF1
Vomiting	NEUROG3
Vomiting	ATP6V0A4
Vomiting	TCN2
Vomiting	TNFRSF1A
Vomiting	TP53
Vomiting	UCP2
Vomiting	PPM1D
Vomiting	ELP1
Vomiting	DGAT1
Vomiting	ST3GAL5
Vomiting	AIP
Vomiting	SLC7A7
Vomiting	ZEB2
Vomiting	ALG3
Vomiting	MLYCD
Vomiting	NDUFAF3
Vomiting	OPLAH
Vomiting	NDUFAF4
Vomiting	RRM2B
Vomiting	BOLA3
Vomiting	ACADL
Vomiting	ALG11
Vomiting	CPOX
Vomiting	CPS1
Vomiting	CPT2
Vomiting	CTNS
Vomiting	CTNNB1
Vomiting	CYP11A1
Vomiting	CYP11B2
Vomiting	CYP24A1
Vomiting	DBT
Vomiting	DGUOK
Vomiting	DHCR7
Vomiting	DLD
Vomiting	TYMP
Vomiting	ETFA
Vomiting	ETFB
Vomiting	SERPING1
Vomiting	BTD
Vomiting	ACADVL
Vomiting	ACAT1
Vomiting	ACP2
Vomiting	ALAD
Vomiting	ALDOB
Vomiting	ALPL
Vomiting	AQP2
Vomiting	ARG1
Vomiting	ASL
Vomiting	ASS1
Vomiting	ATRX
Vomiting	AVP
Vomiting	AVPR2
Vomiting	BCKDHA
Vomiting	BCKDHB
Vomiting	BRAF
Vomiting	ETFDH
Vomiting	F12
Vomiting	LPL
Vomiting	LIPA
Vomiting	GLA
Vomiting	KCNJ11
Vomiting	KCNJ1
Vomiting	HMBS
Vomiting	IVD
Vomiting	HSD3B2
Vomiting	HPRT1
Vomiting	HNF4A
Vomiting	HMGCS2
Vomiting	HLCS
Vomiting	GCDH
Vomiting	GALT
Vomiting	HADH
Vomiting	FLNA
Vomiting	GALC
Vomiting	MET
Vomiting	MEN1
Vomiting	GHSR
Vomiting	GALE
Vomiting	CYP2D6
Vomiting	OPRM1
Vomiting	SLC17A5
Vomiting	OR2AG1
Vomiting	CASP3
Vomiting	UGT1A1
Vomiting	COMT
Vomiting	AFP
Vomiting	FAS
Vomiting	MME
Vomiting	HTR3A
Vomiting	HTR3D
Vomiting	MMS19
Vomiting	HTR3C
Vomiting	MC4R
Vomiting	FASLG
Vomiting	MSH2
Vomiting	GSTT1
Vomiting	PDE4D
Vomiting	CYP2E1
Vomiting	XPC
Vomiting	S100A8
Vomiting	PPT1
Vomiting	MAPK3
Vomiting	TAC1
Vomiting	RRM1
Vomiting	SRY
Vomiting	ERCC1
Vomiting	ERCC2
Vomiting	ERCC4
Vomiting	PDE4A
Vomiting	GSTM1
Vomiting	CASP8
Vomiting	DROSHA
Vomiting	CASP9
Vomiting	B3GAT1
Vomiting	CASR
Vomiting	CDH15
Vomiting	CNR2
Vomiting	CD160
Vomiting	TUBB3
Vomiting	DCAF7
Vomiting	GSTP1
Vomiting	EXO1
Vomiting	SET
Abdominal_pain	IFNA2
Abdominal_pain	SERPING1
Abdominal_pain	PRSS1
Abdominal_pain	GLA
Abdominal_pain	TNFRSF1A
Abdominal_pain	TLR4
Abdominal_pain	RFC2
Abdominal_pain	TSC1
Abdominal_pain	SAA1
Abdominal_pain	TP53
Abdominal_pain	SDHB
Abdominal_pain	SDHC
Abdominal_pain	SDHD
Abdominal_pain	SOX10
Abdominal_pain	SPINK1
Abdominal_pain	STAT4
Abdominal_pain	STK11
Abdominal_pain	TGFBR2
Abdominal_pain	RET
Abdominal_pain	REST
Abdominal_pain	PRTN3
Abdominal_pain	TRNH
Abdominal_pain	TRNL1
Abdominal_pain	TRNQ
Abdominal_pain	TRNS1
Abdominal_pain	TRNS2
Abdominal_pain	TRNW
Abdominal_pain	MVK
Abdominal_pain	NME1
Abdominal_pain	NRTN
Abdominal_pain	PIK3CA
Abdominal_pain	PMS1
Abdominal_pain	PMS2
Abdominal_pain	POLG
Abdominal_pain	PPOX
Abdominal_pain	PRSS2
Abdominal_pain	TSC2
Abdominal_pain	CLIP2
Abdominal_pain	PIGT
Abdominal_pain	ERAP1
Abdominal_pain	ADA2
Abdominal_pain	TET2
Abdominal_pain	ABCG5
Abdominal_pain	ABCG8
Abdominal_pain	PALB2
Abdominal_pain	NLRP12
Abdominal_pain	NLRP3
Abdominal_pain	SLC25A26
Abdominal_pain	DIS3L2
Abdominal_pain	IL23R
Abdominal_pain	SEMA3D
Abdominal_pain	H19
Abdominal_pain	UBAC2
Abdominal_pain	RRM2B
Abdominal_pain	SLC40A1
Abdominal_pain	MLH3
Abdominal_pain	WT1
Abdominal_pain	KLRC4
Abdominal_pain	BAZ1B
Abdominal_pain	TRIP13
Abdominal_pain	GTF2IRD1
Abdominal_pain	SEMA3C
Abdominal_pain	CLDN16
Abdominal_pain	POU6F2
Abdominal_pain	CTRC
Abdominal_pain	FAN1
Abdominal_pain	PALLD
Abdominal_pain	MLYCD
Abdominal_pain	PTPN22
Abdominal_pain	TBL2
Abdominal_pain	OPLAH
Abdominal_pain	IL12A-AS1
Abdominal_pain	TRNF
Abdominal_pain	ALAD
Abdominal_pain	DNASE1L3
Abdominal_pain	ECE1
Abdominal_pain	TYMP
Abdominal_pain	EDN3
Abdominal_pain	EDNRB
Abdominal_pain	EPOR
Abdominal_pain	EWSR1
Abdominal_pain	F5
Abdominal_pain	FSHR
Abdominal_pain	GBA
Abdominal_pain	GCGR
Abdominal_pain	GDNF
Abdominal_pain	ELN
Abdominal_pain	GHSR
Abdominal_pain	ABCA1
Abdominal_pain	CD55
Abdominal_pain	CTNNB1
Abdominal_pain	CTLA4
Abdominal_pain	ALDOB
Abdominal_pain	APC
Abdominal_pain	FAS
Abdominal_pain	BMPR1A
Abdominal_pain	BRCA1
Abdominal_pain	BRCA2
Abdominal_pain	C4A
Abdominal_pain	CASR
Abdominal_pain	SCARB2
Abdominal_pain	CDKN2A
Abdominal_pain	CEL
Abdominal_pain	CFTR
Abdominal_pain	CCR1
Abdominal_pain	CPA1
Abdominal_pain	CPOX
Abdominal_pain	GPC3
Abdominal_pain	GNA11
Abdominal_pain	IL12A
Abdominal_pain	JAK2
Abdominal_pain	KRAS
Abdominal_pain	MSH2
Abdominal_pain	ND6
Abdominal_pain	EPCAM
Abdominal_pain	MPL
Abdominal_pain	SMAD4
Abdominal_pain	MCM6
Abdominal_pain	MEFV
Abdominal_pain	MET
Abdominal_pain	LIMK1
Abdominal_pain	IL10
Abdominal_pain	COX1
Abdominal_pain	COX2
Abdominal_pain	ND5
Abdominal_pain	MSH6
Abdominal_pain	ND4
Abdominal_pain	ND1
Abdominal_pain	HLA-DPB1
Abdominal_pain	GTF2I
Abdominal_pain	HBB
Abdominal_pain	HFE
Abdominal_pain	HLA-B
Abdominal_pain	COX3
Abdominal_pain	HMBS
Abdominal_pain	HPS1
Abdominal_pain	MLH1
Abdominal_pain	BDNF
Abdominal_pain	SCN5A
Abdominal_pain	UGT1A1
Abdominal_pain	OCLN
Abdominal_pain	GPI
Abdominal_pain	UGT1A
Abdominal_pain	TAC1
Abdominal_pain	PPY
Abdominal_pain	GFRA2
Abdominal_pain	TRPV1
Abdominal_pain	OPRM1
Abdominal_pain	LPL
Abdominal_pain	UGT1A7
Abdominal_pain	UGT1A6
Abdominal_pain	CACNA1A
Sputum	COL3A1
Sputum	CTLA4
Sputum	DNASE1L3
Sputum	HLA-DPB1
Sputum	PRTN3
Sputum	PTPN22
Sputum	RSPH1
Viral_res_infection	IFNG
Viral_res_infection	IL10
Viral_res_infection	CLEC2D
Viral_res_infection	REM1
Viral_res_infection	TNF
Viral_res_infection	TLR3
Viral_res_infection	TLR2
Viral_res_infection	TRIM21
Viral_res_infection	CCL5
Viral_res_infection	CCL2
Viral_res_infection	MYD88
Viral_res_infection	KLRB1
Viral_res_infection	IL17A
Viral_res_infection	IL6
Viral_res_infection	IL1B
Viral_res_infection	FOXP3
