# Supplementary material
Source: publisher figshare collection journal article supplement (https://springernature.figshare.com/articles/dataset/_/12063372)
Supplement: Supplementary file 2 [file 1 › Supplementary Table 5.xlsx]

## Sheet: formula-symptom.target-enrichme
Table S5. The enrichment and proteins overlapped between ingredients-targeted and symptoms or disease-related proteins
Symptoms or disease	No. of proteins from DisGeNET	Proteins overlapping with those targeted by ingredients		P values
		No.	Proteins
Fever	172	21	IL6, IL2, IL1B, IL1A, PTGS2, IFNG, PTGES, HTR2A, TNF, CXCL8, PRSS1, NCF1, COL1A1, CCND1, BCL2, IL10, HSF1, PARP1, NFE2L2, CCL2, CD40LG	2.10027e-12
Coughing	92	8	EGFR, ADRB2, MMP9, PTGER3, IL1B, TOP2B, TGFB1, CXCL8	0.000164379
Myalgia	99	5	HADHB, IL10, TNF, IGF2, HMGCR	0.0213703
Fatigue	329	28	NR3C1, IL10, BCL2, SOD1, CCND1, PON1, DUOX2, INSR, MET, IL6, IL1B, TNF, SLC6A4, NOS2, CXCL8, IFNG, IL2, CRP, UGT1A1, ACHE, IL4, IGFBP3, HTR2A, E2F1, CREB1, PTGS2, MAPK14, PYGM	3.34049e-12
Dyspnea	187	13	SCN5A, SOD1, APOB, CAV1, LDLR, PON1, EGFR, GSTM1, ADRB2, SLC6A4, GSTP1, CXCL8, TGFB1	1.88149e-05
Dry cough	3	1	TNF	0.0501895
Anorexia	117	14	TNF, IL2, IL1B, TP53, CDKN2A, CCND1, SLC6A4, HTR2C, FASN, HTR2A, SIRT1, PTGES, ADIPOQ, IL6	1.33478e-08
Pharyngalgia	6	1	TNF	0.0952678
Diarrhea	328	38	IL1A, NR3C2, CXCL8, UGT1A1, ABCC8, STAT1, CD40LG, CDKN1A, EGFR, ABCG2, SLC6A4, ABCC2, IL10, TNF, NR1I2, NOS2, IL1B, ERBB2, HTR3A, CES1, UGT1A8, IL4, IL6, MPO, LYZ, CAV1, CYP3A4, CYP2B6, CYP1A2, AKT1, TOP2A, VEGFA, SERPINE1, OPRM1, ODC1, PTGS2, SCN5A, SAA1	1.02051e-20
Nausea	57	11	OPRM1, TNF, IFNG, TP53, SAA1, SLC6A4, UGT1A1, DRD2, ADH1B, GSTM1, HTR3A	2.99025e-09
Dizziness	53	3	CALM3, EGF, CCL2	0.0507063
Headache	85	17	IL6, APP, EGF, TGFB1, TP53, PTEN, SLC6A4, DRD2, VEGFA, TNF, IL2, SOD1, SLC6A3, PTGS2, OPRM1, NOS3, NOS2	7.54948e-14
Vomiting	185	19	IFNG, EGFR, ACADM, SAA1, ABCC8, NR3C2, TP53, HSD3B2, MET, OPRM1, CASP3, UGT1A1, HTR3A, FASLG, MAPK3, GSTM1, CASP8, CASP9, GSTP1	5.20642e-10
Abdominal_pain	152	10	PRSS1, SAA1, TP53, ECE1, CDKN2A, MET, IL10, SCN5A, UGT1A1, OPRM1	0.00025289
Sputum	7	1	COL3A1	0.109226
Viral respiratory infection	16	6	IFNG, IL10, TNF, CCL2, IL6, IL1B	1.73635e-07
