# Supplementary material
Source: publisher figshare collection journal article supplement (https://springernature.figshare.com/articles/dataset/_/12063372)
Supplement: Supplementary file 2 [file 1 › Supplementary Table 6.xlsx]

## Sheet: Sheet1
Table S6. Summary of important LCTE plants, chemical compounds, and protein targets for relieving each COVID-19 symptom and treating viral respiratory infection
Symptoms Or Disease	Plants	Ingredients	Targets
Fever	Gan Chao, Huang Qin	luteolin, quercetin, stigmasterol	PRSS1, PTGS2
Coughing	Gan Chao, Huang Qin	quercetin, luteolin, beta-sitosterol, stigmasterol, kaempferol	ADRB2, TOP2B
Myalgia	Ma Huang, Zhi Shi, Zi Wan	luteolin, kaempferol, quercetin	IL10, TNF
Fatigue	Zhi Shi, Gan Chao, Huang Qin, Ma Huang, Dong Hua	beta-sitosterol, quercetin, luteolin, kaempferol	NOS2, SCL64A, MAPK14, PTGS2, ACHE
Dyspnea	Zhi Shi, Gan Chao, Huang Qin	stigmasterol, beta-sitosterol, quercetin	ADRB2, SLC64A, SCN5A
Dry cough	Zi Wan, Ma Huang	kaempferol, quercetin, luteolin	TNF
Anorexia	Gan Chao, Huang Qin	luteolin, quercetin	SCL64A, HTR2A
Pharyngalgia	Ma Huang, Zi Wan	kaempferol, quercetin, luteolin	TNF
Diarrhea	Gan Chao, Huang Qin, Zhi Shi, Ma Huang	luteolin, beta-sitosterol, stigmasterol, kaempferol, wogonin, naringenin	SCN5A, NOS2, PTGS2
Nausea	Huang Qin, Ban Xia, Gan Chao, Ma Huang	beta-sitosterol, stigmasterol, kaempferol, quercetin, luteolin, naringenin	TP53, SCL64A, OPRM1
Dizzeiness	Gan Chao, Huang Qin	kaempferol, quercetin, isorhamnetin	CLAM3
Headache	Gan Chao, Huang Qin	luteolin, beta-sitosterol, stigmasterol, kaempferol, quercetin	SCL64A, NOS2, PTGS2
Vomiting	Shan Yao, Dong Hua, Zi Wan, Ban Xia, Gan Chao	beta-sitosterol, stigmasterol, kaempferol, luteolin, naringenin, quercetin	NR3C2, OPRM1, CASP3
Abdominal pain	Gan Chao, Huang Qin	beta-sitosterol, stigmasterol, luteolin	SCN5A, PPRSS1
Sputum	Zi Wan, Huang Qin, Dong Hua, Ban Xia, Gan Chao, Chai Hu, Ma Huang	quercetin	COL3A1
Viral respiratory infection	Ma Huang, Zi Wan	quercetin, kaempferol, luteolin	TNF, IL10, IL6
