# Supplementary material
Source: publisher figshare collection journal article supplement (https://springernature.figshare.com/articles/dataset/_/12063372)
Supplement: Supplementary file 2 [file 1 › Supplementary Table 7.xlsx]

## Sheet: general.effects
Table S7. Full list of KEGG pathways enriched for proteins targeted by LCTE chemical compounds
ID	Description	GeneRatio	BgRatio	pvalue	p.adjust	qvalue	geneID	Count
hsa05144	Malaria	44088	50/8016	1.3074e-17	1.09822e-15	3.02767e-16	3458/3586/7124/7097/6347/4615/3820/3569/3553	9
hsa05142	Chagas disease (American trypanosomiasis)	44088	102/8016	1.16052e-14	4.8742e-13	1.34376e-13	3458/3586/7124/7097/6352/6347/4615/3569/3553	9
hsa05321	Inflammatory bowel disease (IBD)	44057	65/8016	3.46304e-14	9.69651e-13	2.67322e-13	3458/3586/7124/7097/3605/3569/3553/50943	8
hsa05323	Rheumatoid arthritis	44057	93/8016	6.85732e-13	1.44004e-11	3.97003e-12	3458/7124/7097/6352/6347/3605/3569/3553	8
hsa05143	African trypanosomiasis	43996	37/8016	1.84838e-11	3.10528e-10	8.56091e-11	3458/3586/7124/4615/3569/3553	6
hsa05164	Influenza A	44057	170/8016	9.35679e-11	1.30995e-09	3.61139e-10	3458/7124/7098/6352/6347/4615/3569/3553	8
hsa04620	Toll-like receptor signaling pathway	44026	104/8016	1.60787e-10	1.92945e-09	5.31928e-10	7124/7098/7097/6352/4615/3569/3553	7
hsa05140	Leishmaniasis	43996	77/8016	1.8213e-09	1.91237e-08	5.27219e-09	3458/3586/7124/7097/4615/3553	6
hsa04657	IL-17 signaling pathway	43996	94/8016	6.16357e-09	5.75267e-08	1.58595e-08	3458/7124/6347/3605/3569/3553	6
hsa04060	Cytokine-cytokine receptor interaction	44057	294/8016	7.38707e-09	5.88183e-08	1.62156e-08	3458/3586/7124/6352/6347/3605/3569/3553	8
hsa05152	Tuberculosis	44026	180/8016	7.7024e-09	5.88183e-08	1.62156e-08	3458/3586/7124/7097/4615/3569/3553	7
hsa05146	Amoebiasis	43996	102/8016	1.01231e-08	7.08618e-08	1.95358e-08	3458/3586/7124/7097/3569/3553	6
hsa05168	Herpes simplex virus 1 infection	44088	491/8016	1.71659e-08	1.10918e-07	3.05789e-08	3458/7124/7098/7097/6352/6347/4615/3569/3553	9
hsa05135	Yersinia infection	43996	120/8016	2.70366e-08	1.6222e-07	4.47222e-08	3586/7124/6347/4615/3569/3553	6
hsa05134	Legionellosis	43965	57/8016	2.89812e-08	1.62295e-07	4.47429e-08	7124/7097/4615/3569/3553	5
hsa05133	Pertussis	43965	76/8016	1.25608e-07	6.59441e-07	1.81801e-07	3586/7124/4615/3569/3553	5
hsa04621	NOD-like receptor signaling pathway	43996	181/8016	3.15297e-07	1.55794e-06	4.29507e-07	7124/6352/6347/4615/3569/3553	6
hsa04061	Viral protein interaction with cytokine and cytokine receptor	43965	100/8016	5.00416e-07	2.33528e-06	6.4381e-07	3586/7124/6352/6347/3569	5
hsa05332	Graft-versus-host disease	43935	41/8016	5.68263e-07	2.51232e-06	6.9262e-07	3458/7124/3569/3553	4
hsa04659	Th17 cell differentiation	43965	107/8016	7.01951e-07	2.94819e-06	8.12785e-07	3458/3605/3569/3553/50943	5
hsa04668	TNF signaling pathway	43965	112/8016	8.81638e-07	3.36625e-06	9.2804e-07	7124/6352/6347/3569/3553	5
hsa05145	Toxoplasmosis	43965	112/8016	8.81638e-07	3.36625e-06	9.2804e-07	3458/3586/7124/7097/4615	5
hsa05161	Hepatitis B	43965	162/8016	5.47605e-06	1.99995e-05	5.51364e-06	7124/7098/7097/4615/3569	5
hsa01523	Antifolate resistance	43904	31/8016	1.85242e-05	6.48348e-05	1.78743e-05	7124/3569/3553	3
hsa04933	AGE-RAGE signaling pathway in diabetic complications	43935	100/8016	2.0739e-05	6.87742e-05	1.89603e-05	7124/6347/3569/3553	4
hsa05132	Salmonella infection	43965	214/8016	2.12872e-05	6.87742e-05	1.89603e-05	7124/7097/4615/3569/3553	5
hsa04625	C-type lectin receptor signaling pathway	43935	104/8016	2.42215e-05	7.53558e-05	2.07748e-05	3586/7124/3569/3553	4
hsa05020	Prion diseases	43904	35/8016	2.68614e-05	7.85776e-05	2.1663e-05	6352/3569/3553	3
hsa05163	Human cytomegalovirus infection	43965	225/8016	2.7128e-05	7.85776e-05	2.1663e-05	7124/6352/6347/3569/3553	5
hsa05330	Allograft rejection	43904	38/8016	3.45154e-05	9.6643e-05	2.66434e-05	3458/3586/7124	3
hsa04940	Type I diabetes mellitus	43904	43/8016	5.02327e-05	0.000136115	3.75253e-05	3458/7124/3553	3
hsa05322	Systemic lupus erythematosus	43935	133/8016	6.37351e-05	0.000167305	4.61241e-05	3458/3586/7124/6737	4
hsa05162	Measles	43935	138/8016	7.36247e-05	0.000187097	5.15807e-05	7097/4615/3569/3553	4
hsa05418	Fluid shear stress and atherosclerosis	43935	139/8016	7.57299e-05	0.000187097	5.15807e-05	3458/7124/6347/3553	4
hsa04217	Necroptosis	43935	162/8016	0.000137374	0.000329697	9.08938e-05	3458/7124/7098/3553	4
hsa04623	Cytosolic DNA-sensing pathway	43904	63/8016	0.000158338	0.000369456	0.000101855	6352/3569/3553	3
hsa05169	Epstein-Barr virus infection	43935	201/8016	0.000315272	0.000710277	0.000195816	7124/7097/4615/3569	4
hsa05130	Pathogenic Escherichia coli infection	43935	202/8016	0.000321316	0.000710277	0.000195816	7124/4615/3569/3553	4
hsa05235	PD-L1 expression and PD-1 checkpoint pathway in cancer	43904	89/8016	0.000440818	0.000949454	0.000261754	3458/7097/4615	3
hsa05131	Shigellosis	43935	236/8016	0.000580909	0.00121991	0.000336316	7124/6352/4615/3553	4
hsa04640	Hematopoietic cell lineage	43904	99/8016	0.00060258	0.00123455	0.000340353	7124/3569/3553	3
hsa04064	NF-kappa B signaling pathway	43904	102/8016	0.000657593	0.00131519	0.000362583	7124/4615/3553	3
hsa04660	T cell receptor signaling pathway	43904	104/8016	0.000696	0.00135963	0.000374835	3458/3586/7124	3
hsa04380	Osteoclast differentiation	43904	128/8016	0.00127277	0.00238867	0.000658531	3458/7124/3553	3
hsa05310	Asthma	43875	31/8016	0.00127965	0.00238867	0.000658531	3586/7124	2
hsa04932	Non-alcoholic fatty liver disease (NAFLD)	43904	149/8016	0.00197106	0.00359932	0.000992295	7124/3569/3553	3
hsa05160	Hepatitis C	43904	155/8016	0.0022069	0.00394424	0.00108739	3458/7124/7098	3
hsa04630	JAK-STAT signaling pathway	43904	162/8016	0.00250354	0.00438119	0.00120785	3458/3586/3569	3
hsa04672	Intestinal immune network for IgA production	43875	49/8016	0.00317868	0.00544916	0.00150227	3586/3569	2
hsa05170	Human immunodeficiency virus 1 infection	43904	212/8016	0.00535114	0.00898991	0.00247842	7124/7097/4615	3
hsa04612	Antigen processing and presentation	43875	78/8016	0.00788571	0.0129882	0.00358072	3458/7124	2
hsa05410	Hypertrophic cardiomyopathy (HCM)	43875	90/8016	0.010392	0.016787	0.004628	7124/3569	2
hsa04350	TGF-beta signaling pathway	43875	94/8016	0.0112966	0.017904	0.00493593	3458/7124	2
hsa04010	MAPK signaling pathway	43904	295/8016	0.0132819	0.0206608	0.00569596	7124/4615/3553	3
hsa04931	Insulin resistance	43875	108/8016	0.0147262	0.0224798	0.00619744	7124/3569	2
hsa04066	HIF-1 signaling pathway	43875	109/8016	0.0149865	0.0224798	0.00619744	3458/3569	2
hsa04068	FoxO signaling pathway	43875	131/8016	0.0212111	0.0307195	0.00846903	3586/3569	2
hsa04650	Natural killer cell mediated cytotoxicity	43875	131/8016	0.0212111	0.0307195	0.00846903	3458/7124	2
hsa05010	Alzheimer disease	43875	171/8016	0.0347965	0.0495408	0.0136579	7124/3553	2
