# Supplementary material
Source: publisher figshare collection journal article supplement (https://springernature.figshare.com/articles/dataset/_/12063372)
Supplement: Supplementary file 2 [file 1 › Supplementary Table 8.xlsx]

## Sheet: general.effects.do
Table S8. Full list of Disease Ontology enriched for proteins targeted by LCTE chemical compounds
ID	Description	GeneRatio	BgRatio	pvalue	p.adjust	qvalue	geneID	Count
DOID:3083	chronic obstructive pulmonary disease	66/275	220/8007	1.41078e-45	1.47427e-42	2.94037e-43	4843/5743/23411/3565/5468/154/6532/7422/596/847/1277/1401/3627/6347/1029/2152/2944/2950/3091/3162/3315/3383/3458/3586/3552/3553/3558/3569/3576/1543/1544/1545/50506/581/4780/6373/6517/6649/6696/4312/4313/4314/4318/4846/142/5328/5728/5970/5054/6647/6772/7040/7124/7412/7498/6590/4363/9370/2936/3791/4233/5111/2908/3320/3356/1432	66
DOID:850	lung disease	91/275	499/8007	1.07132e-43	5.59765e-41	1.11643e-41	4843/5742/5743/23411/3565/5468/154/6532/7157/7422/196/596/841/847/207/598/1277/1401/3627/857/6347/595/1029/1281/2065/2152/2353/2944/2950/3091/3162/3315/3383/3458/3481/3486/3586/3552/3553/3558/3569/3659/3576/1543/1544/1545/50506/1950/2064/581/1364/4780/6373/6517/6649/6696/4312/4313/4314/4318/653361/4792/4846/142/5327/5328/5728/5970/5054/6647/6772/7040/7056/7124/7412/7498/3551/6590/4363/9370/2936/3…	91
DOID:0060084	cell type benign neoplasm	87/275	475/8007	9.43892e-42	3.28789e-39	6.55757e-40	367/4843/5742/5743/6256/3284/3725/5468/2099/2100/890/4353/7157/7422/196/596/332/836/841/207/240/1277/1401/595/1026/1029/2944/2950/3091/3162/3458/3481/3486/3586/3553/3569/3757/5594/3576/1543/1950/1956/2064/581/1733/4780/6696/5595/4312/4313/4314/4318/4609/1728/4953/142/5328/5467/5728/11186/5925/5970/7040/7124/7153/891/5241/6530/1588/1385/3791/4170/4193/4233/5111/1019/331/356/27035/896/1803/126/1812…	87
DOID:18	urinary system disease	86/275	478/8007	1.38487e-40	3.61798e-38	7.21592e-39	4843/5742/5743/6256/3565/3725/5468/2099/148/154/4306/4353/7157/7422/836/231/207/650/1401/3627/6347/595/959/1026/1029/1281/2152/2353/2944/2950/3091/3162/3383/3458/3486/3586/3552/3553/3569/3576/1950/1956/2064/6696/4312/4313/4318/4609/4846/142/5328/5444/5465/5578/5579/5728/5970/860/6401/5054/6647/6772/7040/7124/7412/7498/6720/9370/2805/338/7076/9332/4233/5111/331/356/1559/760/2335/2539/2908/1129/147…	86
DOID:557	kidney disease	83/275	461/8007	4.50172e-39	8.32022e-37	1.65943e-37	4843/5742/5743/6256/3565/3725/5468/2099/148/154/4306/4353/7422/836/231/207/650/1401/3627/6347/595/959/1026/1029/1281/2152/2353/2944/2950/3091/3162/3383/3458/3486/3586/3552/3553/3569/3576/1950/1956/2064/6696/4312/4313/4318/4609/4846/142/5328/5444/5465/5578/5579/5728/5970/860/6401/5054/6647/6772/7040/7124/7412/7498/6720/9370/2805/338/7076/9332/4233/331/356/1559/760/2335/2539/2908/147/2155/146/2475	83
DOID:2349	arteriosclerosis	74/275	356/8007	4.77716e-39	8.32022e-37	1.65943e-37	367/5743/23411/5468/2099/2100/154/6532/4353/7157/7422/196/836/847/231/207/240/1401/6347/959/1029/2152/2950/3162/3315/3383/3458/3486/3586/3552/3553/3569/1950/3037/4780/6696/4312/4313/4314/4318/4846/5327/5328/5444/5465/6401/5054/6647/7040/7056/7124/7412/7498/4973/54658/9370/4547/1588/3156/3949/338/9332/3791/9536/356/1559/760/2335/27035/1889/3053/2155/4069/6288	74
DOID:10534	stomach cancer	66/275	274/8007	6.82324e-39	1.01861e-36	2.03158e-37	367/4843/5743/3725/5468/2100/890/4353/7157/596/332/836/6347/595/1026/1029/3091/3162/3309/3315/3383/3486/3586/3552/3553/3558/3569/3757/5594/3576/1956/2064/581/842/3099/6696/5595/4312/4313/4314/4318/4609/5328/5728/5894/5925/5970/6401/5054/6647/7040/7153/7498/6590/4363/572/3791/4170/4193/4233/5111/840/356/27113/1813/2475	66
DOID:2320	obstructive lung disease	69/275	308/8007	1.61258e-38	2.10643e-36	4.20118e-37	4843/5743/23411/3565/5468/154/6532/7422/596/847/598/1277/1401/3627/6347/1029/2152/2944/2950/3091/3162/3315/3383/3458/3586/3552/3553/3558/3569/3659/3576/1543/1544/1545/50506/581/4780/6373/6517/6649/6696/4312/4313/4314/4318/4846/142/5328/5728/5970/5054/6647/6772/7040/7056/7124/7412/7498/6590/4363/9370/2936/3791/4233/5111/2908/3320/3356/1432	69
DOID:10283	prostate cancer	79/275	425/8007	4.23167e-38	4.88447e-36	9.74189e-37	367/5743/6256/3565/3725/5468/2099/43/4353/7157/7422/596/332/841/207/598/1277/650/3627/857/6347/595/1026/1029/11200/2152/2944/2950/3091/3309/3315/3383/3458/3481/3486/3586/3558/3569/5594/3576/1950/1956/2064/55/581/6649/6696/5595/4312/4313/4318/4609/5328/5728/5894/5925/5970/860/5054/6647/7040/7124/891/3551/5599/8644/4363/1588/2194/572/4170/4193/4233/5111/331/4128/5580/896/6257	79
DOID:2348	arteriosclerotic cardiovascular disease	72/275	345/8007	4.67414e-38	4.88447e-36	9.74189e-37	367/5743/23411/5468/2099/2100/154/6532/4353/7157/7422/196/836/847/231/207/240/1401/6347/959/1029/2152/2950/3162/3315/3383/3486/3586/3552/3553/3569/1950/3037/4780/6696/4312/4313/4314/4318/4846/5327/5328/5444/5465/6401/5054/6647/7040/7056/7124/7412/7498/4973/9370/4547/1588/3156/3949/338/9332/3791/9536/356/1559/760/2335/27035/1889/3053/2155/4069/6288	72
DOID:120	female reproductive organ cancer	81/275	455/8007	1.12234e-37	1.06622e-35	2.12653e-36	367/5743/3284/3725/5468/2099/2100/3283/7157/7422/596/332/836/207/650/3627/857/595/1026/1029/2353/2950/3091/3315/3458/3481/3486/3586/3552/3569/3643/5594/3576/1950/1956/2064/9429/581/3037/4780/6517/5595/4312/4313/4314/4318/4609/4792/8856/5328/5444/5467/5728/5894/11186/5925/5970/5054/7040/7124/7153/5241/6590/4363/1588/7076/3791/4170/4193/4233/5111/1019/331/356/896/1803/983/3356/1432/1244/2475	81
DOID:3856	male reproductive organ cancer	79/275	435/8007	2.4827e-37	2.16202e-35	4.31206e-36	367/5743/6256/3565/3725/5468/2099/43/4353/7157/7422/596/332/841/207/598/1277/650/3627/857/6347/595/1026/1029/11200/2152/2944/2950/3091/3309/3315/3383/3458/3481/3486/3586/3558/3569/5594/3576/1950/1956/2064/55/581/6649/6696/5595/4312/4313/4318/4609/5328/5728/5894/5925/5970/860/5054/6647/7040/7124/891/3551/5599/8644/4363/1588/2194/572/4170/4193/4233/5111/331/4128/5580/896/6257	79
DOID:1936	atherosclerosis	71/275	344/8007	3.67204e-37	2.95176e-35	5.88716e-36	367/5743/23411/5468/2099/2100/154/6532/4353/7157/7422/196/836/847/231/207/240/1401/6347/959/1029/2152/2950/3162/3315/3383/3486/3586/3552/3553/3569/1950/3037/4780/6696/4312/4313/4314/4318/4846/5327/5328/5444/5465/6401/5054/6647/7040/7056/7124/7412/7498/4973/9370/4547/1588/3156/3949/338/9332/3791/9536/356/1559/760/2335/27035/1889/3053/2155/6288	71
DOID:201	connective tissue cancer	73/275	370/8007	7.37039e-37	5.50147e-35	1.09725e-35	367/4843/5743/3565/3725/5468/2099/2100/890/7157/7422/596/332/836/841/207/598/1277/650/857/595/1026/1029/2152/2944/2950/3091/3315/3383/3481/3486/3553/3569/5594/3576/1576/1956/7150/2064/581/3037/6696/5595/4312/4313/4314/4318/4609/8856/5328/5578/5728/11186/5925/5970/860/7124/7153/5599/4363/7076/1385/3791/4170/4193/4233/1019/5580/2335/1111/1432/347/2475	73
DOID:3393	coronary artery disease	70/275	348/8007	7.69462e-36	5.36058e-34	1.06915e-34	4843/5742/5743/3565/5468/2099/2100/154/6532/4353/7157/7422/240/1401/1509/3627/6347/959/1029/2152/2944/3091/3162/3383/3458/3486/3586/3552/3553/3569/5594/3576/1544/1576/6649/6696/5595/4312/4313/4314/4318/4846/1728/142/5327/5444/5465/6401/5054/6647/7040/7056/7124/7412/4973/54658/9370/3156/3949/338/9332/153/3791/1559/2335/3053/2155/126/151/125	70
DOID:0060100	musculoskeletal system cancer	77/275	439/8007	3.28066e-35	2.04459e-33	4.07785e-34	367/4843/5743/3565/3725/5468/2099/2100/890/8648/7157/7422/596/332/836/841/207/598/1277/650/857/595/1026/1029/2152/2944/2950/3091/3315/3383/3481/3486/3553/3569/5594/3576/1576/1956/7150/2064/581/3037/6373/6696/5595/4312/4313/4314/4318/4609/8856/5328/5578/5728/11186/5925/5970/860/7040/7124/7153/5599/4363/7076/9332/1385/3791/4170/4193/4233/1019/5580/2335/1111/1432/347/2475	77
DOID:654	overnutrition	67/275	322/8007	3.32613e-35	2.04459e-33	4.07785e-34	367/4988/5468/2099/2100/154/6531/6532/1401/6347/595/1029/1147/2152/3091/3383/3481/3486/3586/3552/3553/3569/3643/5594/3576/4780/6517/6696/4313/4314/4318/4846/1728/5444/5465/5467/6401/5054/7040/7124/7412/4973/5241/5599/6720/9370/4547/1588/2194/2805/3949/1066/338/153/351/1019/4128/150/2908/1803/3356/3358/1813/1135/239/6288/2475	67
DOID:374	nutrition disease	68/275	338/8007	8.98341e-35	5.21537e-33	1.04018e-33	367/4988/5468/2099/2100/154/6531/6532/1401/6347/595/1029/1147/2152/3091/3383/3481/3486/3586/3552/3553/3569/3643/5594/3576/4780/6517/6696/4313/4314/4318/4846/1728/5444/5465/5467/6401/5054/7040/7124/7412/4973/5241/5599/6720/9370/4547/1588/2194/2805/3949/1066/338/153/351/1019/4128/150/2908/1803/2155/3356/3358/1813/1135/239/6288/2475	68
DOID:9970	obesity	65/275	313/8007	4.67025e-34	2.56864e-32	5.12304e-33	367/4988/5468/2099/2100/154/6531/6532/1401/6347/595/1029/1147/3091/3383/3481/3486/3586/3552/3553/3569/3643/5594/3576/4780/6517/6696/4313/4314/4318/4846/1728/5444/5465/5467/6401/5054/7040/7124/7412/4973/5241/5599/6720/9370/4547/1588/2194/2805/3949/1066/338/153/351/1019/4128/150/2908/1803/3356/3358/1813/1135/239/6288	65
DOID:2237	hepatitis	75/275	431/8007	5.42883e-34	2.70149e-32	5.38802e-33	367/4843/5742/5743/6256/3565/3725/5468/2099/2932/7157/7422/596/332/841/240/3627/6347/1026/1029/2944/2950/3091/3162/3309/3383/3458/3481/3586/3552/3553/3558/3569/3659/5594/3576/1543/1956/581/1869/4780/6373/6696/5595/4313/4314/4318/4609/5328/5444/5465/5728/5894/5925/5970/6772/7040/7124/7412/5599/6720/9370/4547/2194/3949/4985/9536/4170/4193/356/3320/1803/1432/6288/2475	75
DOID:3908	non-small cell lung carcinoma	75/275	431/8007	5.42883e-34	2.70149e-32	5.38802e-33	5742/5743/3565/5468/2099/2100/154/7157/7422/196/596/332/207/598/650/857/1026/1029/2065/2152/2353/2697/2944/2950/3091/3162/3315/3481/3486/3553/3558/3569/5594/3576/1543/1544/1545/1956/2064/9429/1869/842/6696/5595/4313/4318/4609/1728/5328/5578/5728/5894/11186/5925/5970/7040/7124/7153/891/572/1385/3791/4170/4233/5111/331/5580/2335/1889/3320/1803/8061/6288/1244/2475	75
DOID:657	adenoma	67/275	340/8007	1.19257e-33	5.66471e-32	1.1298e-32	367/4843/5742/5743/3284/3725/5468/2099/2100/890/7157/7422/196/596/332/836/841/207/240/1401/595/1026/1029/2944/2950/3091/3162/3481/3486/3586/3569/3757/5594/3576/1543/1956/2064/581/1733/4780/4312/4313/4314/4318/4609/1728/4953/5467/5925/7040/7153/5241/1385/3791/4193/4233/5111/1019/356/27035/896/1803/126/1813/4133/239/2475	67
DOID:5517	stomach carcinoma	47/275	153/8007	8.81032e-33	4.00295e-31	7.98372e-32	4843/5743/3725/5468/2100/7157/596/332/836/6347/595/1026/1029/3091/3162/3309/3315/3383/3486/3586/3553/5594/3576/1956/2064/581/842/3099/6696/5595/4313/4314/4318/4609/5728/5894/5925/6647/7040/7153/3791/4233/5111/356/27113/1813/2475	47
DOID:28	endocrine system disease	71/275	399/8007	9.9759e-33	4.34367e-31	8.66328e-32	367/4843/5743/3565/5468/5644/2100/154/4306/4353/7157/7422/596/841/598/1277/1401/3627/6347/595/959/1026/1029/2152/2944/2950/3297/3315/3383/3458/3486/3586/3552/3553/3569/3643/3659/3576/1543/50506/1950/581/6373/6517/6696/4318/4846/5444/5465/5728/5970/6401/5054/6647/6772/7040/7124/7412/5530/8644/9370/1588/338/4233/356/760/150/2908/896/125/6833	71
DOID:2151	malignant ovarian surface epithelial-stromal neoplasm	61/275	286/8007	1.35866e-32	5.25852e-31	1.04879e-31	5743/3284/5468/2099/2100/3283/7157/7422/596/332/836/207/650/857/595/1026/1029/2353/2950/3091/3315/3481/3486/3586/3569/5594/3576/1950/1956/2064/581/3037/4780/6517/5595/4312/4313/4318/4609/4792/8856/5328/5444/5467/5728/5970/5054/7040/7124/7076/3791/4170/4193/1019/331/356/896/1803/983/1432/1244	61
DOID:2152	ovary epithelial cancer	61/275	286/8007	1.35866e-32	5.25852e-31	1.04879e-31	5743/3284/5468/2099/2100/3283/7157/7422/596/332/836/207/650/857/595/1026/1029/2353/2950/3091/3315/3481/3486/3586/3569/5594/3576/1950/1956/2064/581/3037/4780/6517/5595/4312/4313/4318/4609/4792/8856/5328/5444/5467/5728/5970/5054/7040/7124/7076/3791/4170/4193/1019/331/356/896/1803/983/1432/1244	61
DOID:4001	ovarian carcinoma	61/275	286/8007	1.35866e-32	5.25852e-31	1.04879e-31	5743/3284/5468/2099/2100/3283/7157/7422/596/332/836/207/650/857/595/1026/1029/2353/2950/3091/3315/3481/3486/3586/3569/5594/3576/1950/1956/2064/581/3037/4780/6517/5595/4312/4313/4318/4609/4792/8856/5328/5444/5467/5728/5970/5054/7040/7124/7076/3791/4170/4193/1019/331/356/896/1803/983/1432/1244	61
DOID:5844	myocardial infarction	60/275	279/8007	2.94041e-32	1.0974e-30	2.18873e-31	5742/5743/5468/2099/154/6532/4353/7157/7422/240/1401/1509/6347/959/2152/2944/3091/3162/3383/3458/3586/3552/3553/3569/5594/3576/1544/6649/5595/4312/4313/4314/4318/4846/142/5327/5444/5465/6401/5054/6647/7040/7056/7124/7412/4973/54658/9370/3156/338/9332/153/3791/1559/2335/3053/2155/126/151/125	60
DOID:0050736	autosomal dominant disease	71/275	409/8007	5.26135e-32	1.8959e-30	3.7813e-31	367/4129/2099/2100/2932/1017/54583/7157/7422/196/596/332/841/207/1277/857/6347/595/1026/1029/11200/2697/2944/2950/3091/3309/3383/3458/3481/3486/5594/1544/1545/1956/7150/2064/31/2002/581/6696/5595/4313/4609/4846/142/5327/5728/5894/11186/5925/5970/5054/6647/6772/7040/7124/7153/3551/5241/4363/1588/2194/338/1385/2048/4193/5111/10499/1111/4772/2475	71
DOID:2394	ovarian cancer	62/275	312/8007	2.8652e-31	9.98043e-30	1.99056e-30	5743/3284/5468/2099/2100/3283/7157/7422/596/332/836/207/650/857/595/1026/1029/2353/2950/3091/3315/3481/3486/3586/3569/5594/3576/1950/1956/2064/581/3037/4780/6517/5595/4312/4313/4318/4609/4792/8856/5328/5444/5467/5728/5970/5054/7040/7124/4363/7076/3791/4170/4193/1019/331/356/896/1803/983/1432/1244	62
DOID:3459	breast carcinoma	68/275	383/8007	3.24864e-31	1.09511e-29	2.18414e-30	5743/23411/5468/2099/2100/2932/890/6531/7157/7422/596/332/836/841/207/857/6347/595/959/1026/1029/11200/2950/3091/3297/3383/3458/3481/3486/3552/3553/3569/5594/3576/1543/1544/1956/2064/581/1869/4780/4824/5595/4312/4313/4318/4609/4953/5328/5728/11186/5925/5970/5054/7040/7124/7153/891/5241/1588/2194/572/3791/4193/4233/4128/3320/1432	68
DOID:3996	urinary system cancer	77/275	500/8007	3.71475e-31	1.2131e-29	2.41948e-30	367/4843/5743/6256/3565/5468/2099/4306/7157/7422/596/332/841/207/240/598/857/6347/595/959/1026/1029/2944/2950/3091/3309/3315/3481/3486/3552/3558/3569/3659/5594/3576/1543/1545/1950/1956/2064/581/1869/4780/6696/5595/4312/4313/4314/4318/4609/5328/5465/5467/5728/11186/5925/5970/5054/6772/7040/7124/891/8644/4363/9370/1588/6646/572/3791/5602/4193/4233/356/5580/896/3320/2475	77
DOID:3717	gastric adenocarcinoma	37/275	94/8007	2.08345e-30	6.59759e-29	1.31586e-29	4843/5743/3725/5468/2100/7157/596/836/595/1029/3091/3162/3315/3486/3553/5594/3576/1956/2064/581/842/3099/6696/5595/4313/4314/4609/5728/5894/6647/7040/7153/3791/5111/27113/1813/2475	37
DOID:680	tauopathy	71/275	434/8007	2.69758e-30	8.29109e-29	1.65362e-29	4843/5742/5743/6256/4129/5468/2099/2100/2932/43/154/6531/6532/4353/7157/7422/836/207/240/1401/1509/857/6347/959/1029/11200/2950/3162/3309/3383/3458/3586/3552/3553/3569/5594/3576/2002/581/5595/4846/142/5328/5444/5894/6647/7040/7124/4973/5530/5599/1588/3949/6646/7076/1814/153/351/356/4128/3320/1129/983/9546/3356/1432/1812/3358/239/347/2475	71
DOID:263	kidney cancer	71/275	437/8007	4.24209e-30	1.26657e-28	2.52612e-29	367/4843/5743/6256/3565/5468/2099/4306/7157/7422/596/332/841/207/240/598/857/6347/595/959/1026/1029/2944/3091/3309/3315/3481/3486/3558/3569/5594/3576/1543/1545/1950/1956/2064/581/1869/4780/6696/5595/4312/4313/4314/4318/4609/5328/5728/11186/5970/5054/6772/7040/7124/891/8644/4363/9370/1588/6646/572/3791/5602/4193/4233/356/5580/896/3320/2475	71
DOID:2621	autonomic nervous system neoplasm	66/275	375/8007	5.07719e-30	1.43396e-28	2.85998e-29	4843/4988/5743/23411/3725/2932/1017/6531/7157/7422/596/332/841/207/598/1509/6347/595/1026/1029/2152/2950/3091/3162/3309/3315/3458/3481/3553/3569/3757/5594/1950/1956/2002/581/1869/842/5595/4313/4318/4609/4846/1728/4953/5578/5728/11186/5925/6647/7124/7153/6530/5599/4363/1588/572/3791/4193/351/1019/27113/5580/4133/4772/2475	66
DOID:769	neuroblastoma	66/275	375/8007	5.07719e-30	1.43396e-28	2.85998e-29	4843/4988/5743/23411/3725/2932/1017/6531/7157/7422/596/332/841/207/598/1509/6347/595/1026/1029/2152/2950/3091/3162/3309/3315/3458/3481/3553/3569/3757/5594/1950/1956/2002/581/1869/842/5595/4313/4318/4609/4846/1728/4953/5578/5728/11186/5925/6647/7124/7153/6530/5599/4363/1588/572/3791/4193/351/1019/27113/5580/4133/4772/2475	66
DOID:184	bone cancer	54/275	243/8007	9.69748e-30	2.66681e-28	5.31884e-29	367/5743/3725/2099/2100/7157/7422/596/836/841/207/598/1277/650/857/1026/1029/2944/2950/3091/3315/3481/3486/5594/3576/1576/1956/7150/2064/581/3037/6696/5595/4312/4313/4314/4318/8856/5328/5578/5925/5970/860/7124/5599/4363/7076/3791/4193/4233/2335/1111/1432/2475	54
DOID:10652	Alzheimer's disease	70/275	430/8007	1.04338e-29	2.79571e-28	5.57594e-29	4843/5742/5743/6256/4129/5468/2099/2100/2932/43/154/6531/6532/4353/7157/7422/836/207/240/1401/1509/857/6347/959/1029/11200/2950/3162/3309/3383/3458/3586/3552/3553/3569/5594/3576/2002/581/5595/4846/142/5328/5444/5894/6647/7040/7124/4973/5530/1588/3949/6646/7076/1814/153/351/356/4128/3320/1129/983/9546/3356/1432/1812/3358/239/347/2475	70
DOID:4451	renal carcinoma	66/275	380/8007	1.15636e-29	3.02099e-28	6.02524e-29	367/4843/5743/6256/3565/5468/2099/4306/7157/7422/596/332/841/207/240/598/857/6347/595/959/1026/1029/2944/3091/3309/3315/3486/3558/3569/5594/3576/1543/1545/1950/1956/581/1869/4780/6696/5595/4312/4313/4314/4318/4609/5328/5728/11186/5970/5054/6772/7040/7124/891/8644/4363/9370/6646/3791/5602/4193/4233/356/5580/896/2475	66
DOID:10591	pre-eclampsia	57/275	278/8007	1.91659e-29	4.88497e-28	9.74288e-29	367/4843/5742/5743/3565/5468/2099/154/7422/847/1401/3627/6347/959/2152/2944/2950/3091/3162/3309/3315/3383/3458/3481/3586/3569/5594/3576/4780/6649/5595/4312/4313/4318/4846/5328/5444/5467/11186/6401/5054/6647/7040/7056/7124/7412/7498/4973/6530/9370/3791/356/27035/3053/2155/1432/5837	57
DOID:1192	peripheral nervous system neoplasm	67/275	396/8007	2.03681e-29	5.06777e-28	1.01075e-28	4843/4988/5743/23411/3725/2932/1017/6531/7157/7422/596/332/841/207/598/650/1509/6347/595/1026/1029/2152/2950/3091/3162/3309/3315/3458/3481/3553/3569/3757/5594/1950/1956/2002/581/1869/842/5595/4313/4318/4609/4846/1728/4953/5578/5728/11186/5925/6647/7124/7153/6530/5599/4363/1588/572/3791/4193/351/1019/27113/5580/4133/4772/2475	67
DOID:4450	renal cell carcinoma	62/275	342/8007	6.82967e-29	1.65977e-27	3.31034e-28	367/4843/5743/6256/3565/5468/2099/4306/7157/7422/596/332/841/207/598/857/6347/595/959/1026/1029/2944/3091/3309/3315/3486/3558/3569/5594/3576/1543/1950/1956/581/1869/4780/6696/5595/4312/4313/4314/4318/4609/5328/5728/11186/5970/5054/6772/7040/7124/891/8644/4363/9370/6646/5602/4193/4233/356/896/2475	62
DOID:37	skin disease	62/275	350/8007	2.65039e-28	6.29467e-27	1.25545e-27	367/6256/3565/5468/154/6532/7157/7422/596/836/841/847/240/1277/3627/857/6347/595/1026/1029/2152/2697/2944/2950/3162/3315/3383/3458/3486/3586/3552/3553/3569/5594/3576/1543/1544/1950/1956/581/5595/4312/4313/4314/4318/5328/5465/5970/6401/6647/7040/7124/9370/7076/3791/4233/5111/351/1803/1131/3356/2171	62
DOID:16	integumentary system disease	65/275	394/8007	7.65058e-28	1.77663e-26	3.54342e-27	367/6256/3565/5468/154/6532/4306/7157/7422/596/836/841/847/240/1277/3627/857/6347/595/1026/1029/2152/2697/2944/2950/3162/3315/3383/3458/3486/3586/3552/3553/3569/5594/3576/1543/1544/1950/1956/581/5595/4312/4313/4314/4318/4846/5328/5465/5970/6401/6647/7040/7124/9370/7076/3791/4233/5111/351/356/1803/1131/3356/2171	65
DOID:4607	biliary tract cancer	45/275	178/8007	2.44912e-27	5.56376e-26	1.10967e-26	4843/5743/5468/5644/2099/2100/7157/7422/596/332/207/857/595/1026/1029/3569/5594/1956/2064/9429/581/6696/5595/4312/4313/4314/4318/4609/1728/5467/5578/5728/5894/11186/5925/7040/7124/7153/3949/338/4170/4233/356/1244/2475	45
DOID:655	inherited metabolic disorder	59/275	331/8007	4.76281e-27	1.05896e-25	2.11206e-26	4843/5742/3725/4129/5468/2099/154/6531/6532/4353/7422/332/231/650/1401/6347/959/2944/2950/3162/3383/3458/3481/3586/3552/3569/3576/1544/1956/9429/6517/4314/4318/4846/8856/5444/5465/5467/6401/5054/6647/7040/7124/7412/7498/6720/54658/9370/4547/2194/3949/338/4233/2335/2539/2155/5837/779/1244	59
DOID:0060116	sensory system cancer	40/275	139/8007	1.04913e-26	2.19269e-25	4.37323e-26	367/4843/890/1017/7157/7422/596/332/836/841/207/595/1026/1029/11200/3091/3383/3458/3486/3553/3757/5594/2064/1869/5595/4313/4609/5894/11186/5925/860/4363/4193/5111/1019/3320/983/1131/1133/79400	40
DOID:2174	ocular cancer	40/275	139/8007	1.04913e-26	2.19269e-25	4.37323e-26	367/4843/890/1017/7157/7422/596/332/836/841/207/595/1026/1029/11200/3091/3383/3458/3486/3553/3757/5594/2064/1869/5595/4313/4609/5894/11186/5925/860/4363/4193/5111/1019/3320/983/1131/1133/79400	40
DOID:4195	hyperglycemia	40/275	139/8007	1.04913e-26	2.19269e-25	4.37323e-26	4843/5743/23411/3565/5468/332/207/1401/959/3091/3162/3383/3552/3569/3643/5594/3576/6517/6649/4609/653361/4846/5444/5465/5467/5728/5970/6401/5054/6647/7040/7124/7498/9370/2194/2805/3791/5580/1889/1803	40
DOID:3347	osteosarcoma	48/275	215/8007	1.62096e-26	3.32137e-25	6.62434e-26	5743/3725/2099/2100/7157/7422/596/836/841/207/598/1277/650/857/1026/1029/2944/2950/3091/3481/3486/5594/3576/1576/1956/7150/2064/581/3037/6696/5595/4313/4318/8856/5578/5925/5970/860/7124/5599/7076/3791/4193/4233/2335/1111/1432/2475	48
DOID:1037	lymphoblastic leukemia	67/275	443/8007	2.0121e-26	4.04354e-25	8.06467e-26	4843/5743/3565/2932/43/154/890/4353/7157/7422/196/596/841/207/598/6347/595/959/1026/1029/11200/2944/2950/3315/3458/3586/3553/3558/3569/5594/3576/1543/9429/581/862/4780/4313/4318/4609/1728/142/5327/5579/5728/5925/5970/5054/6772/7040/7124/7153/3551/4363/54658/2936/3791/4170/4193/4233/1019/356/5580/896/3320/1803/4986/2355	67
DOID:2043	hepatitis B	46/275	197/8007	2.56135e-26	5.0502e-25	1.00724e-25	367/4843/5743/6256/3565/3725/5468/2099/2932/7157/596/332/240/3627/6347/1026/1029/2950/3091/3162/3309/3458/3481/3586/3553/3558/3569/5594/4780/5595/4313/4314/4318/4609/5328/5728/5894/6772/7040/7124/5599/6720/9370/356/3320/1432	46
DOID:11934	head and neck cancer	50/275	239/8007	3.19014e-26	6.17352e-25	1.23128e-25	367/4843/5742/5743/54583/7157/7422/596/332/836/841/207/857/595/1026/1029/11200/2944/2950/3091/3486/3586/3569/1543/1545/1950/1956/2064/581/4312/4313/4314/4318/4609/5894/11186/5925/5970/6772/7040/7124/5599/8644/4363/54658/7076/4233/356/126/2475	50
DOID:5082	liver cirrhosis	48/275	220/8007	4.86551e-26	9.24448e-25	1.84377e-25	4843/3565/5468/890/4353/7157/7422/596/332/836/1401/3627/857/595/1026/1029/1147/2152/2944/2950/3383/3481/3486/3553/3569/3576/1543/1576/1950/1956/581/6517/4314/4318/11186/7040/7056/7124/7412/4363/9370/2805/3791/4193/5111/1019/2335/2475	48
DOID:26	pancreas disease	43/275	171/8007	4.95655e-26	9.24927e-25	1.84473e-25	5743/5468/5644/4306/4353/7422/1401/3627/6347/959/1029/2152/2944/2950/3297/3315/3383/3458/3586/3553/3569/3643/3576/1543/1950/6517/6696/4318/5444/5970/6401/5054/6647/6772/7040/7124/7412/5530/9370/338/760/125/6833	43
DOID:5683	hereditary breast ovarian cancer	48/275	222/8007	7.48488e-26	1.37223e-24	2.73685e-25	367/2099/2100/1017/54583/7157/7422/196/596/841/207/1277/857/595/1026/1029/11200/2944/2950/3091/3309/3458/3481/5594/1544/1545/1956/7150/2064/31/6696/5595/4609/142/5728/11186/5925/5970/6772/7040/7153/5241/1588/2194/2048/4193/10499/1111	48
DOID:936	brain disease	67/275	454/8007	8.80789e-26	1.58694e-24	3.16509e-25	367/4843/4988/1128/5743/6331/3565/2099/43/154/6531/6532/7422/836/841/1401/1509/3627/6347/2950/3383/3458/3486/3586/3552/3553/3558/3569/3643/3757/3576/1956/9429/4314/4318/4846/8856/5327/5444/6647/6772/7124/7412/2891/5241/4363/2936/3949/9332/1814/4193/351/356/1559/1129/2554/3356/1432/1132/3358/1813/151/1135/125/347/1244/2475	67
DOID:1542	head and neck carcinoma	49/275	235/8007	1.25238e-25	2.21819e-24	4.42409e-25	367/4843/5742/5743/54583/7157/7422/596/332/836/841/207/857/595/1026/1029/11200/2944/2950/3091/3486/3586/3569/1543/1545/1950/1956/2064/581/4312/4313/4314/4318/4609/5894/11186/5925/5970/6772/7040/7124/5599/8644/4363/7076/4233/356/126/2475	49
DOID:6713	cerebrovascular disease	36/275	116/8007	2.27568e-25	3.96348e-24	7.90501e-25	5743/3565/2099/4353/836/1401/6347/2152/2944/3091/3383/3486/3569/1543/6649/6696/4313/4314/4318/4846/5444/5970/6647/7040/7056/7124/4973/9370/3949/338/7076/351/356/2908/2155/125	36
DOID:1793	pancreatic cancer	56/275	319/8007	2.66762e-25	4.56995e-24	9.11458e-25	5743/3565/3725/2932/4353/7157/7422/596/332/841/207/857/959/1029/2152/3091/3309/3315/3458/3586/3552/3553/3558/3569/3576/1545/1956/2064/581/1869/4313/4318/4609/1728/4953/5327/5328/5728/5925/5970/7040/7124/7153/3551/2194/2048/4170/4193/4233/5111/331/356/760/7011/3320/4772	56
DOID:127	leiomyoma	33/275	95/8007	4.10645e-25	6.92136e-24	1.38044e-24	367/6256/5468/2099/2100/4353/7157/7422/596/1277/595/1026/1029/2944/3481/3553/3569/1543/1950/1956/581/5595/4313/142/5328/5728/7040/7124/5241/1588/5111/1812/1813	33
DOID:1883	hepatitis C	48/275	233/8007	7.33893e-25	1.21733e-23	2.42792e-24	4843/5743/3565/5468/7157/7422/841/3627/6347/1026/1029/3162/3383/3458/3481/3586/3552/3553/3558/3569/3659/5594/3576/1543/1956/1869/4780/6373/6696/5595/4318/5444/5465/5925/6772/7040/7124/6720/9370/4547/2194/3949/4170/4193/356/1803/6288/2475	48
DOID:326	ischemia	45/275	204/8007	1.23274e-24	2.01284e-23	4.01453e-24	4843/5743/6331/5468/154/54583/4353/7422/596/836/231/598/1277/1401/6347/959/3091/3309/3315/3383/3586/3757/3576/4318/4846/142/5327/5444/5465/6401/6647/7040/7056/7124/7498/5599/338/1385/153/3791/331/356/5580/1432/151	45
DOID:219	colon cancer	52/275	282/8007	1.59493e-24	2.56416e-23	5.11412e-24	5743/23411/3725/2932/43/7157/7422/596/332/836/841/207/598/857/595/1026/1029/2353/3091/3162/3297/3383/3458/3486/3586/3553/3576/1543/1956/581/842/3037/2920/4313/4318/4609/5728/6401/6772/7040/7124/572/5321/4193/4233/331/356/5580/3320/1803/1432/4772	52
DOID:9408	acute myocardial infarction	32/275	92/8007	2.139e-24	3.38676e-23	6.75475e-24	5743/5468/4353/7157/7422/1401/6347/959/2152/2944/3091/3162/3458/3586/3552/3553/3569/4313/4314/4318/4846/5054/7040/7124/4973/9370/3156/153/3791/2335/3053/2155	32
DOID:9256	colorectal cancer	52/275	287/8007	3.7845e-24	5.90269e-23	1.17727e-23	5743/23411/3725/2932/43/7157/7422/596/332/836/841/207/598/857/595/1026/1029/2353/3091/3162/3297/3383/3458/3486/3586/3553/3576/1543/1956/581/842/3037/2920/4313/4318/4609/5728/6401/6772/7040/7124/572/5321/4193/4233/331/356/5580/3320/1803/1432/4772	52
DOID:9538	multiple myeloma	50/275	264/8007	3.93762e-24	6.0512e-23	1.20689e-23	5743/3565/3725/5468/2932/7157/7422/596/332/841/207/598/1277/650/595/1029/2944/2950/3315/3383/3458/3586/3552/3553/3569/5594/1545/1576/9429/6696/4312/4313/4609/4792/1728/5328/11186/860/7040/7124/7412/5599/2048/3791/4170/4233/5111/356/3320/2475	50
DOID:5672	large intestine cancer	52/275	288/8007	4.48793e-24	6.78751e-23	1.35374e-23	5743/23411/3725/2932/43/7157/7422/596/332/836/841/207/598/857/595/1026/1029/2353/3091/3162/3297/3383/3458/3486/3586/3553/3576/1543/1956/581/842/3037/2920/4313/4318/4609/5728/6401/6772/7040/7124/572/5321/4193/4233/331/356/5580/3320/1803/1432/4772	52
DOID:10155	intestinal cancer	53/275	300/8007	4.54666e-24	6.78751e-23	1.35374e-23	5743/23411/3725/2932/43/7157/7422/596/332/836/841/207/598/857/595/1026/1029/2353/3091/3162/3297/3383/3458/3486/3586/3553/3576/1543/1956/2064/581/842/3037/2920/4313/4318/4609/5728/6401/6772/7040/7124/572/5321/4193/4233/331/356/5580/3320/1803/1432/4772	53
DOID:824	periodontitis	35/275	120/8007	1.16435e-23	1.71372e-22	3.41795e-23	4843/5743/3565/5468/2099/6532/4353/7422/836/1401/6347/1029/2944/3458/3586/3552/3553/3558/3569/3576/1543/4312/4313/4314/4318/4953/5327/6401/5054/7040/7124/7076/840/4069/4772	35
DOID:0060085	organ system benign neoplasm	49/275	262/8007	2.14776e-23	3.11724e-22	6.21721e-23	367/5743/3565/2099/2100/890/4353/7157/7422/196/596/332/598/1277/650/1401/857/595/1026/1029/2697/3091/3481/3486/3553/3558/3569/1956/2064/55/581/4313/4318/5327/5925/5054/6647/7040/5241/9370/1588/3791/4193/5111/356/896/1813/4133/6288	49
DOID:0070004	myeloma	54/275	323/8007	2.5293e-23	3.62071e-22	7.22135e-23	367/5743/3565/3725/5468/2932/7157/7422/596/332/841/207/598/1277/650/595/1029/2944/2950/3315/3383/3458/3586/3552/3553/3569/5594/3576/1545/1576/9429/6696/4312/4313/4609/4792/1728/5328/11186/860/7040/7124/7412/5599/2048/3791/4170/4233/5111/356/2335/3320/2155/2475	54
DOID:1398	parasitic infectious disease	38/275	150/8007	3.47465e-23	4.90677e-22	9.78636e-23	4843/5743/3565/154/7422/596/332/836/1401/3627/959/2152/2944/2950/3162/3383/3458/3586/3553/3558/3569/3659/5594/1543/5595/4312/653361/4846/7040/7124/5599/2936/4193/4233/356/2539/1432/6288	38
DOID:768	retinoblastoma	34/275	116/8007	4.39904e-23	6.04868e-22	1.20638e-22	367/4843/890/1017/7157/7422/332/836/841/207/595/1026/1029/11200/3091/3486/3553/3757/5594/2064/1869/5595/4609/5894/11186/5925/860/4363/4193/1019/983/1131/1133/79400	34
DOID:771	retinal cell cancer	34/275	116/8007	4.39904e-23	6.04868e-22	1.20638e-22	367/4843/890/1017/7157/7422/332/836/841/207/595/1026/1029/11200/3091/3486/3553/3757/5594/2064/1869/5595/4609/5894/11186/5925/860/4363/4193/1019/983/1131/1133/79400	34
DOID:3082	interstitial lung disease	40/275	170/8007	4.57176e-23	6.20453e-22	1.23747e-22	4843/5743/3565/5468/7422/841/847/207/3627/857/6347/595/1029/2065/2353/2950/3162/3458/3481/3486/3586/3552/3553/3569/3576/2064/4780/6649/4312/4313/4314/4318/653361/4792/5328/7040/7124/356/5580/2355	40
DOID:4960	bone marrow cancer	54/275	328/8007	5.4234e-23	7.26597e-22	1.44917e-22	367/5743/3565/3725/5468/2932/7157/7422/596/332/841/207/598/1277/650/595/1029/2944/2950/3315/3383/3458/3586/3552/3553/3569/5594/3576/1545/1576/9429/6696/4312/4313/4609/4792/1728/5328/11186/860/7040/7124/7412/5599/2048/3791/4170/4233/5111/356/2335/3320/2155/2475	54
DOID:4645	retinal cancer	34/275	118/8007	8.20302e-23	1.08508e-21	2.16415e-22	367/4843/890/1017/7157/7422/332/836/841/207/595/1026/1029/11200/3091/3486/3553/3757/5594/2064/1869/5595/4609/5894/11186/5925/860/4363/4193/1019/983/1131/1133/79400	34
DOID:5041	esophageal cancer	37/275	145/8007	1.03444e-22	1.35124e-21	2.69499e-22	367/5743/6256/5468/890/7157/7422/596/332/857/6347/595/1026/1029/2353/3309/3481/3486/3586/3576/1956/581/4312/4313/4314/4318/4609/5328/5925/6401/5054/7040/891/4193/4233/331/79400	37
DOID:3388	periodontal disease	36/275	139/8007	2.34431e-22	3.02444e-21	6.03213e-22	4843/5743/3565/5468/2099/6532/4353/7422/836/1401/6347/1029/2944/3458/3586/3552/3553/3558/3569/3576/1543/4312/4313/4314/4318/4953/5327/5328/6401/5054/7040/7124/7076/840/4069/4772	36
DOID:1575	rheumatic disease	41/275	188/8007	2.80654e-22	3.4504e-21	6.88168e-22	3565/2099/7422/332/836/841/207/1277/1401/3627/857/6347/3383/3458/3486/3586/3552/3553/3558/3569/3643/5594/7150/6696/5595/4312/4313/4318/4846/142/5328/5728/6647/7040/7124/7076/4233/1803/3356/1432/2355	41
DOID:403	mouth disease	41/275	188/8007	2.80654e-22	3.4504e-21	6.88168e-22	4843/5743/3565/5468/2099/6532/4353/7157/7422/332/836/1277/1401/6347/1029/2944/3091/3458/3586/3552/3553/3558/3569/3576/1543/4312/4313/4314/4318/4953/5327/5328/6401/5054/7040/7124/6590/7076/840/4069/4772	41
DOID:418	systemic scleroderma	41/275	188/8007	2.80654e-22	3.4504e-21	6.88168e-22	3565/2099/7422/332/836/841/207/1277/1401/3627/857/6347/3383/3458/3486/3586/3552/3553/3558/3569/3643/5594/7150/6696/5595/4312/4313/4318/4846/142/5328/5728/6647/7040/7124/7076/4233/1803/3356/1432/2355	41
DOID:419	scleroderma	41/275	188/8007	2.80654e-22	3.4504e-21	6.88168e-22	3565/2099/7422/332/836/841/207/1277/1401/3627/857/6347/3383/3458/3486/3586/3552/3553/3558/3569/3643/5594/7150/6696/5595/4312/4313/4318/4846/142/5328/5728/6647/7040/7124/7076/4233/1803/3356/1432/2355	41
DOID:4606	bile duct cancer	36/275	140/8007	3.06279e-22	3.67887e-21	7.33736e-22	5743/5468/5644/2099/2100/7157/7422/596/332/207/857/595/1026/1029/3569/1956/2064/581/6696/5595/4312/4314/4318/1728/5467/5578/5728/11186/7040/3949/338/4170/4233/356/1244/2475	36
DOID:4897	bile duct carcinoma	36/275	140/8007	3.06279e-22	3.67887e-21	7.33736e-22	5743/5468/5644/2099/2100/7157/7422/596/332/207/857/595/1026/1029/3569/1956/2064/581/6696/5595/4312/4314/4318/1728/5467/5578/5728/11186/7040/3949/338/4170/4233/356/1244/2475	36
DOID:854	collagen disease	42/275	201/8007	4.82426e-22	5.7288e-21	1.14259e-21	3565/2099/7422/332/836/841/207/1277/1401/3627/857/6347/1281/3383/3458/3486/3586/3552/3553/3558/3569/3643/5594/7150/6696/5595/4312/4313/4318/4846/142/5328/5728/6647/7040/7124/7076/4233/1803/3356/1432/2355	42
DOID:104	bacterial infectious disease	48/275	271/8007	7.49876e-22	8.80472e-21	1.75607e-21	4843/5742/5743/3565/3725/5468/7157/7422/596/240/1401/3627/6347/959/2152/2944/3383/3458/3586/3552/3553/3558/3569/3659/5594/3576/6373/5595/4312/4314/4318/5894/5970/5054/6772/7040/7056/7124/572/338/5321/7076/1385/4170/356/4048/1432/6288	48
DOID:4989	pancreatitis	33/275	117/8007	7.72714e-22	8.97207e-21	1.78944e-21	5743/5644/4353/7422/1401/3627/6347/1029/2152/2944/2950/3297/3315/3383/3458/3586/3553/3569/3576/1543/1950/6696/4318/5444/5970/6401/6647/7040/7124/5530/9370/760/125	33
DOID:1115	sarcoma	41/275	193/8007	8.10469e-22	9.30703e-21	1.85625e-21	5743/3565/7157/7422/596/332/841/857/595/1026/1029/2065/3091/3315/3481/3486/3553/3569/3576/1956/2064/6696/4312/4313/4314/4318/4609/142/5328/5728/11186/5925/5054/7124/1385/3791/4170/4193/4233/1432/2475	41
DOID:1074	kidney failure	37/275	156/8007	1.64326e-21	1.86652e-20	3.72271e-21	3565/2099/148/4353/7422/1401/6347/595/959/1026/2152/2944/3091/3383/3586/3552/3553/3569/6696/4312/4609/4846/142/5444/5465/5728/860/6401/5054/7040/6720/9370/338/9332/2335/147/146	37
DOID:0080000	muscular disease	58/275	408/8007	2.15391e-21	2.42025e-20	4.82709e-21	367/4843/4988/6331/4129/2099/2100/43/148/154/6532/4306/7157/7422/596/332/1401/3627/857/6347/959/1026/1029/2152/2697/3458/3486/3586/3552/3553/3569/3643/3576/2064/6696/4312/4313/4314/4318/4846/5444/5578/5894/5054/6647/7040/7124/9370/7076/153/4233/351/4128/5580/2908/1129/152/779	58
DOID:1520	colon carcinoma	38/275	168/8007	2.74472e-21	3.05131e-20	6.08571e-21	5743/23411/2932/7157/7422/332/841/207/857/595/1026/2353/3091/3162/3458/3486/3553/3576/1543/1956/581/842/3037/2920/4609/5728/6401/6772/7040/7124/4193/4233/331/356/5580/1803/1432/4772	38
DOID:1040	chronic lymphocytic leukemia	43/275	221/8007	2.87206e-21	3.15927e-20	6.30103e-21	4843/5743/3565/7157/7422/596/207/598/6347/595/959/1029/11200/2944/2950/3315/3458/3553/3558/3569/3576/581/4780/4318/4609/5327/5579/5728/5970/5054/6772/7040/7124/3551/2936/3791/4170/4193/1019/356/5580/3320/1803	43
DOID:423	myopathy	57/275	398/8007	3.51102e-21	3.78249e-20	7.54402e-21	367/4988/6331/4129/2099/2100/43/148/154/6532/4306/7157/7422/596/332/1401/3627/857/6347/959/1026/1029/2152/2697/3458/3486/3586/3552/3553/3569/3643/3576/2064/6696/4312/4313/4314/4318/4846/5444/5578/5894/5054/6647/7040/7124/9370/7076/153/4233/351/4128/5580/2908/1129/152/779	57
DOID:66	muscle tissue disease	57/275	398/8007	3.51102e-21	3.78249e-20	7.54402e-21	367/4988/6331/4129/2099/2100/43/148/154/6532/4306/7157/7422/596/332/1401/3627/857/6347/959/1026/1029/2152/2697/3458/3486/3586/3552/3553/3569/3643/3576/2064/6696/4312/4313/4314/4318/4846/5444/5578/5894/5054/6647/7040/7124/9370/7076/153/4233/351/4128/5580/2908/1129/152/779	57
DOID:1091	tooth disease	37/275	162/8007	6.69449e-21	7.13851e-20	1.42375e-20	4843/5743/3565/5468/2099/6532/4353/7422/836/1277/1401/6347/1029/2944/3458/3586/3552/3553/3558/3569/3576/1543/4312/4313/4314/4318/4953/5327/5328/6401/5054/7040/7124/7076/840/4069/4772	37
DOID:552	pneumonia	31/275	108/8007	8.11926e-21	8.57033e-20	1.70932e-20	5743/3565/7157/7422/1277/1401/6347/595/1029/1281/3162/3458/3486/3586/3552/3553/3569/3576/6649/6696/4312/4313/4318/5327/5328/5054/7040/7056/7124/3551/6590	31
DOID:5520	head and neck squamous cell carcinoma	38/275	174/8007	1.03183e-20	1.07826e-19	2.15055e-20	5743/54583/7157/7422/596/836/841/207/857/595/1026/1029/11200/2944/2950/3091/3586/3569/1956/2064/581/4312/4313/4314/4318/4609/5894/11186/5925/5970/6772/7040/5599/8644/7076/4233/126/2475	38
DOID:11612	polycystic ovary syndrome	37/275	166/8007	1.64607e-20	1.70311e-19	3.39679e-20	367/5468/2099/2100/2932/3283/154/7422/207/1401/959/2944/3162/3481/3586/3552/3553/3569/3643/1543/6517/8972/4313/4318/4846/5327/5444/5728/5921/5054/7124/8644/9370/1588/3156/7076/151	37
DOID:10952	nephritis	35/275	147/8007	1.90846e-20	1.95524e-19	3.89965e-20	4843/5742/5743/6256/3565/5468/4353/7422/836/231/1401/6347/959/1026/1029/1281/3383/3458/3486/3586/3569/6696/4313/4318/4846/5578/5579/5970/6401/5054/7040/7124/7412/4233/356	35
DOID:15	reproductive system disease	55/275	386/8007	2.52198e-20	2.55871e-19	5.10325e-20	367/5743/3565/2099/2100/4353/8648/7157/7422/196/596/332/847/6347/595/1026/1029/2152/2944/2950/3315/3383/3458/3481/3486/3586/3552/3553/3569/3576/1543/1956/55/4824/4312/4313/4314/4318/4846/5328/5578/5925/5970/6401/5054/7040/7124/5241/8644/1588/338/1814/3791/4193/356	55
DOID:50	thyroid gland disease	36/275	159/8007	3.21825e-20	3.23373e-19	6.44954e-20	4843/5743/3565/5468/2100/154/7157/7422/596/841/598/1277/3627/6347/595/3383/3458/3486/3586/3552/3553/3569/3659/3576/50506/581/6373/6517/5465/6401/5054/7040/7124/4233/356/896	36
DOID:1107	esophageal carcinoma	32/275	123/8007	5.04046e-20	5.01646e-19	1.00051e-19	5743/6256/5468/890/7157/7422/596/332/857/6347/595/1026/1029/2353/3309/3486/3586/3576/1956/581/4312/4313/4314/4609/6401/5054/7040/891/4193/4233/331/79400	32
DOID:8692	myeloid leukemia	34/275	142/8007	5.7371e-20	5.65591e-19	1.12805e-19	3725/4353/596/332/841/598/857/6347/595/1026/1029/3481/3553/3569/3757/3576/581/862/4313/4318/4609/5894/5925/6401/891/4363/5321/3791/4170/4193/331/356/10499/4069	34
DOID:229	female reproductive system disease	39/275	193/8007	5.89709e-20	5.75931e-19	1.14867e-19	367/5743/3565/2099/4353/7422/332/847/6347/595/1026/1029/2152/2950/3383/3458/3486/3586/3552/3553/3569/3576/4312/4313/4314/4318/4846/5328/5578/5925/5970/6401/7124/5241/1588/1814/3791/4193/356	39
DOID:3070	malignant glioma	40/275	207/8007	1.04828e-19	1.01431e-18	2.023e-19	5743/3565/3725/7157/596/332/836/841/207/598/6347/595/1026/1029/2065/2944/2950/3309/3383/3481/3569/3576/581/842/4312/4313/4314/4318/4609/5328/5894/5925/5054/3791/4193/4233/351/356/896/4133	40
DOID:8398	osteoarthritis	38/275	187/8007	1.50086e-19	1.4389e-18	2.86983e-19	4843/23411/5468/2099/2100/7422/598/1277/1401/3091/3162/3309/3586/3552/3553/3569/5594/3576/6696/5595/4312/4313/4314/4318/5328/5444/5054/7040/7124/3551/9370/1588/338/5321/9536/356/5580/1432	38
DOID:74	hematopoietic system disease	60/275	474/8007	1.54285e-19	1.46571e-18	2.92329e-19	367/4843/3565/54205/54583/4353/7157/7422/596/332/836/847/598/1401/3627/595/959/1026/2152/2944/2950/3162/3383/3458/3486/3586/3553/3558/3569/3576/1543/1576/581/1869/4313/4318/4609/4846/1728/142/5327/5328/5444/5054/7040/7056/7124/7412/54658/4233/331/356/760/2539/3320/2155/1131/1111/1244/2475	60
DOID:2600	laryngeal carcinoma	17/275	26/8007	1.86881e-19	1.75937e-18	3.509e-19	5743/596/332/836/857/1026/1029/3569/3576/4312/4318/4609/5925/891/572/5111/896	17
DOID:2596	larynx cancer	19/275	35/8007	2.03219e-19	1.89611e-18	3.78171e-19	5743/596/332/836/857/1026/1029/3569/3576/4312/4313/4318/4609/5728/5925/891/572/5111/896	19
DOID:0050338	primary bacterial infectious disease	42/275	238/8007	4.19629e-19	3.88064e-18	7.73978e-19	4843/5742/5743/3565/3725/5468/7157/7422/596/240/1401/3627/6347/959/2944/3383/3458/3586/3552/3553/3558/3569/3659/3576/6373/4312/4314/4318/5894/5970/5054/7040/7056/7124/572/338/1385/4170/356/4048/1432/6288	42
DOID:289	endometriosis	27/275	88/8007	4.28682e-19	3.92958e-18	7.8374e-19	367/5743/3565/332/847/6347/595/1026/1029/3383/3458/3486/3586/3552/3553/3569/3576/4312/4313/4314/4318/5328/5925/5970/3791/4193/356	27
DOID:750	peptic ulcer disease	24/275	66/8007	4.5971e-19	4.17737e-18	8.33159e-19	4843/5742/5743/5468/4353/7157/7422/1401/6347/2944/2950/3091/3586/3553/3558/3569/3576/4780/4314/4318/5328/6401/7040/7124	24
DOID:3770	pulmonary fibrosis	31/275	123/8007	5.51491e-19	4.96817e-18	9.90882e-19	5743/3565/5468/7422/207/3627/857/6347/595/1029/2065/2353/3162/3458/3481/3486/3552/3569/2064/4780/6649/4312/4313/4318/653361/5328/7040/7124/356/5580/2355	31
DOID:3620	central nervous system cancer	31/275	124/8007	7.1335e-19	6.37137e-18	1.27074e-18	5743/43/7157/7422/596/332/841/847/857/595/1026/1029/2152/3309/3481/1956/2064/4313/4318/4609/5328/5444/11186/5925/2194/3791/4233/5111/351/1803/4133	31
DOID:1168	familial hyperlipidemia	26/275	82/8007	7.87517e-19	6.9742e-18	1.39098e-18	5742/5468/2099/4353/231/6347/3586/3569/3576/1956/6517/4314/4318/5444/5465/5467/5054/6647/7124/7498/9370/4547/3949/338/2335/2155	26
DOID:0050890	synucleinopathy	40/275	220/8007	1.05027e-18	9.22292e-18	1.83947e-18	5743/4129/2099/2100/2932/43/6531/6532/7157/7422/836/598/1401/1029/2944/3162/3383/3458/3481/3586/3552/3553/3576/1543/2002/1869/842/4780/6696/4846/1728/142/5444/5925/6647/7124/1814/351/331/347	40
DOID:3454	brain infarction	23/275	62/8007	1.52267e-18	1.32599e-17	2.64463e-18	3565/4353/1401/6347/2152/2944/3383/3486/3569/1543/6649/4846/5444/5970/7040/7056/7124/9370/3949/338/2908/2155/125	23
DOID:1686	glaucoma	29/275	109/8007	1.58793e-18	1.37139e-17	2.73519e-18	2099/2100/154/7157/7422/596/836/598/857/1026/2697/2944/3309/3552/3553/1545/581/4312/4314/4318/4846/5444/5054/7040/7124/7498/3949/153/356	29
DOID:3910	lung adenocarcinoma	36/275	178/8007	1.7355e-18	1.48656e-17	2.96488e-18	5742/5743/3565/2099/2100/154/7157/7422/196/598/857/1029/2944/2950/3091/3162/3315/3569/5594/3576/1544/1545/1956/2064/1869/842/4318/4609/1728/5728/11186/5970/7040/4233/6288/2475	36
DOID:2994	germ cell cancer	54/275	410/8007	2.32552e-18	1.97575e-17	3.94054e-18	367/5743/6256/3565/3725/7157/596/332/841/847/598/857/595/1026/1029/2697/2946/3297/3309/3458/3481/3486/3586/3552/3558/3569/3659/3757/3576/1956/2064/581/4312/4313/4318/4609/5328/5728/5925/5970/860/5054/891/6590/4363/3359/3791/4170/4193/4233/5111/331/356/3320	54
DOID:9455	lipid storage disease	31/275	130/8007	3.1645e-18	2.66686e-17	5.31894e-18	4843/3725/5468/154/6531/6532/7422/332/1401/959/2944/2950/3162/3383/3586/3552/3569/4846/8856/5465/6401/5054/7040/7124/7412/6720/9370/4547/2194/338/4233	31
DOID:0060119	pharynx cancer	19/275	40/8007	5.62946e-18	4.70623e-17	9.38639e-18	332/836/6347/595/1026/1029/3458/3586/3569/3576/4312/4313/4609/891/4363/572/3791/4193/4233	19
DOID:0050737	autosomal recessive disease	48/275	334/8007	6.55652e-18	5.43775e-17	1.08454e-17	4843/5742/5743/3565/154/4353/7157/836/207/1277/1026/1029/2944/2950/3091/3162/3383/3458/3486/3586/3552/3553/3569/3576/1544/1576/581/1869/4780/4313/4318/4609/142/5328/5465/6401/6772/7040/7124/7412/6590/4363/54658/153/7299/2908/1432/2475	48
DOID:399	tuberculosis	33/275	156/8007	1.22237e-17	1.00581e-16	2.00604e-17	4843/3565/3725/5468/7157/596/240/1401/3627/6347/959/2944/3383/3458/3586/3552/3553/3558/3569/3659/3576/4312/4314/4318/5894/5970/7040/7124/1385/4170/356/4048/1432	33
DOID:4905	pancreatic carcinoma	40/275	237/8007	1.65806e-17	1.35365e-16	2.69979e-17	5743/3725/2932/7157/7422/596/207/857/959/1029/2152/3091/3315/3458/3586/3552/3553/3569/3576/1545/1956/2064/1869/4318/1728/4953/5327/5328/5728/7040/7124/7153/3551/2194/2048/4170/4193/4233/331/7011	40
DOID:299	adenocarcinoma	33/275	158/8007	1.84143e-17	1.4917e-16	2.97513e-17	5743/3725/2932/7157/7422/596/836/847/857/595/1026/1029/3091/3315/3458/3586/3553/1956/2064/581/4312/4313/4318/5328/5728/5925/6401/6647/7124/4363/5111/331/2475	33
DOID:4896	bile duct adenocarcinoma	30/275	128/8007	1.92732e-17	1.53744e-16	3.06637e-17	5743/5468/5644/7157/7422/596/332/207/595/1029/3569/1956/2064/581/6696/5595/4312/4314/4318/1728/5467/5578/5728/11186/7040/4170/4233/356/1244/2475	30
DOID:4947	cholangiocarcinoma	30/275	128/8007	1.92732e-17	1.53744e-16	3.06637e-17	5743/5468/5644/7157/7422/596/332/207/595/1029/3569/1956/2064/581/6696/5595/4312/4314/4318/1728/5467/5578/5728/11186/7040/4170/4233/356/1244/2475	30
DOID:3146	lipid metabolism disorder	26/275	92/8007	1.98108e-17	1.56836e-16	3.12803e-17	5742/5468/2099/4353/231/6347/3586/3569/3576/1956/6517/4314/4318/5444/5465/5467/5054/6647/7124/7498/9370/4547/3949/338/2335/2155	26
DOID:0050700	cardiomyopathy	32/275	149/8007	2.44969e-17	1.92476e-16	3.83885e-17	367/6331/2099/2100/154/4306/7157/332/1401/6347/959/2152/2697/3458/3486/3553/3569/2064/6696/4312/4313/4314/4318/4846/5894/5054/7040/7124/9370/153/1129/152	32
DOID:6000	congestive heart failure	39/275	229/8007	3.16687e-17	2.46968e-16	4.92569e-17	6331/5468/148/154/6532/4353/7157/7422/1401/959/2152/2697/3162/3383/3458/3586/3569/3757/2064/6517/6649/6696/4312/4313/4318/4846/142/6647/6772/7040/7124/7412/54658/9370/153/147/1432/152/79400	39
DOID:3069	astrocytoma	28/275	112/8007	3.86253e-17	2.98988e-16	5.9632e-17	5743/7157/596/332/836/207/598/6347/595/1026/1029/2065/3383/3481/3569/3576/581/842/4312/4314/4318/4609/5328/5894/5925/4193/351/4133	28
DOID:10286	prostate carcinoma	29/275	122/8007	4.5209e-17	3.44843e-16	6.87775e-17	367/5743/6256/5468/2099/7157/7422/596/841/1277/857/2152/2950/5594/1950/1956/2064/581/6696/5595/4313/4609/5328/5728/5970/5599/8644/1588/4233	29
DOID:10825	essential hypertension	29/275	122/8007	4.5209e-17	3.44843e-16	6.87775e-17	3284/5468/3283/148/154/6532/7422/847/1401/2944/3162/3586/3552/3553/3569/3643/6649/4313/4318/4846/5327/7040/9370/1588/338/153/1812/151/239	29
DOID:9261	nasopharynx carcinoma	18/275	38/8007	4.61385e-17	3.49382e-16	6.96829e-17	332/836/6347/595/1026/1029/3458/3586/3569/3576/4312/4313/4609/891/4363/572/3791/4193	18
DOID:4766	embryoma	48/275	352/8007	5.81734e-17	4.37347e-16	8.7227e-17	367/5743/6256/3565/3725/596/332/841/847/598/857/595/1026/1029/3297/3309/3458/3481/3486/3586/3552/3558/3569/3659/3757/3576/581/4312/4313/4318/4609/5328/5925/5970/860/5054/891/6590/4363/3359/3791/4170/4193/4233/5111/331/356/3320	48
DOID:4362	cervical cancer	27/275	105/8007	6.65948e-17	4.97082e-16	9.91411e-17	5743/3725/7157/596/332/207/595/1026/1029/3569/5594/1956/581/5595/4312/4313/4314/4318/4609/5728/5894/11186/5925/7153/6590/3791/4233	27
DOID:0060036	intrinsic cardiomyopathy	30/275	135/8007	9.47249e-17	7.02039e-16	1.40019e-16	367/6331/2099/2100/154/4306/7157/332/1401/6347/959/2697/3458/3486/3553/3569/2064/4312/4313/4314/4318/4846/5894/5054/7040/7124/9370/153/1129/152	30
DOID:6364	migraine	23/275	73/8007	1.0337e-16	7.60714e-16	1.51721e-16	367/4843/2099/154/6531/6532/7422/3383/3552/3553/3569/3643/4314/4318/4846/5444/7124/5241/3949/1814/3356/3358/151	23
DOID:633	myositis	24/275	81/8007	1.07011e-16	7.82001e-16	1.55967e-16	4988/4129/148/154/6532/4306/7422/6347/3458/3486/3586/3552/3553/3569/3576/4313/4318/4846/5444/7124/4233/351/4128/2908	24
DOID:9119	acute myeloid leukemia	27/275	107/8007	1.12414e-16	8.15782e-16	1.62705e-16	4353/596/332/841/598/857/6347/1029/3553/3569/3757/3576/581/862/4313/4318/4609/5894/5925/6401/891/4363/5321/4193/331/10499/4069	27
DOID:1781	thyroid cancer	37/275	213/8007	1.13328e-16	8.16743e-16	1.62896e-16	5743/6256/3565/5468/2099/2100/7157/7422/596/332/207/6347/595/1026/1029/2944/3091/3586/1950/1956/2064/6696/4313/4318/5328/5728/5925/860/7040/5599/7076/3791/4193/4233/331/2335/2475	37
DOID:688	embryonal cancer	49/275	373/8007	1.24758e-16	8.92961e-16	1.78097e-16	367/5743/6256/3565/3725/596/332/841/847/598/857/595/1026/1029/3297/3309/3458/3481/3486/3586/3552/3558/3569/3659/3757/3576/1956/581/4312/4313/4318/4609/5328/5925/5970/860/5054/891/6590/4363/3359/3791/4170/4193/4233/5111/331/356/3320	49
DOID:3211	lysosomal storage disease	31/275	150/8007	2.54938e-16	1.81232e-15	3.61459e-16	4843/3725/5468/154/6531/6532/7422/332/1401/959/2944/2950/3162/3383/3586/3552/3569/4846/8856/5465/6401/5054/7040/7124/7412/6720/9370/4547/2194/338/4233	31
DOID:526	Human immunodeficiency virus infectious disease	33/275	173/8007	3.25866e-16	2.30088e-15	4.58901e-16	23411/3565/2099/2932/7157/596/332/841/3627/857/6347/959/2152/3309/3315/3383/3458/3586/3558/3659/1576/581/6373/7040/7124/7412/6590/5599/5111/356/2539/2908/1803	33
DOID:12365	malaria	26/275	103/8007	4.22034e-16	2.95991e-15	5.90341e-16	4843/5743/3565/154/7422/1401/3627/959/2944/2950/3162/3383/3458/3586/3553/3558/3569/3659/4312/653361/4846/7124/2936/4233/2539/6288	26
DOID:14330	Parkinson's disease	34/275	187/8007	5.18252e-16	3.61049e-15	7.20098e-16	5743/4129/2099/2100/43/6531/6532/7157/7422/836/598/1401/1029/2944/3162/3458/3481/3586/3552/3553/3576/1543/1869/842/4780/1728/142/5444/5925/6647/7124/1814/331/347	34
DOID:2893	cervix carcinoma	26/275	104/8007	5.4571e-16	3.7766e-15	7.53228e-16	5743/3725/7157/596/332/207/595/1026/1029/3569/5594/1956/581/5595/4312/4313/4314/4318/4609/5728/5894/11186/5925/6590/3791/4233	26
DOID:631	fibromyalgia	14/275	22/8007	5.73071e-16	3.93987e-15	7.85791e-16	4988/4129/148/154/6532/4306/3486/3586/3553/3576/4846/5444/4128/2908	14
DOID:3963	thyroid carcinoma	35/275	200/8007	6.43206e-16	4.39314e-15	8.76194e-16	5743/6256/5468/2099/2100/7157/7422/596/332/207/6347/595/1026/1029/2944/3091/1950/1956/2064/6696/4313/4318/5328/5728/5925/860/7040/5599/7076/3791/4193/4233/331/2335/2475	35
DOID:11054	urinary bladder cancer	26/275	107/8007	1.15787e-15	7.85695e-15	1.56704e-15	5743/7157/7422/332/857/595/1026/1029/2950/3481/3552/3659/3576/2064/581/4312/4313/4318/4609/5328/5465/5467/5925/7040/4193/356	26
DOID:883	parasitic helminthiasis infectious disease	17/275	38/8007	1.18695e-15	8.00237e-15	1.59604e-15	3565/7422/596/836/2152/3383/3458/3586/3558/5594/1543/5595/7124/5599/4193/356/1432	17
DOID:2789	parasitic protozoa infectious disease	28/275	127/8007	1.32309e-15	8.86299e-15	1.76769e-15	4843/5743/3565/154/7422/1401/3627/959/2944/2950/3162/3383/3458/3586/3553/3558/3569/3659/4312/653361/4846/7040/7124/2936/4233/356/2539/6288	28
DOID:4948	gallbladder carcinoma	19/275	51/8007	1.47839e-15	9.84021e-15	1.96259e-15	4843/5743/2100/7157/7422/595/1029/5594/1956/2064/9429/5595/4313/4609/5894/5925/7124/7153/356	19
DOID:1485	cystic fibrosis	29/275	138/8007	1.55709e-15	1.02984e-14	2.05398e-15	4843/5742/5743/3565/154/4353/1277/2950/3091/3162/3383/3458/3486/3586/3552/3553/3569/3576/581/4780/4318/5328/5465/6772/7040/7124/6590/153/2908	29
DOID:4074	pancreas adenocarcinoma	31/275	161/8007	2.08943e-15	1.37324e-14	2.73887e-15	5743/3725/2932/7157/596/207/857/959/1029/2152/3091/3552/3553/3569/1545/1956/2064/4318/1728/4953/5327/5328/5728/7040/7124/7153/3551/2194/4193/4233/331	31
DOID:3121	gallbladder cancer	19/275	52/8007	2.25857e-15	1.47513e-14	2.94208e-15	4843/5743/2100/7157/7422/595/1029/5594/1956/2064/9429/5595/4313/4609/5894/5925/7124/7153/356	19
DOID:5679	retinal disease	46/275	358/8007	2.89723e-15	1.8805e-14	3.75058e-15	4843/2099/2100/154/7157/7422/596/836/598/1401/857/6347/1026/2697/2944/2950/3091/3309/3383/3458/3486/3552/3553/3569/3576/1545/581/4312/4313/4314/4318/4846/5444/6401/5054/6647/7040/7124/7412/7498/9370/3949/153/3791/356/6010	46
DOID:865	vasculitis	27/275	122/8007	3.96046e-15	2.55474e-14	5.09533e-15	4843/3565/2100/4353/7422/6347/2944/2950/3091/3162/3383/3458/3586/3552/3553/3558/3569/3659/3576/1543/4313/4318/4792/4846/6401/7056/7124	27
DOID:9452	fatty liver disease	24/275	95/8007	5.90535e-15	3.78594e-14	7.55091e-15	3725/5468/154/7422/332/1401/959/2944/2950/3162/3383/3586/3552/8856/5465/5054/7040/7124/6720/9370/4547/2194/338/4233	24
DOID:784	chronic kidney failure	21/275	70/8007	7.13442e-15	4.54602e-14	9.06685e-15	3565/2099/148/4353/6347/2944/3091/3383/3586/3552/3553/3569/4846/5444/5465/6401/5054/7040/338/147/146	21
DOID:3371	chondrosarcoma	20/275	63/8007	9.39561e-15	5.95055e-14	1.18681e-14	5743/5468/7422/207/598/650/1029/3091/3569/5594/5595/4312/4313/4314/4318/5925/860/7124/1019/5580	20
DOID:3526	cerebral infarction	19/275	56/8007	1.10974e-14	6.98605e-14	1.39334e-14	3565/1401/2152/2944/3383/3486/3569/1543/6649/4846/5444/5970/7040/7124/3949/338/2908/2155/125	19
DOID:5409	lung small cell carcinoma	21/275	72/8007	1.34451e-14	8.41323e-14	1.67798e-14	5743/4353/7157/7422/596/332/841/857/595/1026/1029/3383/3576/2064/4313/4318/5328/5925/4233/2908/4133	21
DOID:5100	middle ear disease	15/275	31/8007	1.3725e-14	8.53728e-14	1.70273e-14	4843/7422/650/1026/1029/3458/3586/3553/3569/3576/1950/1956/4313/4318/5054	15
DOID:8466	retinal degeneration	38/275	261/8007	1.73695e-14	1.07403e-13	2.14211e-14	4843/2099/2100/154/7157/7422/596/836/598/1401/857/6347/1026/2697/2944/2950/3091/3309/3383/3552/3553/1545/581/4312/4314/4318/4846/5444/6401/5054/7040/7124/7498/3949/153/3791/356/6010	38
DOID:1176	bronchial disease	29/275	153/8007	2.7375e-14	1.68276e-13	3.3562e-14	5743/3565/154/7422/596/847/598/3627/3315/3383/3458/3586/3553/3659/3576/581/4312/4313/4318/4846/5328/5054/6647/7040/7056/7124/7498/6590/3791	29
DOID:3565	meningioma	21/275	77/8007	5.95844e-14	3.6201e-13	7.22014e-14	5743/7157/7422/596/332/841/857/595/1026/1029/2152/1956/2064/4313/4318/5328/5444/11186/5925/2194/1803	21
DOID:76	stomach disease	21/275	77/8007	5.95844e-14	3.6201e-13	7.22014e-14	5742/5743/4353/7157/240/1281/3586/3552/3553/3558/3576/4318/5925/6401/6647/7040/7124/7498/6590/356/27035	21
DOID:341	peripheral vascular disease	19/275	61/8007	6.64789e-14	4.01564e-13	8.00902e-14	7157/7422/207/1026/1029/3091/3383/3586/3569/581/1869/4314/4846/6401/5054/7412/7299/1432/2475	19
DOID:2876	laryngeal squamous cell carcinoma	12/275	19/8007	8.64622e-14	5.1927e-13	1.03566e-13	5743/596/332/857/1026/1029/4609/5925/891/572/5111/896	12
DOID:4045	muscle cancer	24/275	107/8007	1.04433e-13	6.23614e-13	1.24377e-13	3565/8648/7157/7422/596/332/207/598/595/1026/1029/3481/1956/6373/4313/4609/5925/7040/7153/5599/9332/4170/4193/4233	24
DOID:2916	hypersensitivity reaction type IV disease	22/275	88/8007	1.05848e-13	6.28475e-13	1.25347e-13	5743/5468/7422/1277/1401/3627/6347/1026/1281/3458/3553/3569/6696/4792/5444/6401/6772/7040/7124/3500/7076/3791	22
DOID:5157	benign pleural mesothelioma	16/275	41/8007	1.15858e-13	6.84019e-13	1.36425e-13	7157/7422/332/207/1026/1029/2944/5594/1956/6696/5595/4318/11186/5970/3791/4170	16
DOID:345	uterine disease	17/275	48/8007	1.28405e-13	7.53835e-13	1.50349e-13	5743/847/6347/595/1026/1029/2152/3586/3569/3576/4313/4318/4846/5925/6401/7124/4193	17
DOID:2645	benign mesothelioma	18/275	57/8007	2.36719e-13	1.38197e-12	2.75627e-13	7157/7422/332/836/207/1026/1029/2944/5594/1956/6696/5595/4318/11186/5970/3791/4170/331	18
DOID:13810	familial hypercholesterolemia	13/275	25/8007	2.51397e-13	1.4595e-12	2.91091e-13	4353/3586/3576/1956/4318/5444/6647/7124/9370/4547/3949/338/2155	13
DOID:0050624	gastrointestinal system benign neoplasm	17/275	50/8007	2.80006e-13	1.59978e-12	3.19069e-13	367/5743/3565/890/7157/7422/596/332/598/1401/595/1029/3091/3569/2064/4193/6288	17
DOID:0060095	uterine benign neoplasm	16/275	43/8007	2.80152e-13	1.59978e-12	3.19069e-13	367/2099/2100/7157/7422/596/1277/595/1029/3553/3569/4313/7040/5241/1588/5111	16
DOID:13223	uterine fibroid	16/275	43/8007	2.80152e-13	1.59978e-12	3.19069e-13	367/2099/2100/7157/7422/596/1277/595/1029/3553/3569/4313/7040/5241/1588/5111	16
DOID:12930	dilated cardiomyopathy	22/275	93/8007	3.62041e-13	2.05616e-12	4.10092e-13	6331/2099/2100/154/4306/7157/1401/959/3458/3553/3569/2064/4312/4314/4318/5054/7040/7124/9370/153/1129/152	22
DOID:11335	sarcoidosis	21/275	84/8007	3.92853e-13	2.21909e-12	4.42588e-13	5743/5468/7422/1277/1401/3627/6347/1026/1281/3458/3553/3569/6696/4792/5444/6401/6772/7040/7124/3500/3791	21
DOID:870	neuropathy	31/275	194/8007	4.31803e-13	2.42599e-12	4.83854e-13	2099/2100/6531/7157/7422/596/836/3627/2065/3315/3586/3553/3569/2064/4313/4318/4846/142/5327/5970/6401/7040/7056/7124/3949/351/356/5580/2908/1813/779	31
DOID:1428	endocrine pancreas disease	18/275	59/8007	4.64258e-13	2.59438e-12	5.17439e-13	5468/4306/1401/6347/959/3383/3553/3569/3643/6517/6401/5054/6772/7124/7412/9370/338/6833	18
DOID:288	endometriosis of uterus	10/275	13/8007	5.07798e-13	2.8226e-12	5.62956e-13	847/6347/595/1026/1029/3569/3576/4313/5925/4193	10
DOID:783	end stage renal failure	15/275	38/8007	5.68842e-13	3.14519e-12	6.27295e-13	3565/2099/148/6347/2944/3586/3552/3553/3569/4846/6401/5054/338/147/146	15
DOID:0060086	female reproductive organ benign neoplasm	16/275	45/8007	6.42084e-13	3.51297e-12	7.00649e-13	367/2099/2100/7157/7422/596/1277/595/1029/3553/3569/4313/7040/5241/1588/5111	16
DOID:0080008	ischemic bone disease	16/275	45/8007	6.42084e-13	3.51297e-12	7.00649e-13	5468/6531/6532/7157/7422/3091/3486/4314/4846/5444/5054/7124/6720/9370/3356/1813	16
DOID:13241	Behcet's disease	21/275	86/8007	6.4892e-13	3.53188e-12	7.0442e-13	3565/7422/6347/2944/2950/3162/3383/3458/3586/3552/3553/3558/3659/3576/1543/4313/4318/4792/4846/7056/7124	21
DOID:7998	hyperthyroidism	22/275	96/8007	7.27338e-13	3.93818e-12	7.85454e-13	5468/2100/154/7157/596/841/3627/3383/3458/3586/3552/3553/3569/3659/3576/581/6517/5465/6401/5054/7124/356	22
DOID:1307	dementia	27/275	150/8007	8.2537e-13	4.44443e-12	8.86423e-13	4843/5468/2099/2100/6531/6532/7157/7422/596/1401/3553/3569/3576/2002/581/1869/6696/4314/4846/5444/7040/7124/6720/7076/351/4128/1889	27
DOID:0060005	autoimmune disease of endocrine system	21/275	87/8007	8.29343e-13	4.44443e-12	8.86423e-13	5743/5468/2100/154/7157/596/841/3627/6347/3383/3586/3552/3553/3569/3659/3576/581/5465/6401/7124/356	21
DOID:1067	open-angle glaucoma	18/275	61/8007	8.84323e-13	4.71488e-12	9.40365e-13	2099/2100/154/7157/857/1026/2944/3309/3552/3553/1545/4846/5444/5054/7124/3949/153/356	18
DOID:0060058	lymphoma	21/275	88/8007	1.05611e-12	5.60221e-12	1.11734e-12	5743/3565/3725/596/332/836/598/595/1029/3383/3586/3553/3569/3576/581/4313/4318/4609/6401/4193/4233	21
DOID:0060122	integumentary system cancer	22/275	98/8007	1.1403e-12	5.98799e-12	1.19428e-12	5743/7157/836/207/598/650/595/1026/1029/1147/3569/3576/1956/581/4312/4313/4318/4609/4170/4233/5111/1432	22
DOID:4159	skin cancer	22/275	98/8007	1.1403e-12	5.98799e-12	1.19428e-12	5743/7157/836/207/598/650/595/1026/1029/1147/3569/3576/1956/581/4312/4313/4318/4609/4170/4233/5111/1432	22
DOID:10124	corneal disease	18/275	62/8007	1.20807e-12	6.31219e-12	1.25894e-12	5743/7157/7422/332/847/1026/2152/2944/3383/3553/1543/6649/4313/4318/6647/7040/6590/125	18
DOID:9352	type 2 diabetes mellitus	32/275	215/8007	1.31503e-12	6.83683e-12	1.36358e-12	367/3565/4353/841/6347/1029/3309/3315/3383/3458/3486/3586/3552/3553/3569/3576/31/6517/6649/4313/4318/5327/5465/6401/5054/6647/6530/9370/4547/2194/338/356	32
DOID:0050622	reproductive organ benign neoplasm	16/275	47/8007	1.40299e-12	7.25803e-12	1.44758e-12	367/2099/2100/7157/7422/596/1277/595/1029/3553/3569/4313/7040/5241/1588/5111	16
DOID:5295	intestinal disease	27/275	157/8007	2.56683e-12	1.32135e-11	2.63537e-12	5742/5743/6331/3565/890/6532/7157/7422/3627/1029/3383/3458/3481/3586/3553/3569/5594/3576/4312/4314/8856/5970/6401/7412/760/1432/4772	27
DOID:2841	asthma	25/275	134/8007	2.63361e-12	1.34908e-11	2.69068e-12	5743/3565/154/596/847/598/3627/3315/3383/3458/3586/3553/3659/3576/581/4313/4318/4846/5328/5054/6647/7040/7498/6590/3791	25
DOID:1319	brain cancer	15/275	42/8007	3.2053e-12	1.63392e-11	3.25879e-12	5743/43/7157/332/847/1029/3481/4318/4609/11186/5925/3791/4233/351/4133	15
DOID:5158	pleural cancer	14/275	36/8007	4.41187e-12	2.22725e-11	4.44216e-12	7157/7422/332/1026/1029/5594/1956/6696/5595/4318/11186/5970/3791/4170	14
DOID:7474	malignant pleural mesothelioma	14/275	36/8007	4.41187e-12	2.22725e-11	4.44216e-12	7157/7422/332/1026/1029/5594/1956/6696/5595/4318/11186/5970/3791/4170	14
DOID:974	upper respiratory tract disease	24/275	126/8007	4.61386e-12	2.31802e-11	4.6232e-12	4843/3565/3725/7422/596/836/959/3162/3383/3569/3576/1956/4846/5578/5970/5054/7040/7124/7412/9370/356/27035/1803/6257	24
DOID:8567	Hodgkin's lymphoma	16/275	51/8007	5.9156e-12	2.9578e-11	5.89921e-12	5743/3565/3725/596/332/836/1029/3383/3586/3553/3576/581/4313/4318/6401/4193	16
DOID:4138	bile duct disease	20/275	86/8007	6.25335e-12	3.11179e-11	6.20633e-12	5468/2099/2100/7157/7422/1029/2152/3091/3162/3383/3569/5594/6696/8856/9970/6401/54658/7076/2539/1244	20
DOID:9741	biliary tract disease	20/275	87/8007	7.87246e-12	3.89892e-11	7.77624e-12	5468/2099/2100/7157/7422/1029/2152/3091/3162/3383/3569/5594/6696/8856/9970/6401/54658/7076/2539/1244	20
DOID:381	arthropathy	21/275	97/8007	8.01956e-12	3.95304e-11	7.88418e-12	4843/7422/650/1401/6347/3309/3458/3586/3553/3558/3569/3576/1543/4312/4313/4314/4318/4792/7124/6590/6288	21
DOID:3627	aortic aneurysm	17/275	60/8007	8.07655e-12	3.96244e-11	7.90292e-12	5743/5468/1401/3315/3586/3569/3576/4313/4318/4846/5327/5579/9370/338/7076/5580/2335	17
DOID:0060041	autism spectrum disorder	29/275	190/8007	8.44179e-12	4.1031e-11	8.18347e-12	367/4843/5743/154/6532/7157/7422/596/836/207/1509/2697/2944/1950/5444/5579/5728/7040/2891/18/9370/1814/3791/4233/4128/2554/3356/1812/3358	29
DOID:12849	autistic disorder	29/275	190/8007	8.44179e-12	4.1031e-11	8.18347e-12	367/4843/5743/154/6532/7157/7422/596/836/207/1509/2697/2944/1950/5444/5579/5728/7040/2891/18/9370/1814/3791/4233/4128/2554/3356/1812/3358	29
DOID:0080005	bone remodeling disease	25/275	141/8007	8.60269e-12	4.16195e-11	8.30084e-12	367/2099/2100/1277/650/6347/595/3383/3552/3553/3569/5594/1543/1545/1576/5595/8856/5444/5894/860/6772/7040/7124/1588/125	25
DOID:2355	anemia	33/275	244/8007	8.65378e-12	4.16737e-11	8.31166e-12	4843/4353/7157/7422/1026/2152/2944/2950/3383/3458/3486/3586/3553/3569/3576/1543/1576/581/1728/142/5328/5444/7040/7056/7124/7412/54658/356/760/2539/3320/1111/2475	33
DOID:520	aortic disease	17/275	61/8007	1.08554e-11	5.2036e-11	1.03784e-11	5743/5468/1401/3315/3586/3569/3576/4313/4318/4846/5327/5579/9370/338/7076/5580/2335	17
DOID:0060031	autoimmune disease of gastrointestinal tract	22/275	109/8007	1.11201e-11	5.30615e-11	1.05829e-11	4843/596/3091/3383/3458/3586/3553/3558/3569/3659/3576/142/5444/6401/6647/6772/7040/7124/2936/4985/356/1803	22
DOID:2921	glomerulonephritis	19/275	79/8007	1.13292e-11	5.38137e-11	1.07329e-11	3565/4353/231/6347/1281/3383/3458/3486/3586/3569/4313/4318/5578/5579/5970/6401/5054/7040/7412	19
DOID:1247	blood coagulation disease	28/275	180/8007	1.23713e-11	5.84978e-11	1.16671e-11	367/3565/54205/7422/836/847/598/1401/3627/959/2152/3162/3383/3458/3553/3569/3576/4318/4846/5327/5328/5444/5054/7040/7056/4233/356/2155	28
DOID:13375	temporal arteritis	13/275	32/8007	1.35283e-11	6.33948e-11	1.26438e-11	4843/3565/2100/7422/3091/3383/3458/3586/3569/4313/4318/4846/6401	13
DOID:525	central nervous system vasculitis	13/275	32/8007	1.35283e-11	6.33948e-11	1.26438e-11	4843/3565/2100/7422/3091/3383/3458/3586/3569/4313/4318/4846/6401	13
DOID:12361	Graves' disease	19/275	80/8007	1.44047e-11	6.72006e-11	1.34029e-11	5468/2100/154/7157/596/841/3627/3383/3586/3552/3553/3569/3659/3576/581/5465/6401/7124/356	19
DOID:13580	cholestasis	17/275	62/8007	1.44999e-11	6.7344e-11	1.34315e-11	2099/2100/7157/7422/2152/3091/3162/3383/3569/5594/6696/8856/9970/6401/7076/2539/1244	17
DOID:2018	hyperinsulinism	16/275	54/8007	1.58496e-11	7.32868e-11	1.46168e-11	5468/1401/6347/959/3383/3569/3643/6517/6401/5054/6772/7124/7412/9370/338/6833	16
DOID:3087	gingivitis	11/275	21/8007	1.67305e-11	7.66816e-11	1.52938e-11	4843/4353/7422/3586/3552/3553/3569/4318/4953/4069/4772	11
DOID:3702	cervical adenocarcinoma	11/275	21/8007	1.67305e-11	7.66816e-11	1.52938e-11	5743/7157/207/1029/5594/1956/5595/5728/6590/3791/4233	11
DOID:10608	celiac disease	20/275	91/8007	1.9132e-11	8.73054e-11	1.74127e-11	596/3091/3383/3458/3586/3553/3558/3569/3659/3576/142/5444/6401/6647/6772/7040/7124/2936/356/1803	20
DOID:1483	gingival disease	13/275	33/8007	2.1643e-11	9.83343e-11	1.96124e-11	4843/4353/7422/3586/3552/3553/3569/4314/4318/4953/7040/4069/4772	13
DOID:1724	duodenal ulcer	12/275	27/8007	2.33129e-11	1.05463e-10	2.10342e-11	4353/7157/3553/3558/3569/3576/4314/4318/5328/6401/7040/7124	12
DOID:0060040	pervasive developmental disorder	29/275	201/8007	3.50813e-11	1.58017e-10	3.15159e-11	367/4843/5743/154/6532/7157/7422/596/836/207/1509/2697/2944/1950/5444/5579/5728/7040/2891/18/9370/1814/3791/4233/4128/2554/3356/1812/3358	29
DOID:2213	hemorrhagic disease	25/275	152/8007	4.76846e-11	2.13864e-10	4.26544e-11	367/3565/54205/7422/836/847/598/1401/3627/959/3162/3383/3458/3553/3569/3576/4318/4846/5328/5444/5054/7040/7056/4233/356	25
DOID:10316	pneumoconiosis	13/275	35/8007	5.24089e-11	2.34025e-10	4.66754e-11	4843/841/847/2950/3458/3586/3552/3553/2064/6649/4314/7124/356	13
DOID:2462	retinal vascular disease	16/275	58/8007	5.30756e-11	2.34025e-10	4.66754e-11	7422/6347/3091/3383/3458/3486/3569/3576/4312/4313/4318/6401/5054/6647/7124/7412	16
DOID:3829	pituitary adenoma	16/275	58/8007	5.30756e-11	2.34025e-10	4.66754e-11	7422/196/596/595/1026/1029/3569/2064/581/4318/5925/3791/5111/356/1813/4133	16
DOID:8947	diabetic retinopathy	16/275	58/8007	5.30756e-11	2.34025e-10	4.66754e-11	7422/6347/3091/3383/3458/3486/3569/3576/4312/4313/4318/6401/5054/6647/7124/7412	16
DOID:11476	osteoporosis	20/275	96/8007	5.42179e-11	2.38057e-10	4.74796e-11	367/2099/2100/1277/650/3383/3552/3553/3569/5594/1543/1545/1576/5595/5444/860/6772/7040/7124/1588	20
DOID:1070	primary open angle glaucoma	15/275	50/8007	5.70748e-11	2.48513e-10	4.95649e-11	2100/7157/857/1026/2944/3309/3552/3553/1545/4846/5444/5054/7124/3949/356	15
DOID:3376	bone osteosarcoma	15/275	50/8007	5.70748e-11	2.48513e-10	4.95649e-11	3725/596/836/841/650/857/1026/1029/3576/581/4318/8856/5925/860/4233	15
DOID:4914	esophagus adenocarcinoma	11/275	23/8007	6.03147e-11	2.61531e-10	5.21612e-11	5743/5468/890/332/3309/3486/4313/4609/7040/4233/79400	11
DOID:0080011	bone resorption disease	20/275	97/8007	6.62174e-11	2.85939e-10	5.70294e-11	367/2099/2100/1277/650/3383/3552/3553/3569/5594/1543/1545/1576/5595/5444/860/6772/7040/7124/1588	20
DOID:6432	pulmonary hypertension	18/275	77/8007	6.71148e-11	2.88621e-10	5.75643e-11	4843/5743/3725/5468/6532/7422/650/857/2152/3091/3162/3569/4846/6647/7124/5111/4128/3356	18
DOID:3969	papillary thyroid carcinoma	21/275	108/8007	7.02847e-11	3.01015e-10	6.00361e-11	5743/6256/5468/7157/7422/6347/595/1026/1029/2944/3091/1956/2064/6696/5728/5925/860/5599/4233/331/2335	21
DOID:3737	verrucous carcinoma	8/275	10/8007	7.42763e-11	3.16811e-10	6.31867e-11	7157/596/595/1026/1029/1956/5925/4193	8
DOID:0060037	developmental disorder of mental health	40/275	373/8007	7.94089e-11	3.37327e-10	6.72784e-11	367/4843/5743/4129/154/6531/6532/7157/7422/596/836/207/1509/2697/2944/3458/3558/3569/1950/5444/5579/5728/7040/2891/6530/18/9370/1814/3359/3791/4233/4128/150/2908/1803/2554/3356/1812/3358/1813	40
DOID:4007	bladder carcinoma	16/275	60/8007	9.334e-11	3.949e-10	7.87612e-11	5743/7157/7422/857/595/1029/2950/3576/2064/581/4609/5465/5467/7040/4193/356	16
DOID:0060180	colitis	17/275	69/8007	9.41297e-11	3.95042e-10	7.87896e-11	3565/890/6532/3627/1029/3383/3458/3481/3553/3569/3576/4312/4314/8856/5970/760/4772	17
DOID:8577	ulcerative colitis	17/275	69/8007	9.41297e-11	3.95042e-10	7.87896e-11	3565/890/6532/3627/1029/3383/3458/3481/3553/3569/3576/4312/4314/8856/5970/760/4772	17
DOID:0060089	endocrine organ benign neoplasm	20/275	99/8007	9.7996e-11	4.09623e-10	8.16977e-11	7422/196/596/857/595/1026/1029/3569/2064/581/4318/5327/5925/9370/3791/5111/356/896/1813/4133	20
DOID:3068	glioblastoma multiforme	17/275	70/8007	1.20528e-10	5.01802e-10	1.00082e-10	5743/596/332/836/6347/595/1026/1029/3481/3576/581/4318/4609/5328/5925/4193/351	17
DOID:8618	oral cavity cancer	16/275	61/8007	1.22668e-10	5.08682e-10	1.01455e-10	5743/890/7157/596/332/1509/595/1029/5594/1956/5595/4313/4318/5970/4193/5111	16
DOID:3407	carotid artery disease	10/275	19/8007	1.36538e-10	5.63961e-10	1.1248e-10	1401/3091/3569/6696/4313/4318/4846/5444/7076/356	10
DOID:75	lymphatic system disease	20/275	101/8007	1.43565e-10	5.90653e-10	1.17803e-10	4843/3565/4306/7157/7422/836/841/1401/6347/959/3586/3553/4312/4314/4318/7040/7124/9332/3791/4233	20
DOID:8029	sporadic breast cancer	12/275	31/8007	1.67318e-10	6.85676e-10	1.36755e-10	2100/7157/7422/857/1029/2950/3091/3458/4953/5728/1588/3791	12
DOID:687	hepatoblastoma	11/275	25/8007	1.87002e-10	7.63348e-10	1.52247e-10	2932/4353/7157/207/595/3162/3481/11186/4193/5111/356	11
DOID:13378	Kawasaki disease	15/275	54/8007	1.9389e-10	7.88387e-10	1.57241e-10	4843/3565/7422/836/1401/6347/959/3586/3553/4312/4314/4318/7040/7124/3791	15
DOID:2871	endometrial carcinoma	18/275	82/8007	2.057e-10	8.33167e-10	1.66172e-10	367/5743/596/332/3627/595/1029/3552/3569/4313/4318/4609/8856/5925/4193/4233/5111/896	18
DOID:3748	esophagus squamous cell carcinoma	16/275	63/8007	2.08305e-10	8.40458e-10	1.67626e-10	5743/6256/7157/596/857/595/1026/1029/3586/3576/581/4314/6401/5054/891/4193	16
DOID:2723	dermatitis	27/275	189/8007	2.19105e-10	8.80634e-10	1.75639e-10	3565/5468/6532/7422/836/3627/1026/2944/2950/3162/3315/3383/3458/3586/3552/3553/3569/1544/4318/5328/5465/5970/6401/7124/7076/3356/2171	27
DOID:2797	idiopathic interstitial pneumonia	12/275	32/8007	2.59592e-10	1.03936e-09	2.07297e-10	3565/6347/595/1029/3458/3486/3552/3569/6649/4312/4313/5328	12
DOID:3962	follicular thyroid carcinoma	15/275	56/8007	3.42276e-10	1.36518e-09	2.7228e-10	5468/2099/2100/7422/207/595/1029/1950/4313/4318/5328/7040/7076/3791/2475	15
DOID:4029	gastritis	16/275	65/8007	3.46296e-10	1.37597e-09	2.74431e-10	5742/5743/7157/240/3586/3552/3553/3558/3576/4318/5925/6401/7040/7124/6590/356	16
DOID:4866	salivary gland adenoid cystic carcinoma	13/275	40/8007	3.66079e-10	1.44906e-09	2.8901e-10	7157/596/332/1509/595/1029/5594/5595/4313/4318/5970/4193/5111	13
DOID:10456	tonsillitis	7/275	8/8007	4.06369e-10	1.60247e-09	3.19607e-10	4843/836/3383/4846/356/1803/6257	7
DOID:2377	multiple sclerosis	25/275	169/8007	4.98678e-10	1.95909e-09	3.90733e-10	4353/847/598/1401/3627/6347/959/2944/3162/3383/3458/3586/3553/3558/3569/3659/3576/4314/4318/5327/5970/5054/331/356/2908	25
DOID:612	primary immunodeficiency disease	27/275	196/8007	5.07249e-10	1.9853e-09	3.9596e-10	3565/6532/7157/841/650/857/959/3458/3586/3558/3569/4609/653361/5328/6772/7124/54658/9332/3791/4233/331/356/27035/1555/1666/1803/79400	27
DOID:7693	abdominal aortic aneurysm	14/275	49/8007	5.24975e-10	2.0394e-09	4.06751e-10	5743/5468/1401/3586/3569/3576/4313/4318/4846/5327/9370/338/7076/5580	14
DOID:9952	acute lymphocytic leukemia	14/275	49/8007	5.24975e-10	2.0394e-09	4.06751e-10	596/841/6347/1026/1029/3586/3576/9429/862/5925/5054/7040/7153/4193	14
DOID:11729	Lyme disease	9/275	16/8007	5.41212e-10	2.08696e-09	4.16236e-10	5742/5743/6347/3553/3569/6373/4312/4318/7040	9
DOID:12205	dengue disease	9/275	16/8007	5.41212e-10	2.08696e-09	4.16236e-10	7422/6347/2152/3383/3586/7040/7124/7412/3791	9
DOID:8857	lupus erythematosus	18/275	87/8007	5.79209e-10	2.22527e-09	4.43821e-10	3565/3725/596/836/847/6347/3383/3458/3586/3553/3558/3569/4318/6401/6647/3500/3791/356	18
DOID:1602	lymphadenitis	15/275	58/8007	5.88946e-10	2.23799e-09	4.46359e-10	4843/3565/7422/836/1401/6347/959/3586/3553/4312/4314/4318/7040/7124/3791	15
DOID:8850	salivary gland cancer	15/275	58/8007	5.88946e-10	2.23799e-09	4.46359e-10	890/7157/596/332/1509/595/1029/5594/1956/5595/4313/4318/5970/4193/5111	15
DOID:9942	lymph node disease	15/275	58/8007	5.88946e-10	2.23799e-09	4.46359e-10	4843/3565/7422/836/1401/6347/959/3586/3553/4312/4314/4318/7040/7124/3791	15
DOID:4251	conjunctival disease	12/275	34/8007	5.92792e-10	2.24445e-09	4.47646e-10	5743/7157/7422/332/2152/2944/3383/3569/3576/1543/6772/7040	12
DOID:3498	pancreatic ductal adenocarcinoma	19/275	98/8007	6.16281e-10	2.32496e-09	4.63704e-10	7157/207/857/959/2152/3091/3569/1545/1956/2064/4318/1728/5327/5328/7040/7124/2194/4233/331	19
DOID:48	male reproductive system disease	22/275	133/8007	6.51794e-10	2.45009e-09	4.8866e-10	367/2099/8648/7157/7422/596/6347/2944/3315/3586/3553/3569/3576/1543/1956/55/4824/7124/8644/1588/338/356	22
DOID:4481	allergic rhinitis	19/275	99/8007	7.39374e-10	2.76934e-09	5.52334e-10	4843/3565/3725/7422/596/959/3162/3383/3569/3576/1956/5578/5970/5054/7040/7124/7412/9370/27035	19
DOID:1205	hypersensitivity reaction type I disease	21/275	122/8007	7.59518e-10	2.83463e-09	5.65356e-10	3565/2099/2932/148/6531/7157/196/6347/3458/3586/1545/9429/6647/7040/7124/351/2908/1803/147/146/125	21
DOID:12894	Sjogren's syndrome	16/275	69/8007	9.03217e-10	3.35894e-09	6.69927e-10	1128/3725/841/3383/3458/3586/3553/1950/4792/4846/6772/7124/7498/9370/356/1131	16
DOID:11714	gestational diabetes	15/275	60/8007	9.89758e-10	3.66772e-09	7.31512e-10	5468/1401/6347/3486/3553/3569/6517/5465/7040/7124/9370/3356/347/6288/6833	15
DOID:12603	acute leukemia	20/275	112/8007	9.96842e-10	3.68092e-09	7.34145e-10	3565/4353/7422/596/332/2697/2944/2950/3586/3558/3569/3576/1543/1956/862/4609/4363/1385/1555/10499	20
DOID:0050589	inflammatory bowel disease	18/275	90/8007	1.03963e-09	3.82539e-09	7.62959e-10	3565/890/6532/3627/1029/3383/3458/3481/3586/3553/3569/3576/4312/4314/8856/5970/760/4772	18
DOID:2163	nasal cavity disease	19/275	101/8007	1.05673e-09	3.84697e-09	7.67262e-10	4843/3565/3725/7422/596/959/3162/3383/3569/3576/1956/5578/5970/5054/7040/7124/7412/9370/27035	19
DOID:2825	nose disease	19/275	101/8007	1.05673e-09	3.84697e-09	7.67262e-10	4843/3565/3725/7422/596/959/3162/3383/3569/3576/1956/5578/5970/5054/7040/7124/7412/9370/27035	19
DOID:4483	rhinitis	19/275	101/8007	1.05673e-09	3.84697e-09	7.67262e-10	4843/3565/3725/7422/596/959/3162/3383/3569/3576/1956/5578/5970/5054/7040/7124/7412/9370/27035	19
DOID:3213	demyelinating disease	25/275	175/8007	1.06022e-09	3.84697e-09	7.67262e-10	4353/847/598/1401/3627/6347/959/2944/3162/3383/3458/3586/3553/3558/3569/3659/3576/4314/4318/5327/5970/5054/331/356/2908	25
DOID:3324	mood disorder	26/275	189/8007	1.11546e-09	4.03342e-09	8.04449e-10	367/2099/2932/6531/6532/596/207/1401/6347/3309/3553/3576/4318/5467/7124/6530/1385/1814/4128/2908/1129/3356/1812/3358/239/2171	26
DOID:13189	gout	11/275	29/8007	1.28384e-09	4.62626e-09	9.22688e-10	5743/3565/650/3553/3569/9429/4314/7040/7124/5321/4128	11
DOID:635	acquired immunodeficiency syndrome	16/275	71/8007	1.42065e-09	5.10164e-09	1.0175e-09	3565/2932/7157/596/3627/3458/3586/1576/581/6373/6590/5599/5111/356/2539/2908	16
DOID:5223	infertility	27/275	206/8007	1.57156e-09	5.62425e-09	1.12173e-09	367/3565/2099/2100/7157/7422/196/332/6347/2944/2950/3315/3481/3586/3552/3553/3569/1543/4313/4318/4846/5054/7040/7124/5241/1588/338	27
DOID:255	hemangioma	12/275	37/8007	1.82598e-09	6.51244e-09	1.29888e-09	367/7157/7422/595/3091/3481/3553/3569/4314/4318/6530/3791	12
DOID:4248	coronary stenosis	9/275	18/8007	2.16472e-09	7.69432e-09	1.5346e-09	1401/6347/3383/3569/6696/4313/4314/5054/7124	9
DOID:3744	cervical squamous cell carcinoma	16/275	73/8007	2.19874e-09	7.78877e-09	1.55344e-09	596/332/595/1026/1029/3569/581/4312/4313/4314/4318/4609/5894/11186/5925/4233	16
DOID:332	amyotrophic lateral sclerosis	23/275	155/8007	2.39427e-09	8.45275e-09	1.68587e-09	367/5743/2932/7422/836/6347/2950/3481/3486/4313/4318/142/5444/6647/7124/2891/7076/3791/4233/351/2554/1432/779	23
DOID:161	keratosis	13/275	46/8007	2.57273e-09	9.05219e-09	1.80542e-09	7157/7422/596/595/1026/1029/2697/2944/5594/1950/1956/5595/5465	13
DOID:3312	bipolar disorder	23/275	156/8007	2.72275e-09	9.54791e-09	1.90429e-09	2099/2932/6531/6532/596/207/1401/6347/3309/3553/5467/7124/6530/1385/1814/4128/2908/1129/3356/1812/3358/239/2171	23
DOID:11394	adult respiratory distress syndrome	11/275	31/8007	2.95511e-09	1.0328e-08	2.05989e-09	7422/2152/3586/3553/3569/3576/1950/4846/5054/7040/356	11
DOID:1380	endometrial cancer	18/275	97/8007	3.7086e-09	1.29183e-08	2.5765e-09	367/5743/596/332/3627/595/1029/3552/3569/4313/4318/4609/8856/5925/4193/4233/5111/896	18
DOID:14069	cerebral malaria	10/275	25/8007	4.02257e-09	1.39654e-08	2.78534e-09	4843/3565/7422/3627/3162/3383/3553/4312/4846/7124	10
DOID:1564	fungal infectious disease	16/275	76/8007	4.11618e-09	1.42431e-08	2.84073e-09	4843/3565/3627/1029/3458/3586/3552/3553/3569/4318/5728/6772/7040/6590/1432/2171	16
DOID:12206	dengue hemorrhagic fever	8/275	14/8007	4.39462e-09	1.50411e-08	2.99988e-09	7422/6347/3383/3586/7040/7124/7412/3791	8
DOID:13001	carotid stenosis	8/275	14/8007	4.39462e-09	1.50411e-08	2.99988e-09	1401/3091/3569/6696/4313/4318/7076/356	8
DOID:2945	severe acute respiratory syndrome	8/275	14/8007	4.39462e-09	1.50411e-08	2.99988e-09	598/3627/3458/3586/3558/3569/5925/896	8
DOID:363	uterine cancer	18/275	98/8007	4.40438e-09	1.50411e-08	2.99988e-09	367/5743/596/332/3627/595/1029/3552/3569/4313/4318/4609/8856/5925/4193/4233/5111/896	18
DOID:0050904	salivary gland carcinoma	14/275	57/8007	4.67169e-09	1.5902e-08	3.17159e-09	7157/596/332/1509/595/1029/5594/1956/5595/4313/4318/5970/4193/5111	14
DOID:0050339	commensal bacterial infectious disease	12/275	40/8007	5.02133e-09	1.70367e-08	3.39789e-09	6347/2152/3383/3586/3569/5594/3576/5595/5970/6772/7076/6288	12
DOID:12306	vitiligo	15/275	67/8007	5.18065e-09	1.75203e-08	3.49435e-09	5743/3565/2099/43/7157/847/2944/2950/3458/3586/3569/4780/6649/7124/7299	15
DOID:3451	skin carcinoma	14/275	58/8007	5.97074e-09	2.01272e-08	4.01429e-09	5743/7157/207/598/650/595/1026/1029/3569/3576/4312/4313/4318/4170	14
DOID:2742	auditory system disease	18/275	100/8007	6.17016e-09	2.07325e-08	4.13502e-09	4843/7422/1277/650/1026/1029/3458/3586/3553/3569/3576/1950/1956/4313/4318/4846/5054/7040	18
DOID:1094	attention deficit hyperactivity disorder	11/275	33/8007	6.35278e-09	2.12098e-08	4.2302e-09	4129/6531/6532/6530/1814/4128/150/3356/1812/3358/1813	11
DOID:3355	fibrosarcoma	11/275	33/8007	6.35278e-09	2.12098e-08	4.2302e-09	5743/7157/598/1277/2152/3569/4314/4318/7124/3791/347	11
DOID:10883	herpangina	9/275	20/8007	7.03798e-09	2.32009e-08	4.62733e-09	6531/6532/596/1029/3576/3359/4193/351/3320	9
DOID:3302	chordoma	9/275	20/8007	7.03798e-09	2.32009e-08	4.62733e-09	367/7422/1029/3091/4312/4318/5328/4363/4233	9
DOID:3303	notochordal cancer	9/275	20/8007	7.03798e-09	2.32009e-08	4.62733e-09	367/7422/1029/3091/4312/4318/5328/4363/4233	9
DOID:799	varicose veins	9/275	20/8007	7.03798e-09	2.32009e-08	4.62733e-09	7157/7422/2944/3162/4314/4318/142/7124/356	9
DOID:3247	rhabdomyosarcoma	16/275	79/8007	7.46951e-09	2.4546e-08	4.8956e-09	3565/8648/7157/7422/207/598/1026/1029/3481/1956/6373/7040/5599/4170/4193/4233	16
DOID:2030	anxiety disorder	15/275	69/8007	7.98354e-09	2.6153e-08	5.2161e-09	367/4129/2099/6531/6532/3586/3558/3569/3576/5241/6530/3359/4128/3356/1813	15
DOID:1036	chronic leukemia	27/275	223/8007	9.11991e-09	2.97822e-08	5.93994e-09	367/4353/7157/7422/596/332/207/598/595/959/1029/3552/3569/581/6696/5595/4609/5579/5728/11186/5970/6772/7124/5599/9370/3791/4170	27
DOID:0050136	systemic mycosis	12/275	42/8007	9.34572e-09	3.03301e-08	6.04921e-09	4843/3565/3627/3458/3586/3552/3553/3569/6772/7040/6590/1432	12
DOID:11077	brucellosis	12/275	42/8007	9.34572e-09	3.03301e-08	6.04921e-09	3565/7422/1401/3458/3586/3553/3569/5054/7040/7056/7124/6288	12
DOID:10159	osteonecrosis	10/275	27/8007	9.76715e-09	3.15996e-08	6.30241e-09	5468/7157/7422/3091/3486/4846/5444/5054/6720/9370	10
DOID:8970	subacute sclerosing panencephalitis	6/275	7/8007	1.05814e-08	3.41281e-08	6.80672e-09	3565/3458/3586/3558/3569/4318	6
DOID:9500	leukocyte disease	17/275	92/8007	1.0906e-08	3.50567e-08	6.99192e-09	7422/596/332/598/3458/3586/3558/3569/3576/1869/4313/4609/7040/7124/54658/1131/1244	17
DOID:9074	systemic lupus erythematosus	16/275	81/8007	1.09364e-08	3.50567e-08	6.99192e-09	3565/3725/596/836/847/6347/3383/3458/3586/3553/3558/4318/6401/6647/3791/356	16
DOID:3326	purpura	15/275	71/8007	1.21095e-08	3.86985e-08	7.71827e-09	3565/7422/836/847/959/3162/3458/3553/3569/4318/4846/5444/7040/4233/356	15
DOID:1272	telangiectasis	11/275	35/8007	1.28809e-08	4.09136e-08	8.16006e-09	7157/7422/207/1026/1029/3091/581/1869/7299/1432/2475	11
DOID:13207	proliferative diabetic retinopathy	11/275	35/8007	1.28809e-08	4.09136e-08	8.16006e-09	7422/6347/3091/3383/3569/4313/4318/6401/6647/7124/7412	11
DOID:8670	eating disorder	10/275	28/8007	1.47369e-08	4.66667e-08	9.30749e-09	6532/3458/3569/6530/9370/4128/2908/1803/3356/3358	10
DOID:4043	skeletal muscle cancer	16/275	83/8007	1.58215e-08	4.97994e-08	9.9323e-09	3565/8648/7157/7422/207/598/1026/1029/3481/1956/6373/7040/5599/4170/4193/4233	16
DOID:440	neuromuscular disease	16/275	83/8007	1.58215e-08	4.97994e-08	9.9323e-09	2099/2100/3627/2065/3315/3586/3569/2064/4313/4318/6401/7040/7124/2908/1813/779	16
DOID:7166	thyroiditis	13/275	53/8007	1.71407e-08	5.37897e-08	1.07281e-08	5743/7422/841/1277/3627/6347/3383/3458/3569/6373/7040/4233/356	13
DOID:0050621	respiratory system benign neoplasm	11/275	36/8007	1.79887e-08	5.62821e-08	1.12252e-08	3565/4353/596/1026/3558/4318/5327/5054/6647/356/4133	11
DOID:10754	otitis media	9/275	22/8007	1.9617e-08	6.11934e-08	1.22048e-08	4843/3458/3586/3553/3569/3576/4313/4318/5054	9
DOID:231	motor neuron disease	24/275	187/8007	2.03138e-08	6.31783e-08	1.26007e-08	367/5743/2932/7422/836/6347/2950/3315/3481/3486/4313/4318/142/5444/6647/7124/2891/7076/3791/4233/351/2554/1432/779	24
DOID:11162	respiratory failure	13/275	55/8007	2.77952e-08	8.619e-08	1.71902e-08	7422/2152/3586/3553/3569/3576/1950/1364/4318/4846/5054/7040/356	13
DOID:1967	leiomyosarcoma	10/275	30/8007	3.17431e-08	9.78513e-08	1.9516e-08	596/332/595/1029/4313/4609/5925/7153/9332/4193	10
DOID:4230	smooth muscle cancer	10/275	30/8007	3.17431e-08	9.78513e-08	1.9516e-08	596/332/595/1029/4313/4609/5925/7153/9332/4193	10
DOID:0050938	breast lobular carcinoma	8/275	17/8007	3.25076e-08	9.93289e-08	1.98108e-08	2099/2100/11200/2064/4824/4318/5241/3320	8
DOID:3457	invasive lobular carcinoma	8/275	17/8007	3.25076e-08	9.93289e-08	1.98108e-08	2099/2100/11200/2064/4824/4318/5241/3320	8
DOID:9675	pulmonary emphysema	8/275	17/8007	3.25076e-08	9.93289e-08	1.98108e-08	1029/3458/581/4312/4313/4318/4233/5111	8
DOID:866	vein disease	11/275	38/8007	3.38871e-08	1.03242e-07	2.05912e-08	7157/7422/2944/3162/4314/4318/142/5054/7124/356/1559	11
DOID:3500	gallbladder adenocarcinoma	7/275	12/8007	3.57208e-08	1.08512e-07	2.16424e-08	1029/5594/1956/2064/9429/5595/4609	7
DOID:1123	spondyloarthropathy	15/275	77/8007	3.87916e-08	1.17499e-07	2.34347e-08	4843/1401/6347/3309/3458/3586/3553/3558/3569/1543/4314/4792/7124/6590/6288	15
DOID:3310	atopic dermatitis	21/275	152/8007	4.4298e-08	1.3379e-07	2.66839e-08	3565/5468/6532/7422/836/3627/1026/2944/2950/3162/3458/3586/3553/5328/5465/5970/6401/7124/7076/3356/2171	21
DOID:8469	influenza	18/275	113/8007	4.53675e-08	1.36095e-07	2.71435e-08	4843/7157/836/3627/6347/3383/3458/3586/3576/581/5444/5970/5054/6772/7040/7124/3551/5599	18
DOID:4610	intestinal benign neoplasm	10/275	31/8007	4.54517e-08	1.36095e-07	2.71435e-08	5743/3565/7422/596/332/598/1401/3091/3569/6288	10
DOID:9744	type 1 diabetes mellitus	10/275	31/8007	4.54517e-08	1.36095e-07	2.71435e-08	3565/3627/6347/3553/3558/3569/3576/4318/7124/356	10
DOID:2473	opportunistic mycosis	11/275	39/8007	4.57759e-08	1.36674e-07	2.7259e-08	3565/3627/3458/3586/3552/3553/3569/6772/7040/6590/1432	11
DOID:10325	silicosis	8/275	18/8007	5.6782e-08	1.69052e-07	3.37167e-08	4843/2950/3458/3586/3552/3553/7124/356	8
DOID:12704	ataxia telangiectasia	11/275	40/8007	6.12346e-08	1.8179e-07	3.62573e-08	7157/836/207/1026/1029/3091/581/1869/7299/1432/2475	11
DOID:2021	placenta cancer	11/275	41/8007	8.11631e-08	2.39592e-07	4.77856e-08	5468/7157/3458/3481/3643/9429/5728/5241/1588/3356/2475	11
DOID:3594	choriocarcinoma	11/275	41/8007	8.11631e-08	2.39592e-07	4.77856e-08	5468/7157/3458/3481/3643/9429/5728/5241/1588/3356/2475	11
DOID:1826	epilepsy syndrome	24/275	201/8007	8.33134e-08	2.45247e-07	4.89134e-08	4988/5743/6331/3565/6532/836/1509/6347/2950/3553/3569/3643/3757/1956/9429/4318/8856/6647/2891/4363/4193/2554/1135/1244	24
DOID:0002116	pterygium	9/275	26/8007	1.09161e-07	3.18641e-07	6.35516e-08	5743/7157/7422/332/2152/2944/3383/1543/7040	9
DOID:10139	conjunctival degeneration	9/275	26/8007	1.09161e-07	3.18641e-07	6.35516e-08	5743/7157/7422/332/2152/2944/3383/1543/7040	9
DOID:10526	conjunctival pterygium	9/275	26/8007	1.09161e-07	3.18641e-07	6.35516e-08	5743/7157/7422/332/2152/2944/3383/1543/7040	9
DOID:5119	ovarian cyst	6/275	9/8007	1.19769e-07	3.48631e-07	6.9533e-08	5743/7422/2950/4312/4313/4318	6
DOID:10223	dermatomyositis	10/275	34/8007	1.22636e-07	3.55e-07	7.08034e-08	7422/6347/3586/3552/3553/3569/4313/4318/7124/4233	10
DOID:11981	morbid obesity	10/275	34/8007	1.22636e-07	3.55e-07	7.08034e-08	5468/2099/2100/3383/6401/5054/7040/7124/9370/153	10
DOID:10140	dry eye syndrome	7/275	14/8007	1.45867e-07	4.18766e-07	8.35213e-08	3565/7157/3552/3569/4318/6647/356	7
DOID:1019	osteomyelitis	7/275	14/8007	1.45867e-07	4.18766e-07	8.35213e-08	3565/3552/3569/581/4312/5894/2936	7
DOID:1400	lacrimal apparatus disease	7/275	14/8007	1.45867e-07	4.18766e-07	8.35213e-08	3565/7157/3552/3569/4318/6647/356	7
DOID:14067	Plasmodium falciparum malaria	8/275	20/8007	1.53935e-07	4.39513e-07	8.76592e-08	1401/2944/2950/3458/3586/3553/653361/2539	8
DOID:1510	personality disorder	8/275	20/8007	1.53935e-07	4.39513e-07	8.76592e-08	6531/6532/4313/4318/7124/1814/4128/3358	8
DOID:12449	aplastic anemia	14/275	74/8007	1.63756e-07	4.66281e-07	9.29978e-08	4843/7157/2944/2950/3458/3586/1543/1576/581/1728/7124/356/3320/2475	14
DOID:1116	pertussis	10/275	35/8007	1.66539e-07	4.70359e-07	9.38113e-08	6347/3383/3586/3569/5594/5595/5970/6772/7076/6288	10
DOID:12716	newborn respiratory distress syndrome	10/275	35/8007	1.66539e-07	4.70359e-07	9.38113e-08	2152/3586/3553/3569/3576/1950/4318/5054/7040/356	10
DOID:3683	lung benign neoplasm	10/275	35/8007	1.66539e-07	4.70359e-07	9.38113e-08	3565/4353/596/3558/4318/5327/5054/6647/356/4133	10
DOID:10603	glucose intolerance	11/275	44/8007	1.79727e-07	5.04877e-07	1.00696e-07	5468/3162/3383/3643/6517/4846/5467/6401/9370/2805/1803	11
DOID:350	mastocytosis	11/275	44/8007	1.79727e-07	5.04877e-07	1.00696e-07	7422/596/598/3458/3569/3576/1869/4313/4609/7040/1131	11
DOID:303	substance-related disorder	13/275	64/8007	1.90669e-07	5.3418e-07	1.0654e-07	6331/6531/6532/595/3297/3481/3757/6530/4363/338/4128/3356/1813	13
DOID:3458	breast adenocarcinoma	11/275	45/8007	2.30703e-07	6.4461e-07	1.28565e-07	7157/857/595/5594/2064/5595/5925/5970/5054/2194/1432	11
DOID:235	colonic benign neoplasm	8/275	21/8007	2.41311e-07	6.72453e-07	1.34118e-07	5743/3565/596/332/598/1401/3569/6288	8
DOID:438	autoimmune disease of the nervous system	12/275	55/8007	2.48646e-07	6.91051e-07	1.37827e-07	2099/2100/3627/3586/3553/3569/4313/4318/7040/7124/2908/779	12
DOID:1395	schistosomiasis	7/275	15/8007	2.65505e-07	7.34001e-07	1.46394e-07	596/2152/3383/3458/3586/7124/4193	7
DOID:1884	viral hepatitis	7/275	15/8007	2.65505e-07	7.34001e-07	1.46394e-07	4843/3565/3586/3558/3576/7124/9536	7
DOID:4233	clear cell sarcoma	6/275	10/8007	2.90807e-07	8.01828e-07	1.59921e-07	2065/3481/1956/4609/5728/1385	6
DOID:0060071	pre-malignant neoplasm	8/275	22/8007	3.67993e-07	1.00144e-06	1.99733e-07	5743/332/857/595/1026/1029/4313/5111	8
DOID:11123	Henoch-Schoenlein purpura	8/275	22/8007	3.67993e-07	1.00144e-06	1.99733e-07	7422/847/3162/3553/3569/4318/5444/4233	8
DOID:14221	metabolic syndrome X	8/275	22/8007	3.67993e-07	1.00144e-06	1.99733e-07	5468/1401/2152/3486/3586/3569/9370/2475	8
DOID:1557	hypersensitivity reaction type III disease	8/275	22/8007	3.67993e-07	1.00144e-06	1.99733e-07	7422/847/3162/3553/3569/4318/5444/4233	8
DOID:9809	hypersensitivity vasculitis	8/275	22/8007	3.67993e-07	1.00144e-06	1.99733e-07	7422/847/3162/3553/3569/4318/5444/4233	8
DOID:615	leukopenia	11/275	47/8007	3.72355e-07	1.00806e-06	2.01053e-07	596/332/598/3458/3586/3558/3569/7040/7124/54658/1244	11
DOID:9973	substance dependence	11/275	47/8007	3.72355e-07	1.00806e-06	2.01053e-07	6331/6531/6532/595/3297/3481/3757/6530/4363/4128/3356	11
DOID:3713	ovary adenocarcinoma	10/275	38/8007	3.91403e-07	1.05689e-06	2.10792e-07	5743/7157/7422/3486/1956/581/4313/4318/5728/896	10
DOID:6590	spondylitis	13/275	68/8007	4.0251e-07	1.08408e-06	2.16215e-07	4843/1401/3309/3458/3586/3553/3558/3569/1543/4314/4792/7124/6288	13
DOID:10808	gastric ulcer	7/275	16/8007	4.58214e-07	1.22778e-06	2.44876e-07	4843/5742/5743/7422/3091/3553/4780	7
DOID:2615	papilloma	7/275	16/8007	4.58214e-07	1.22778e-06	2.44876e-07	7157/596/332/1029/1956/4313/5728	7
DOID:7147	ankylosing spondylitis	13/275	69/8007	4.8091e-07	1.2853e-06	2.56347e-07	4843/1401/3309/3458/3586/3553/3558/3569/1543/4314/4792/7124/6288	13
DOID:2234	focal epilepsy	12/275	59/8007	5.61117e-07	1.49583e-06	2.98338e-07	4988/5743/6532/836/1509/3553/3569/4318/6647/2891/4193/1135	12
DOID:11400	pyelonephritis	6/275	11/8007	6.21376e-07	1.64807e-06	3.287e-07	3627/3569/3576/4318/2805/7076	6
DOID:2744	pyelitis	6/275	11/8007	6.21376e-07	1.64807e-06	3.287e-07	3627/3569/3576/4318/2805/7076	6
DOID:1508	candidiasis	7/275	17/8007	7.56209e-07	1.99053e-06	3.97002e-07	3565/3627/3458/3586/6772/6590/1432	7
DOID:2055	post-traumatic stress disorder	7/275	17/8007	7.56209e-07	1.99053e-06	3.97002e-07	4129/6531/6532/3558/3569/3576/1813	7
DOID:8689	anorexia nervosa	7/275	17/8007	7.56209e-07	1.99053e-06	3.97002e-07	6532/3458/3569/6530/4128/3356/3358	7
DOID:10747	lymphoid leukemia	13/275	72/8007	8.04418e-07	2.1121e-06	4.2125e-07	5743/7422/196/595/1026/3576/4318/5327/5728/5054/4233/1803/2355	13
DOID:11030	corneal edema	5/275	7/8007	9.15025e-07	2.36683e-06	4.72056e-07	7157/332/1026/6649/7040	5
DOID:11031	bullous keratopathy	5/275	7/8007	9.15025e-07	2.36683e-06	4.72056e-07	7157/332/1026/6649/7040	5
DOID:5828	endometrioid ovary carcinoma	5/275	7/8007	9.15025e-07	2.36683e-06	4.72056e-07	7157/3486/581/4313/4318	5
DOID:8574	lichen disease	5/275	7/8007	9.15025e-07	2.36683e-06	4.72056e-07	596/3458/4313/4314/4318	5
DOID:869	cholesteatoma	5/275	7/8007	9.15025e-07	2.36683e-06	4.72056e-07	7422/1026/1029/1950/1956	5
DOID:9201	lichen planus	5/275	7/8007	9.15025e-07	2.36683e-06	4.72056e-07	596/3458/4313/4314/4318	5
DOID:1227	neutropenia	9/275	33/8007	1.09022e-06	2.79921e-06	5.58291e-07	596/332/3458/3586/3569/7040/7124/54658/1244	9
DOID:12987	agranulocytosis	9/275	33/8007	1.09022e-06	2.79921e-06	5.58291e-07	596/332/3458/3586/3569/7040/7124/54658/1244	9
DOID:3443	mammary Paget's disease	9/275	33/8007	1.09022e-06	2.79921e-06	5.58291e-07	7157/595/5594/2064/5595/5925/5970/2194/1432	9
DOID:0060118	thoracic disease	8/275	25/8007	1.13759e-06	2.89947e-06	5.78289e-07	367/2099/2100/596/1956/5728/1588/5111	8
DOID:13515	tuberous sclerosis	8/275	25/8007	1.13759e-06	2.89947e-06	5.78289e-07	6347/3383/581/7124/3551/4363/5111/2475	8
DOID:3463	breast disease	8/275	25/8007	1.13759e-06	2.89947e-06	5.78289e-07	367/2099/2100/596/1956/5728/1588/5111	8
DOID:3479	uveal cancer	7/275	18/8007	1.2013e-06	3.03208e-06	6.04737e-07	595/1029/3383/3458/4313/5111/3320	7
DOID:6039	uveal melanoma	7/275	18/8007	1.2013e-06	3.03208e-06	6.04737e-07	595/1029/3383/3458/4313/5111/3320	7
DOID:8719	in situ carcinoma	7/275	18/8007	1.2013e-06	3.03208e-06	6.04737e-07	5743/332/857/595/1026/4313/5111	7
DOID:14499	Fabry disease	6/275	12/8007	1.20703e-06	3.03208e-06	6.04737e-07	4843/3383/3569/4846/6401/7412	6
DOID:3382	liposarcoma	6/275	12/8007	1.20703e-06	3.03208e-06	6.04737e-07	3725/5468/1029/7153/4193/1019	6
DOID:3939	lipomatous cancer	6/275	12/8007	1.20703e-06	3.03208e-06	6.04737e-07	3725/5468/1029/7153/4193/1019	6
DOID:1100	ovarian disease	12/275	64/8007	1.41193e-06	3.53828e-06	7.05696e-07	367/5743/2099/7422/2950/3576/4312/4313/4318/5241/1588/1814	12
DOID:13250	diarrhea	9/275	34/8007	1.43855e-06	3.59637e-06	7.17281e-07	5743/6532/3586/3576/1956/9429/7124/54658/3359	9
DOID:9778	irritable bowel syndrome	13/275	76/8007	1.53189e-06	3.82058e-06	7.61999e-07	6331/5468/6532/7422/3383/3586/3558/3569/1950/8856/4363/3359/3356	13
DOID:13809	familial combined hyperlipidemia	8/275	26/8007	1.59467e-06	3.95828e-06	7.89462e-07	5468/5444/5465/5054/7498/9370/338/2335	8
DOID:9471	meningitis	8/275	26/8007	1.59467e-06	3.95828e-06	7.89462e-07	4353/7422/836/3383/3576/4313/4318/5328	8
DOID:1555	urticaria	10/275	44/8007	1.71151e-06	4.23822e-06	8.45295e-07	154/7422/847/240/2152/4318/6647/7040/7124/1131	10
DOID:10930	borderline personality disorder	7/275	19/8007	1.84654e-06	4.55102e-06	9.07682e-07	6531/6532/4313/4318/7124/4128/3358	7
DOID:2986	IgA glomerulonephritis	7/275	19/8007	1.84654e-06	4.55102e-06	9.07682e-07	3565/6347/3458/3586/3569/4318/6401	7
DOID:1184	nephrotic syndrome	11/275	55/8007	2.0029e-06	4.92479e-06	9.82229e-07	3565/7422/2152/2944/2950/3553/3576/5970/7040/338/2908	11
DOID:12895	keratoconjunctivitis sicca	6/275	13/8007	2.17723e-06	5.32835e-06	1.06272e-06	3565/7157/3552/4318/6647/356	6
DOID:9368	keratoconjunctivitis	6/275	13/8007	2.17723e-06	5.32835e-06	1.06272e-06	3565/7157/3552/4318/6647/356	6
DOID:2978	carbohydrate metabolic disorder	8/275	27/8007	2.19923e-06	5.36961e-06	1.07095e-06	3458/3481/3586/3569/3576/6517/2539/5837	8
DOID:12918	thromboangiitis obliterans	5/275	8/8007	2.37156e-06	5.75006e-06	1.14683e-06	3383/4314/4846/6401/7412	5
DOID:1496	echinococcosis	5/275	8/8007	2.37156e-06	5.75006e-06	1.14683e-06	5594/1543/5595/5599/1432	5
DOID:2283	keratopathy	5/275	8/8007	2.37156e-06	5.75006e-06	1.14683e-06	7157/332/1026/6649/7040	5
DOID:594	panic disorder	9/275	36/8007	2.43059e-06	5.87954e-06	1.17265e-06	2099/6532/3586/5241/6530/3359/4128/3356/1813	9
DOID:1532	pleural disease	7/275	20/8007	2.75794e-06	6.62539e-06	1.32141e-06	7157/3091/3162/3383/4318/6647/356	7
DOID:452	pleomorphic adenoma	7/275	20/8007	2.75794e-06	6.62539e-06	1.32141e-06	367/890/7157/595/1029/2064/4193	7
DOID:9007	sudden infant death syndrome	7/275	20/8007	2.75794e-06	6.62539e-06	1.32141e-06	6331/6532/836/3586/3569/3757/4128	7
DOID:576	proteinuria	12/275	68/8007	2.7691e-06	6.63696e-06	1.32371e-06	4306/7422/6347/2152/3162/3552/5328/6772/7040/9370/1559/2539	12
DOID:2527	nephrosis	11/275	57/8007	2.90544e-06	6.94778e-06	1.38571e-06	3565/7422/2152/2944/2950/3553/3576/5970/7040/338/2908	11
DOID:349	systemic mastocytosis	9/275	38/8007	3.96193e-06	9.45255e-06	1.88527e-06	7422/3458/3569/3576/1869/4313/4609/7040/1131	9
DOID:4798	aggressive systemic mastocytosis	8/275	29/8007	4.00466e-06	9.51697e-06	1.89812e-06	7422/3458/3569/3576/1869/4313/7040/1131	8
DOID:8283	peritonitis	7/275	21/8007	4.01625e-06	9.51697e-06	1.89812e-06	4843/1401/6347/3576/2920/7124/356	7
DOID:9743	diabetic neuropathy	7/275	21/8007	4.01625e-06	9.51697e-06	1.89812e-06	7422/4846/142/5327/5970/7056/5580	7
DOID:2218	blood platelet disease	14/275	96/8007	4.35913e-06	1.03061e-05	2.05551e-06	367/54205/7422/598/1401/3627/3383/3569/3576/5328/5054/7040/7056/356	14
DOID:3328	temporal lobe epilepsy	10/275	49/8007	4.86913e-06	1.14859e-05	2.29081e-06	4988/5743/6532/836/1509/3553/4318/6647/2891/4193	10
DOID:10871	age related macular degeneration	12/275	72/8007	5.16778e-06	1.21356e-05	2.42039e-06	4843/7422/1401/6347/2944/2950/3091/3383/5444/6401/7124/3791	12
DOID:2007	degeneration of macula and posterior pole	12/275	72/8007	5.16778e-06	1.21356e-05	2.42039e-06	4843/7422/1401/6347/2944/2950/3091/3383/5444/6401/7124/3791	12
DOID:230	lateral sclerosis	15/275	111/8007	5.22625e-06	1.22454e-05	2.44229e-06	7422/836/6347/2950/4313/4318/142/5444/6647/7124/2891/7076/4233/351/779	15
DOID:10933	obsessive-compulsive disorder	7/275	22/8007	5.71877e-06	1.32803e-05	2.6487e-06	6531/6532/3558/3569/3359/3356/1813	7
DOID:13089	intracranial arterial disease	7/275	22/8007	5.71877e-06	1.32803e-05	2.6487e-06	836/3569/4313/4314/4846/7124/7076	7
DOID:3369	peripheral primitive neuroectodermal tumor	7/275	22/8007	5.71877e-06	1.32803e-05	2.6487e-06	5743/841/1029/3315/3486/4312/4314	7
DOID:3527	cerebral arterial disease	7/275	22/8007	5.71877e-06	1.32803e-05	2.6487e-06	836/3569/4313/4314/4846/7124/7076	7
DOID:11383	cryptorchidism	6/275	15/8007	5.99092e-06	1.38053e-05	2.7534e-06	367/2099/3486/1950/1956/5894	6
DOID:12129	bulimia nervosa	6/275	15/8007	5.99092e-06	1.38053e-05	2.7534e-06	6532/9370/2908/1803/3356/3358	6
DOID:0060049	autoimmune disease of urogenital tract	12/275	73/8007	5.99769e-06	1.38053e-05	2.7534e-06	4843/3627/857/1026/1147/2950/3383/7040/7124/4363/2805/2335	12
DOID:12236	primary biliary cirrhosis	12/275	73/8007	5.99769e-06	1.38053e-05	2.7534e-06	4843/3627/857/1026/1147/2950/3383/7040/7124/4363/2805/2335	12
DOID:10310	viral meningitis	4/275	5/8007	6.6268e-06	1.52198e-05	3.03553e-06	3383/3576/4313/4318	4
DOID:319	spinal cord disease	8/275	31/8007	6.93272e-06	1.5875e-05	3.1662e-06	367/7422/1277/3586/3569/3576/4318/1244	8
DOID:4448	macular degeneration	12/275	74/8007	6.94246e-06	1.5875e-05	3.1662e-06	4843/7422/1401/6347/2944/2950/3091/3383/5444/6401/7124/3791	12
DOID:1790	malignant mesothelioma	9/275	41/8007	7.7778e-06	1.77076e-05	3.53172e-06	7422/1029/3091/6696/4313/4318/5970/331/2475	9
DOID:437	myasthenia gravis	9/275	41/8007	7.7778e-06	1.77076e-05	3.53172e-06	2099/2100/3627/3586/3569/7040/7124/2908/779	9
DOID:706	mature B-cell neoplasm	7/275	23/8007	7.98117e-06	1.80918e-05	3.60834e-06	598/595/3586/3569/581/4609/4233	7
DOID:707	B-cell lymphoma	7/275	23/8007	7.98117e-06	1.80918e-05	3.60834e-06	598/595/3586/3569/581/4609/4233	7
DOID:2706	synovium cancer	8/275	32/8007	8.97121e-06	2.02482e-05	4.03842e-06	332/3553/1956/2064/4313/5728/11186/4193	8
DOID:5485	synovial sarcoma	8/275	32/8007	8.97121e-06	2.02482e-05	4.03842e-06	332/3553/1956/2064/4313/5728/11186/4193	8
DOID:439	neuromuscular junction disease	9/275	42/8007	9.60485e-06	2.16316e-05	4.31434e-06	2099/2100/3627/3586/3569/7040/7124/2908/779	9
DOID:3179	inverted papilloma	5/275	10/8007	1.00818e-05	2.26569e-05	4.51882e-06	596/332/1029/1956/5728	5
DOID:2154	nephroblastoma	12/275	77/8007	1.06053e-05	2.37823e-05	4.74328e-06	367/5743/2099/7157/596/1026/3481/2064/6772/1588/4233/3320	12
DOID:169	neuroendocrine tumor	7/275	24/8007	1.09393e-05	2.44788e-05	4.88219e-06	596/841/595/1026/3569/581/6530	7
DOID:10941	intracranial aneurysm	6/275	17/8007	1.39765e-05	3.08784e-05	6.15857e-06	836/3569/4313/4846/7124/7076	6
DOID:10976	membranous glomerulonephritis	6/275	17/8007	1.39765e-05	3.08784e-05	6.15857e-06	231/1281/3569/5578/5579/5054	6
DOID:47	prostate disease	6/275	17/8007	1.39765e-05	3.08784e-05	6.15857e-06	3586/3553/1956/55/4824/1588	6
DOID:84	osteochondritis dissecans	6/275	17/8007	1.39765e-05	3.08784e-05	6.15857e-06	6531/6532/4314/7124/3356/1813	6
DOID:8923	skin melanoma	6/275	17/8007	1.39765e-05	3.08784e-05	6.15857e-06	836/1026/1029/581/4233/5111	6
DOID:9253	gastrointestinal stromal tumor	6/275	17/8007	1.39765e-05	3.08784e-05	6.15857e-06	596/1026/1029/3481/581/4363	6
DOID:6050	esophageal disease	10/275	55/8007	1.44435e-05	3.18427e-05	6.35091e-06	890/6347/1029/2944/2950/3315/3553/3569/3576/891	10
DOID:1927	sphingolipidosis	8/275	34/8007	1.45869e-05	3.20237e-05	6.38699e-06	4843/6531/6532/3383/3569/4846/6401/7412	8
DOID:811	lipodystrophy	8/275	34/8007	1.45869e-05	3.20237e-05	6.38699e-06	5468/857/6347/3458/3569/3576/7124/9370	8
DOID:4988	alcoholic pancreatitis	5/275	11/8007	1.79654e-05	3.93582e-05	7.84984e-06	6347/2950/3458/3586/7124	5
DOID:1923	sex differentiation disease	8/275	35/8007	1.83522e-05	4.01214e-05	8.00205e-06	367/3569/3643/5728/5054/8644/1588/2908	8
DOID:14654	prostatitis	4/275	6/8007	1.93424e-05	4.20225e-05	8.38122e-06	3586/3553/55/4824	4
DOID:2733	skin atrophy	4/275	6/8007	1.93424e-05	4.20225e-05	8.38122e-06	6256/581/3791/351	4
DOID:559	acute pyelonephritis	4/275	6/8007	1.93424e-05	4.20225e-05	8.38122e-06	3569/3576/4318/7076	4
DOID:3978	extrinsic cardiomyopathy	7/275	26/8007	1.95982e-05	4.24019e-05	8.45689e-06	6347/2152/3458/3569/6696/4313/4318	7
DOID:820	myocarditis	7/275	26/8007	1.95982e-05	4.24019e-05	8.45689e-06	6347/2152/3458/3569/6696/4313/4318	7
DOID:200	giant cell tumor	6/275	18/8007	2.03642e-05	4.37871e-05	8.73317e-06	5743/890/7157/332/595/4233	6
DOID:365	bladder disease	6/275	18/8007	2.03642e-05	4.37871e-05	8.73317e-06	7157/2950/3569/1950/5111/1129	6
DOID:9428	intracranial hypertension	6/275	18/8007	2.03642e-05	4.37871e-05	8.73317e-06	836/841/3627/3553/7124/356	6
DOID:3602	toxic encephalopathy	9/275	46/8007	2.10358e-05	4.51383e-05	9.00266e-06	5743/596/598/581/4312/6647/2891/351/1813	9
DOID:12337	varicocele	5/275	12/8007	2.99357e-05	6.3583e-05	1.26814e-05	7157/2944/3162/142/356	5
DOID:14018	alcoholic liver cirrhosis	5/275	12/8007	2.99357e-05	6.3583e-05	1.26814e-05	3565/4353/3569/3576/7040	5
DOID:4305	bone giant cell tumor	5/275	12/8007	2.99357e-05	6.3583e-05	1.26814e-05	5743/7157/332/595/4233	5
DOID:8502	bullous skin disease	5/275	12/8007	2.99357e-05	6.3583e-05	1.26814e-05	3315/3383/3586/5328/6401	5
DOID:9742	pelvic varices	5/275	12/8007	2.99357e-05	6.3583e-05	1.26814e-05	7157/2944/3162/142/356	5
DOID:11260	rabies	10/275	60/8007	3.19919e-05	6.78125e-05	1.35249e-05	367/596/836/598/857/3558/6772/6646/351/4069	10
DOID:3973	thyroid medullary carcinoma	8/275	38/8007	3.4865e-05	7.3753e-05	1.47097e-05	2099/2100/7422/207/595/4313/3791/2475	8
DOID:574	peripheral nervous system disease	11/275	74/8007	3.91834e-05	8.27205e-05	1.64983e-05	2099/6532/7422/3458/3586/3569/4313/4318/7124/5241/351	11
DOID:8632	Kaposi's sarcoma	6/275	20/8007	4.01191e-05	8.45251e-05	1.68582e-05	3565/3383/3569/3576/4313/4609	6
DOID:8778	Crohn's disease	9/275	50/8007	4.24087e-05	8.91691e-05	1.77844e-05	3565/3383/3458/3586/3569/3576/4312/4314/8856	9
DOID:1712	aortic valve stenosis	7/275	29/8007	4.25612e-05	8.93101e-05	1.78125e-05	7422/240/650/6696/5444/7124/338	7
DOID:0050292	primary systemic mycosis	4/275	7/8007	4.39122e-05	9.12292e-05	1.81953e-05	4843/3565/3458/3586	4
DOID:0060043	sexual disorder	4/275	7/8007	4.39122e-05	9.12292e-05	1.81953e-05	6532/7040/3356/3358	4
DOID:11294	arteriovenous malformation	4/275	7/8007	4.39122e-05	9.12292e-05	1.81953e-05	7422/3553/3569/4314	4
DOID:14004	thoracic aortic aneurysm	4/275	7/8007	4.39122e-05	9.12292e-05	1.81953e-05	4313/4318/5579/2335	4
DOID:5773	oral submucous fibrosis	4/275	7/8007	4.39122e-05	9.12292e-05	1.81953e-05	332/2944/3091/4314	4
DOID:12571	phacogenic glaucoma	5/275	13/8007	4.72848e-05	9.76534e-05	1.94766e-05	4312/4314/5444/7124/7498	5
DOID:13608	biliary atresia	5/275	13/8007	4.72848e-05	9.76534e-05	1.94766e-05	7422/3383/6696/6401/7076	5
DOID:13641	exfoliation syndrome	5/275	13/8007	4.72848e-05	9.76534e-05	1.94766e-05	4312/4314/5444/7124/7498	5
DOID:715	T-cell leukemia	10/275	63/8007	4.95187e-05	0.000102065	2.03565e-05	7422/196/595/1026/3576/4318/5728/4233/1803/2355	10
DOID:4079	heart valve disease	9/275	51/8007	4.99695e-05	0.000102792	2.05014e-05	7422/240/650/1281/6696/5328/5444/7124/338	9
DOID:480	movement disease	11/275	76/8007	5.05158e-05	0.000103711	2.06848e-05	1128/6531/7422/5444/1814/1559/1129/2554/1132/1813/125	11
DOID:5940	malignant peripheral nerve sheath tumor	6/275	21/8007	5.45602e-05	0.000111795	2.22971e-05	7157/650/1029/1956/5728/1019	6
DOID:987	alopecia	9/275	52/8007	5.86373e-05	0.000119914	2.39163e-05	367/5468/4306/6347/3383/3458/3569/4846/356	9
DOID:0060060	non-Hodgkin lymphoma	8/275	41/8007	6.22881e-05	0.000127131	2.53558e-05	598/595/1029/3586/3569/581/4609/4233	8
DOID:1003	pelvic inflammatory disease	5/275	14/8007	7.14981e-05	0.000143684	2.86571e-05	4353/6347/3458/4313/4318	5
DOID:11119	Gilles de la Tourette syndrome	5/275	14/8007	7.14981e-05	0.000143684	2.86571e-05	6531/3558/3359/3358/1813	5
DOID:121	vaginal disease	5/275	14/8007	7.14981e-05	0.000143684	2.86571e-05	3565/3553/3569/3576/5578	5
DOID:12689	acoustic neuroma	5/275	14/8007	7.14981e-05	0.000143684	2.86571e-05	2099/595/1956/5925/7040	5
DOID:13976	peptic esophagitis	5/275	14/8007	7.14981e-05	0.000143684	2.86571e-05	6347/2944/2950/3553/3576	5
DOID:2170	vaginitis	5/275	14/8007	7.14981e-05	0.000143684	2.86571e-05	3565/3553/3569/3576/5578	5
DOID:2913	acute pancreatitis	5/275	14/8007	7.14981e-05	0.000143684	2.86571e-05	6347/3297/3586/6401/6647	5
DOID:3385	bacterial vaginosis	5/275	14/8007	7.14981e-05	0.000143684	2.86571e-05	3565/3553/3569/3576/5578	5
DOID:640	encephalomyelitis	6/275	22/8007	7.28758e-05	0.000146171	2.91533e-05	3627/3383/3659/142/7124/3551	6
DOID:10923	sickle cell anemia	8/275	42/8007	7.46841e-05	0.000149225	2.97624e-05	5743/4353/3383/3486/3553/7124/7412/54658	8
DOID:3298	vaccinia	8/275	42/8007	7.46841e-05	0.000149225	2.97624e-05	3725/596/3458/3552/5594/2064/581/4170	8
DOID:10247	pleurisy	4/275	8/8007	8.54529e-05	0.000168806	3.36677e-05	7157/3383/4318/356	4
DOID:10264	mumps	4/275	8/8007	8.54529e-05	0.000168806	3.36677e-05	3627/3315/3383/6772	4
DOID:1659	supratentorial cancer	4/275	8/8007	8.54529e-05	0.000168806	3.36677e-05	7157/332/1029/11186	4
DOID:2799	bronchiolitis obliterans	4/275	8/8007	8.54529e-05	0.000168806	3.36677e-05	3458/3569/3576/4318	4
DOID:3675	childhood kidney neoplasm	4/275	8/8007	8.54529e-05	0.000168806	3.36677e-05	595/1029/3481/6696	4
DOID:3721	plasmacytoma	4/275	8/8007	8.54529e-05	0.000168806	3.36677e-05	598/595/3569/4233	4
DOID:5183	hereditary Wilms' tumor	9/275	55/8007	9.25988e-05	0.000182233	3.63457e-05	367/2099/7157/596/1026/3481/2064/1588/3320	9
DOID:9588	encephalitis	9/275	55/8007	9.25988e-05	0.000182233	3.63457e-05	7422/3458/3569/3576/6772/7412/9332/351/347	9
DOID:10126	keratoconus	6/275	23/8007	9.57798e-05	0.000188139	3.75235e-05	3553/6649/6647/7040/6590/125	6
DOID:1588	thrombocytopenia	10/275	68/8007	9.68272e-05	0.000189839	3.78627e-05	54205/1401/3627/3383/3569/3576/5054/7040/7056/356	10
DOID:0060115	nervous system benign neoplasm	7/275	33/8007	0.000103543	0.000202247	4.03374e-05	2099/650/595/3569/1956/5925/7040	7
DOID:3277	thymus cancer	7/275	33/8007	0.000103543	0.000202247	4.03374e-05	2099/598/1956/4313/4318/5728/331	7
DOID:2769	tic disorder	5/275	15/8007	0.000104252	0.000202874	4.04623e-05	6531/3558/3359/3358/1813	5
DOID:3948	adrenocortical carcinoma	5/275	15/8007	0.000104252	0.000202874	4.04623e-05	2100/7157/650/595/891	5
DOID:272	hepatic vascular disease	6/275	24/8007	0.00012406	0.000239193	4.77061e-05	3162/4846/5054/7040/7076/1559	6
DOID:3151	skin squamous cell carcinoma	6/275	24/8007	0.00012406	0.000239193	4.77061e-05	7157/598/595/1029/4312/4313	6
DOID:4468	clear cell adenocarcinoma	6/275	24/8007	0.00012406	0.000239193	4.77061e-05	7422/3091/4313/5728/331/2475	6
DOID:6543	acne	6/275	24/8007	0.00012406	0.000239193	4.77061e-05	367/3552/3569/4313/7124/1803	6
DOID:9098	sebaceous gland disease	6/275	24/8007	0.00012406	0.000239193	4.77061e-05	367/3552/3569/4313/7124/1803	6
DOID:11830	myopia	8/275	45/8007	0.000124732	0.000239604	4.7788e-05	1128/1277/4312/4313/4314/4318/7040/4233	8
DOID:3113	papillary carcinoma	8/275	45/8007	0.000124732	0.000239604	4.7788e-05	836/1029/2064/1364/11186/860/7076/4233	8
DOID:62	aortic valve disease	7/275	34/8007	0.000126605	0.000242757	4.8417e-05	7422/240/650/6696/5444/7124/338	7
DOID:9835	refractive error	10/275	71/8007	0.00014043	0.000268771	5.36053e-05	1128/596/1277/4312/4313/4314/4318/7040/3949/4233	10
DOID:3480	uveal disease	8/275	46/8007	0.000146562	0.000279996	5.5844e-05	6347/3383/3458/4312/4314/5444/7124/7498	8
DOID:1993	rectum cancer	5/275	16/8007	0.000147407	0.000280583	5.59612e-05	5743/596/836/581/4318	5
DOID:9637	stomatitis	5/275	16/8007	0.000147407	0.000280583	5.59612e-05	6532/3458/3552/3553/3569	5
DOID:1729	retinal vascular occlusion	4/275	9/8007	0.000149666	0.00028385	5.66127e-05	7422/3586/3569/5054	4
DOID:461	muscle benign neoplasm	4/275	9/8007	0.000149666	0.00028385	5.66127e-05	596/857/1026/4313	4
DOID:4535	hypotrichosis	9/275	59/8007	0.000162278	0.000307211	6.12719e-05	367/5468/4306/6347/3383/3458/3569/4846/356	9
DOID:0060038	specific developmental disorder	19/275	220/8007	0.000192012	0.000362845	7.23679e-05	4129/6531/6532/7157/3458/3558/3569/6530/9370/1814/3359/4128/150/2908/1803/3356/1812/3358/1813	19
DOID:3192	neurilemmoma	6/275	26/8007	0.000200273	0.000377771	7.53448e-05	2099/650/595/1956/5925/7040	6
DOID:0060033	autoimmune disease of peripheral nervous system	5/275	17/8007	0.000203003	0.000380175	7.58245e-05	3553/4313/4318/7124/2908	5
DOID:10762	portal hypertension	5/275	17/8007	0.000203003	0.000380175	7.58245e-05	3162/4846/5054/7040/7076	5
DOID:12842	Guillain-Barre syndrome	5/275	17/8007	0.000203003	0.000380175	7.58245e-05	3553/4313/4318/7124/2908	5
DOID:240	iris disease	5/275	17/8007	0.000203003	0.000380175	7.58245e-05	4312/4314/5444/7124/7498	5
DOID:11984	hypertrophic cardiomyopathy	9/275	62/8007	0.000239434	0.000447599	8.92719e-05	367/2099/332/6347/2697/3486/4313/4846/5894	9
DOID:0050598	extrapulmonary tuberculosis	4/275	10/8007	0.000242723	0.000448136	8.9379e-05	3383/7040/7124/356	4
DOID:0060099	musculoskeletal system benign neoplasm	4/275	10/8007	0.000242723	0.000448136	8.9379e-05	596/857/1026/4313	4
DOID:106	pleural tuberculosis	4/275	10/8007	0.000242723	0.000448136	8.9379e-05	3383/7040/7124/356	4
DOID:1229	paranoid schizophrenia	4/275	10/8007	0.000242723	0.000448136	8.9379e-05	3458/3586/3569/1544	4
DOID:2738	pseudoxanthoma elasticum	4/275	10/8007	0.000242723	0.000448136	8.9379e-05	3383/4313/6401/4363	4
DOID:6536	plasma cell neoplasm	4/275	10/8007	0.000242723	0.000448136	8.9379e-05	598/595/3569/4233	4
DOID:9993	hypoglycemia	4/275	10/8007	0.000242723	0.000448136	8.9379e-05	4306/3553/3569/6517	4
DOID:13129	severe pre-eclampsia	6/275	27/8007	0.000250154	0.000460231	9.17911e-05	3569/3576/5054/7056/356/3053	6
DOID:2513	basal cell carcinoma	6/275	27/8007	0.000250154	0.000460231	9.17911e-05	5743/650/1029/3569/3576/4170	6
DOID:1596	mental depression	7/275	38/8007	0.000264057	0.000484955	9.67224e-05	367/6531/6532/6347/3576/4128/3356	7
DOID:627	severe combined immunodeficiency	8/275	50/8007	0.000267734	0.000490846	9.78972e-05	6532/650/4609/7124/3791/4233/331/1803	8
DOID:1852	intrahepatic cholestasis	5/275	18/8007	0.000273248	0.000498333	9.93904e-05	2100/7157/3091/8856/1244	5
DOID:302	substance abuse	5/275	18/8007	0.000273248	0.000498333	9.93904e-05	6531/6532/338/4128/1813	5
DOID:660	adrenal cortex cancer	5/275	18/8007	0.000273248	0.000498333	9.93904e-05	2100/7157/650/595/891	5
DOID:643	progressive multifocal leukoencephalopathy	9/275	64/8007	0.000306128	0.000557324	0.000111156	7157/332/11200/2152/3091/3569/1956/4609/4069	9
DOID:2001	neuroma	6/275	28/8007	0.000309308	0.000560186	0.000111727	2099/650/595/1956/5925/7040	6
DOID:4440	seminoma	6/275	28/8007	0.000309308	0.000560186	0.000111727	7157/596/2697/581/5925/356	6
DOID:8552	chronic myeloid leukemia	6/275	28/8007	0.000309308	0.000560186	0.000111727	596/598/595/1026/1029/4170	6
DOID:12336	male infertility	12/275	108/8007	0.000312007	0.000564096	0.000112507	367/2099/8648/7157/596/2944/3315/1543/7124/1588/338/356	12
DOID:421	hair disease	9/275	65/8007	0.000344836	0.000622372	0.00012413	367/5468/4306/6347/3383/3458/3569/4846/356	9
DOID:628	combined T cell and B cell immunodeficiency	8/275	52/8007	0.000353632	0.000637147	0.000127076	6532/650/4609/7124/3791/4233/331/1803	8
DOID:2957	pulmonary tuberculosis	5/275	19/8007	0.000360512	0.000647311	0.000129104	3565/6347/3458/3586/5970	5
DOID:3095	germ cell and embryonal cancer	5/275	19/8007	0.000360512	0.000647311	0.000129104	7157/332/1029/2946/2064	5
DOID:3111	cystadenocarcinoma	7/275	40/8007	0.000367839	0.000658206	0.000131276	5743/7157/1029/3458/1956/2064/7124	7
DOID:3114	serous cystadenocarcinoma	7/275	40/8007	0.000367839	0.000658206	0.000131276	5743/7157/1029/3458/1956/2064/7124	7
DOID:10273	heart conduction disease	4/275	11/8007	0.000371155	0.000660745	0.000131783	6331/650/7040/7124	4
DOID:3307	teratoma	4/275	11/8007	0.000371155	0.000660745	0.000131783	7157/332/1029/2946	4
DOID:3507	dermatofibrosarcoma protuberans	4/275	11/8007	0.000371155	0.000660745	0.000131783	5743/7157/1277/347	4
DOID:11963	esophagitis	6/275	29/8007	0.000378895	0.000669765	0.000133582	6347/2944/2950/3553/3569/3576	6
DOID:3193	peripheral nerve sheath neoplasm	6/275	29/8007	0.000378895	0.000669765	0.000133582	7157/650/1029/1956/5728/1019	6
DOID:10964	cholesteatoma of middle ear	3/275	5/8007	0.000380709	0.000669765	0.000133582	1029/1950/1956	3
DOID:11433	middle ear cholesteatoma	3/275	5/8007	0.000380709	0.000669765	0.000133582	1029/1950/1956	3
DOID:12995	conduct disorder	3/275	5/8007	0.000380709	0.000669765	0.000133582	6531/6532/1813	3
DOID:4247	coronary restenosis	3/275	5/8007	0.000380709	0.000669765	0.000133582	4313/4314/7124	3
DOID:5078	ganglioglioma	3/275	5/8007	0.000380709	0.000669765	0.000133582	890/7157/891	3
DOID:1443	cerebral degeneration	9/275	67/8007	0.000434417	0.000762968	0.000152171	6531/6532/836/3586/3569/5327/356/1432/2475	9
DOID:13406	pulmonary sarcoidosis	5/275	20/8007	0.000467309	0.000815256	0.0001626	7422/3627/3458/4792/7124	5
DOID:4676	uremia	5/275	20/8007	0.000467309	0.000815256	0.0001626	595/3586/3569/5444/860	5
DOID:4990	essential tremor	5/275	20/8007	0.000467309	0.000815256	0.0001626	6531/5444/1814/1559/125	5
DOID:9120	amyloidosis	5/275	20/8007	0.000467309	0.000815256	0.0001626	4314/6647/351/4069/6288	5
DOID:0060082	breast benign neoplasm	4/275	12/8007	0.000541765	0.000937325	0.000186946	2697/3486/2064/55	4
DOID:0060097	thoracic benign neoplasm	4/275	12/8007	0.000541765	0.000937325	0.000186946	2697/3486/2064/55	4
DOID:11266	hemorrhagic fever with renal syndrome	4/275	12/8007	0.000541765	0.000937325	0.000186946	3383/3569/7412/2335	4
DOID:6196	reactive arthritis	4/275	12/8007	0.000541765	0.000937325	0.000186946	3627/3458/3576/1543	4
DOID:7757	childhood leukemia	4/275	12/8007	0.000541765	0.000937325	0.000186946	5743/1543/1728/8644	4
DOID:2583	agammaglobulinemia	6/275	31/8007	0.000554353	0.000955939	0.000190658	3565/959/3586/3569/5328/331	6
DOID:620	blood protein disease	6/275	31/8007	0.000554353	0.000955939	0.000190658	3565/959/3586/3569/5328/331	6
DOID:10113	trypanosomiasis	5/275	21/8007	0.000596294	0.00102488	0.000204408	3627/3458/3586/3569/7124	5
DOID:3953	adrenal gland cancer	5/275	21/8007	0.000596294	0.00102488	0.000204408	2100/7157/650/595/891	5
DOID:0080014	chromosomal disease	13/275	135/8007	0.000718531	0.00123295	0.000245906	367/836/6347/3315/3569/6647/9370/5111/351/4128/760/2554/3358	13
DOID:1414	ovarian dysfunction	3/275	6/8007	0.000742075	0.00125888	0.000251078	2099/5241/1588	3
DOID:14291	LEOPARD syndrome	3/275	6/8007	0.000742075	0.00125888	0.000251078	2932/207/5894	3
DOID:14320	generalized anxiety disorder	3/275	6/8007	0.000742075	0.00125888	0.000251078	6532/3569/4128	3
DOID:1907	malignant fibroxanthoma	3/275	6/8007	0.000742075	0.00125888	0.000251078	4843/1029/5925	3
DOID:2058	chronic mucocutaneous candidiasis	3/275	6/8007	0.000742075	0.00125888	0.000251078	3458/3586/6772	3
DOID:2559	opiate dependence	3/275	6/8007	0.000742075	0.00125888	0.000251078	6531/6532/3356	3
DOID:3669	intermittent claudication	3/275	6/8007	0.000742075	0.00125888	0.000251078	959/3586/54658	3
DOID:6741	bilateral breast cancer	5/275	22/8007	0.00075024	0.00127067	0.000253429	6531/7157/11200/5925/4128	5
DOID:6132	bronchitis	4/275	13/8007	0.000761534	0.00128563	0.000256413	7422/7040/7056/7124	4
DOID:678	progressive supranuclear palsy	4/275	13/8007	0.000761534	0.00128563	0.000256413	1128/7422/1129/1132	4
DOID:0080015	physical disorder	13/275	136/8007	0.000770573	0.00129879	0.000259038	367/3284/2099/2100/3486/1543/1950/1956/6696/5728/5894/338/1111	13
DOID:0060121	integumentary system benign neoplasm	6/275	33/8007	0.000787192	0.00132041	0.000263351	367/5743/650/3481/3569/4318	6
DOID:2115	B cell deficiency	6/275	33/8007	0.000787192	0.00132041	0.000263351	3565/959/3586/3569/5328/331	6
DOID:3165	skin benign neoplasm	6/275	33/8007	0.000787192	0.00132041	0.000263351	367/5743/650/3481/3569/4318	6
DOID:110	lens disease	8/275	59/8007	0.000846688	0.00141566	0.000282348	23411/596/2944/5444/6401/5111/2335/23424	8
DOID:83	cataract	8/275	59/8007	0.000846688	0.00141566	0.000282348	23411/596/2944/5444/6401/5111/2335/23424	8
DOID:10892	hypospadias	5/275	23/8007	0.000932035	0.00155587	0.000310312	367/3284/2099/2100/1543	5
DOID:12241	beta thalassemia	4/275	14/8007	0.00103755	0.00171829	0.000342705	2944/3569/3576/1544	4
DOID:3149	keratoacanthoma	4/275	14/8007	0.00103755	0.00171829	0.000342705	7157/598/595/1029	4
DOID:4231	histiocytoma	4/275	14/8007	0.00103755	0.00171829	0.000342705	4843/1029/5925/1385	4
DOID:6204	follicular adenoma	4/275	14/8007	0.00103755	0.00171829	0.000342705	595/1029/5327/896	4
DOID:9563	bronchiectasis	4/275	14/8007	0.00103755	0.00171829	0.000342705	154/3458/4312/4318	4
DOID:3907	lung squamous cell carcinoma	5/275	24/8007	0.00114466	0.00189267	0.000377486	5743/7157/332/1026/2475	5
DOID:10320	asbestosis	3/275	7/8007	0.0012657	0.00204745	0.000408356	847/2950/6649	3
DOID:10854	salivary gland disease	3/275	7/8007	0.0012657	0.00204745	0.000408356	4313/4318/6590	3
DOID:11168	anogenital venereal wart	3/275	7/8007	0.0012657	0.00204745	0.000408356	5743/5468/7422	3
DOID:1245	vulva cancer	3/275	7/8007	0.0012657	0.00204745	0.000408356	5743/7157/836	3
DOID:12698	gynecomastia	3/275	7/8007	0.0012657	0.00204745	0.000408356	367/5728/1588	3
DOID:12700	hyperprolactinemia	3/275	7/8007	0.0012657	0.00204745	0.000408356	3643/2064/1813	3
DOID:1294	vulva carcinoma	3/275	7/8007	0.0012657	0.00204745	0.000408356	5743/7157/836	3
DOID:1673	pneumothorax	3/275	7/8007	0.0012657	0.00204745	0.000408356	3091/3162/6647	3
DOID:1727	retinal vein occlusion	3/275	7/8007	0.0012657	0.00204745	0.000408356	7422/3569/5054	3
DOID:1996	rectum adenocarcinoma	3/275	7/8007	0.0012657	0.00204745	0.000408356	596/581/4318	3
DOID:2024	placental choriocarcinoma	3/275	7/8007	0.0012657	0.00204745	0.000408356	9429/5241/2475	3
DOID:2025	gestational choriocarcinoma	3/275	7/8007	0.0012657	0.00204745	0.000408356	9429/5241/2475	3
DOID:3672	rhabdoid cancer	3/275	7/8007	0.0012657	0.00204745	0.000408356	595/1029/6696	3
DOID:8544	chronic fatigue syndrome	3/275	7/8007	0.0012657	0.00204745	0.000408356	5743/6532/3356	3
DOID:10241	thalassemia	7/275	49/8007	0.00130221	0.00210002	0.00041884	1277/2944/3569/3576/1544/1576/54658	7
DOID:10579	leukodystrophy	7/275	49/8007	0.00130221	0.00210002	0.00041884	6531/6532/3586/3569/5327/1432/2475	7
DOID:0060101	benign glioma	4/275	15/8007	0.00137693	0.00220689	0.000440155	595/1029/2064/2475	4
DOID:2891	thyroid adenoma	4/275	15/8007	0.00137693	0.00220689	0.000440155	595/1029/5327/896	4
DOID:4844	benign ependymoma	4/275	15/8007	0.00137693	0.00220689	0.000440155	595/1029/2064/2475	4
DOID:4851	pilocytic astrocytoma	4/275	15/8007	0.00137693	0.00220689	0.000440155	7157/207/2065/5894	4
DOID:11613	hyperandrogenism	5/275	25/8007	0.00139118	0.00222291	0.00044335	367/3569/3643/5054/1588	5
DOID:4531	mucoepidermoid carcinoma	5/275	25/8007	0.00139118	0.00222291	0.00044335	7157/5594/1956/5595/4193	5
DOID:0060262	gallbladder disease	6/275	37/8007	0.00147273	0.00234962	0.000468622	367/2099/2100/7157/54658/338	6
DOID:986	alopecia areata	5/275	26/8007	0.00167473	0.00266782	0.000532087	6347/3383/3458/4846/356	5
DOID:1679	cystitis	4/275	16/8007	0.00178677	0.00283334	0.000565099	7157/3569/1950/5111	4
DOID:321	tropical spastic paraparesis	4/275	16/8007	0.00178677	0.00283334	0.000565099	7422/3569/4318/7040	4
DOID:3265	chronic granulomatous disease	4/275	16/8007	0.00178677	0.00283334	0.000565099	653361/27035/1666/79400	4
DOID:9415	allergic asthma	7/275	52/8007	0.00185806	0.00294192	0.000586755	3565/3586/4318/4846/5054/7040/6590	7
DOID:0050728	glycogen metabolism disorder	3/275	8/8007	0.00197384	0.00307402	0.000613101	3576/6517/5837	3
DOID:0060073	lymphatic system cancer	3/275	8/8007	0.00197384	0.00307402	0.000613101	836/3458/842	3
DOID:1518	cecal disease	3/275	8/8007	0.00197384	0.00307402	0.000613101	3569/6401/7412	3
DOID:2747	glycogen storage disease	3/275	8/8007	0.00197384	0.00307402	0.000613101	3576/6517/5837	3
DOID:4236	carcinosarcoma	3/275	8/8007	0.00197384	0.00307402	0.000613101	7157/1364/4193	3
DOID:495	sclerosing hemangioma	3/275	8/8007	0.00197384	0.00307402	0.000613101	367/7157/4318	3
DOID:591	phobic disorder	3/275	8/8007	0.00197384	0.00307402	0.000613101	367/6530/3356	3
DOID:8337	appendicitis	3/275	8/8007	0.00197384	0.00307402	0.000613101	3569/6401/7412	3
DOID:9065	leishmaniasis	3/275	8/8007	0.00197384	0.00307402	0.000613101	3458/3586/356	3
DOID:9470	bacterial meningitis	3/275	8/8007	0.00197384	0.00307402	0.000613101	4353/4313/4318	3
DOID:9974	drug dependence	3/275	8/8007	0.00197384	0.00307402	0.000613101	6531/6532/3356	3
DOID:3275	thymoma	5/275	27/8007	0.0019985	0.00310778	0.000619834	2099/4313/4318/5728/331	5
DOID:1273	respiratory syncytial virus infectious disease	4/275	17/8007	0.00227408	0.00351541	0.000701134	3565/3458/3576/4318	4
DOID:13564	aspergillosis	4/275	17/8007	0.00227408	0.00351541	0.000701134	3586/3552/3553/3569	4
DOID:1969	cerebral palsy	4/275	17/8007	0.00227408	0.00351541	0.000701134	3486/3569/3576/2936	4
DOID:5395	functioning pituitary adenoma	4/275	17/8007	0.00227408	0.00351541	0.000701134	3569/2064/5111/1813	4
DOID:9446	cholangitis	5/275	28/8007	0.00236571	0.00365165	0.000728307	5468/7157/1029/3383/3569	5
DOID:2277	gonadal disease	8/275	70/8007	0.00260432	0.00400811	0.000799402	367/3569/3643/5728/5054/8644/1588/2908	8
DOID:5656	cranial nerve disease	8/275	70/8007	0.00260432	0.00400811	0.000799402	6531/7157/596/836/4313/4318/4846/3949	8
DOID:10211	cholelithiasis	5/275	29/8007	0.00277963	0.00426537	0.00085071	367/2099/2100/54658/338	5
DOID:12177	common variable immunodeficiency	5/275	29/8007	0.00277963	0.00426537	0.00085071	3565/959/3586/5328/331	5
DOID:2730	epidermolysis bullosa	4/275	18/8007	0.00284575	0.00435404	0.000868395	1277/3486/4312/7040	4
DOID:3262	phagocyte bactericidal dysfunction	4/275	18/8007	0.00284575	0.00435404	0.000868395	653361/27035/1666/79400	4
DOID:10688	hypertrophy of breast	3/275	9/8007	0.00288593	0.00438981	0.00087553	367/5728/1588	3
DOID:13042	persistent fetal circulation syndrome	3/275	9/8007	0.00288593	0.00438981	0.00087553	7422/3091/7124	3
DOID:14175	von Hippel-Lindau disease	3/275	9/8007	0.00288593	0.00438981	0.00087553	595/3091/6530	3
DOID:9840	esotropia	3/275	9/8007	0.00288593	0.00438981	0.00087553	596/4318/3949	3
DOID:2731	vesiculobullous skin disease	4/275	19/8007	0.00350848	0.00532128	0.00106131	1277/3486/4312/7040	4
DOID:9206	Barrett's esophagus	4/275	19/8007	0.00350848	0.00532128	0.00106131	890/1029/3315/3569	4
DOID:1459	hypothyroidism	6/275	44/8007	0.00365893	0.00554142	0.00110521	4843/3565/3486/50506/6373/7124	6
DOID:12185	otosclerosis	3/275	10/8007	0.00401874	0.00595685	0.00118807	1277/650/7040	3
DOID:13636	Fanconi's anemia	3/275	10/8007	0.00401874	0.00595685	0.00118807	3458/581/3320	3
DOID:13949	interstitial cystitis	3/275	10/8007	0.00401874	0.00595685	0.00118807	7157/3569/1950	3
DOID:14203	childhood type dermatomyositis	3/275	10/8007	0.00401874	0.00595685	0.00118807	3552/3553/3569	3
DOID:14256	adult-onset Still's disease	3/275	10/8007	0.00401874	0.00595685	0.00118807	3162/7040/356	3
DOID:1498	cholera	3/275	10/8007	0.00401874	0.00595685	0.00118807	3553/3576/338	3
DOID:1678	chronic interstitial cystitis	3/275	10/8007	0.00401874	0.00595685	0.00118807	7157/3569/1950	3
DOID:2438	dermis tumor	3/275	10/8007	0.00401874	0.00595685	0.00118807	367/5743/4318	3
DOID:3314	angiomyolipoma	3/275	10/8007	0.00401874	0.00595685	0.00118807	7157/3458/1956	3
DOID:4418	cutaneous fibrous histiocytoma	3/275	10/8007	0.00401874	0.00595685	0.00118807	367/5743/4318	3
DOID:4449	macular retinal edema	3/275	10/8007	0.00401874	0.00595685	0.00118807	7422/4846/3791	3
DOID:5200	urinary tract obstruction	3/275	10/8007	0.00401874	0.00595685	0.00118807	3091/1950/7040	3
DOID:5394	prolactinoma	3/275	10/8007	0.00401874	0.00595685	0.00118807	2064/5111/1813	3
DOID:6929	retinal edema	3/275	10/8007	0.00401874	0.00595685	0.00118807	7422/4846/3791	3
DOID:8929	atrophic gastritis	3/275	10/8007	0.00401874	0.00595685	0.00118807	3553/3558/356	3
DOID:583	hemolytic anemia	7/275	60/8007	0.00424959	0.00627407	0.00125134	1026/2152/3586/5328/7056/54658/2539	7
DOID:720	normocytic anemia	7/275	60/8007	0.00424959	0.00627407	0.00125134	1026/2152/3586/5328/7056/54658/2539	7
DOID:12140	Chagas disease	4/275	20/8007	0.00426877	0.00627407	0.00125134	3458/3586/3569/7124	4
DOID:12252	Cushing's syndrome	4/275	20/8007	0.00426877	0.00627407	0.00125134	3569/3576/150/2908	4
DOID:1920	hyperuricemia	4/275	20/8007	0.00426877	0.00627407	0.00125134	9429/7124/7498/9370	4
DOID:540	strabismus	4/275	20/8007	0.00426877	0.00627407	0.00125134	596/4313/4318/3949	4
DOID:14250	Down syndrome	7/275	61/8007	0.00466309	0.006844	0.00136501	836/6347/3569/6647/351/4128/760	7
DOID:2228	thrombocytosis	5/275	33/8007	0.00496776	0.00728094	0.00145215	367/7422/598/3383/3569	5
DOID:11396	pulmonary edema	3/275	11/8007	0.00538658	0.00780718	0.00155711	7422/1364/4846	3
DOID:1387	hypolipoproteinemia	3/275	11/8007	0.00538658	0.00780718	0.00155711	4547/3949/338	3
DOID:154	mixed cell type cancer	3/275	11/8007	0.00538658	0.00780718	0.00155711	7157/1364/4193	3
DOID:1586	rheumatic fever	3/275	11/8007	0.00538658	0.00780718	0.00155711	3383/7040/7124	3
DOID:2089	constipation	3/275	11/8007	0.00538658	0.00780718	0.00155711	5742/5743/6532	3
DOID:2566	corneal dystrophy	3/275	11/8007	0.00538658	0.00780718	0.00155711	332/847/7040	3
DOID:4724	brain edema	3/275	11/8007	0.00538658	0.00780718	0.00155711	7422/1401/3569	3
DOID:9779	bowel dysfunction	3/275	11/8007	0.00538658	0.00780718	0.00155711	5742/5743/6532	3
DOID:649	prion disease	4/275	22/8007	0.00610681	0.0088388	0.00176286	5743/43/1509/351	4
DOID:1680	chronic cystitis	3/275	12/8007	0.00700152	0.0100918	0.00201278	7157/3569/1950	3
DOID:5688	Werner syndrome	3/275	12/8007	0.00700152	0.0100918	0.00201278	4609/142/1432	3
DOID:7188	autoimmune thyroiditis	3/275	12/8007	0.00700152	0.0100918	0.00201278	5743/3627/6347	3
DOID:11723	Duchenne muscular dystrophy	4/275	23/8007	0.00719623	0.0103582	0.0020659	6696/4313/7076/2908	4
DOID:3405	histiocytosis	5/275	37/8007	0.00816239	0.0117327	0.00234005	4306/7157/841/3553/9332	5
DOID:12858	Huntington's disease	6/275	52/8007	0.00840013	0.0120505	0.00240343	4129/207/2002/4313/6647/1385	6
DOID:2452	thrombophilia	4/275	24/8007	0.00840654	0.0120505	0.00240343	7422/2152/5054/7056	4
DOID:9884	muscular dystrophy	9/275	103/8007	0.00873312	0.0125015	0.00249338	7422/596/1029/3643/6696/4313/7124/7076/2908	9
DOID:3086	gingival overgrowth	3/275	13/8007	0.00887351	0.0126333	0.00251966	3569/4314/7040	3
DOID:3133	acute porphyria	3/275	13/8007	0.00887351	0.0126333	0.00251966	2944/1544/9429	3
DOID:841	extrinsic allergic alveolitis	3/275	13/8007	0.00887351	0.0126333	0.00251966	3627/3458/3552	3
DOID:8584	Burkitt lymphoma	3/275	13/8007	0.00887351	0.0126333	0.00251966	3586/581/4609	3
DOID:13543	hyperparathyroidism	4/275	25/8007	0.0097428	0.013852	0.00276273	1277/595/1026/4846	4
DOID:10327	anthracosis	2/275	5/8007	0.0109728	0.01526	0.00304355	841/7124	2
DOID:1073	renal hypertension	2/275	5/8007	0.0109728	0.01526	0.00304355	4353/3162	2
DOID:12326	chronic pulmonary heart disease	2/275	5/8007	0.0109728	0.01526	0.00304355	6532/4313	2
DOID:13476	supraglottis cancer	2/275	5/8007	0.0109728	0.01526	0.00304355	4313/5728	2
DOID:14512	candidal paronychia	2/275	5/8007	0.0109728	0.01526	0.00304355	3627/1432	2
DOID:14557	primary pulmonary hypertension	2/275	5/8007	0.0109728	0.01526	0.00304355	6532/4313	2
DOID:2691	myoma	2/275	5/8007	0.0109728	0.01526	0.00304355	857/1026	2
DOID:368	cerebrum cancer	2/275	5/8007	0.0109728	0.01526	0.00304355	7157/332	2
DOID:3950	adrenal carcinoma	2/275	5/8007	0.0109728	0.01526	0.00304355	595/891	2
DOID:4006	bladder transitional cell carcinoma	2/275	5/8007	0.0109728	0.01526	0.00304355	1029/356	2
DOID:4706	infratentorial cancer	2/275	5/8007	0.0109728	0.01526	0.00304355	4609/4233	2
DOID:4852	pleomorphic xanthoastrocytoma	2/275	5/8007	0.0109728	0.01526	0.00304355	7157/1029	2
DOID:7763	carcinoma of supraglottis	2/275	5/8007	0.0109728	0.01526	0.00304355	4313/5728	2
DOID:8791	breast carcinoma in situ	2/275	5/8007	0.0109728	0.01526	0.00304355	5743/857	2
DOID:9976	heroin dependence	2/275	5/8007	0.0109728	0.01526	0.00304355	6532/3356	2
DOID:0080006	bone development disease	6/275	55/8007	0.0109845	0.01526	0.00304355	3725/1277/2697/1543/5447/860	6
DOID:11247	disseminated intravascular coagulation	3/275	14/8007	0.0110106	0.01526	0.00304355	2152/5054/7056	3
DOID:13268	porphyria	3/275	14/8007	0.0110106	0.01526	0.00304355	2944/1544/9429	3
DOID:9667	placental abruption	3/275	14/8007	0.0110106	0.01526	0.00304355	2152/3586/4846	3
DOID:205	hyperostosis	4/275	26/8007	0.0112097	0.0155155	0.00309449	1277/6347/595/125	4
DOID:1279	ocular motility disease	5/275	40/8007	0.0113373	0.0156506	0.00312144	6531/596/4313/4318/3949	5
DOID:896	metal metabolism disorder	5/275	40/8007	0.0113373	0.0156506	0.00312144	4353/650/6347/54658/779	5
DOID:1024	leprosy	5/275	41/8007	0.0125592	0.0173145	0.0034533	3458/3586/3569/7124/4048	5
DOID:2352	hemochromatosis	4/275	27/8007	0.0128117	0.0176393	0.00351808	4353/650/6347/54658	4
DOID:14268	sclerosing cholangitis	3/275	15/8007	0.013419	0.0184511	0.00368001	1029/3383/3569	3
DOID:12217	Lewy body dementia	5/275	42/8007	0.0138673	0.0190425	0.00379795	6531/2002/6696/4846/351	5
DOID:11201	parathyroid gland disease	4/275	28/8007	0.0145527	0.0199574	0.00398043	1277/595/1026/4846	4
DOID:10154	small intestine cancer	2/275	6/8007	0.0160882	0.0213283	0.00425384	5743/2064	2
DOID:1039	prolymphocytic leukemia	2/275	6/8007	0.0160882	0.0213283	0.00425384	7422/11200	2
DOID:11130	secondary hypertension	2/275	6/8007	0.0160882	0.0213283	0.00425384	4353/3162	2
DOID:11615	penile cancer	2/275	6/8007	0.0160882	0.0213283	0.00425384	7157/1029	2
DOID:12169	carpal tunnel syndrome	2/275	6/8007	0.0160882	0.0213283	0.00425384	2099/5241	2
DOID:12287	Crimean-Congo hemorrhagic fever	2/275	6/8007	0.0160882	0.0213283	0.00425384	836/3569	2
DOID:12309	urticaria pigmentosa	2/275	6/8007	0.0160882	0.0213283	0.00425384	596/598	2
DOID:12705	Friedreich ataxia	2/275	6/8007	0.0160882	0.0213283	0.00425384	5468/4780	2
DOID:13088	periventricular leukomalacia	2/275	6/8007	0.0160882	0.0213283	0.00425384	4843/3558	2
DOID:1856	cherubism	2/275	6/8007	0.0160882	0.0213283	0.00425384	7124/4772	2
DOID:2942	bronchiolitis	2/275	6/8007	0.0160882	0.0213283	0.00425384	6347/3383	2
DOID:3449	penis carcinoma	2/275	6/8007	0.0160882	0.0213283	0.00425384	7157/1029	2
DOID:4411	hepatitis E	2/275	6/8007	0.0160882	0.0213283	0.00425384	3091/1956	2
DOID:4682	extrahepatic bile duct carcinoma	2/275	6/8007	0.0160882	0.0213283	0.00425384	857/1026	2
DOID:490	hemangioma of lung	2/275	6/8007	0.0160882	0.0213283	0.00425384	367/4318	2
DOID:573	nerve compression syndrome	2/275	6/8007	0.0160882	0.0213283	0.00425384	2099/5241	2
DOID:5766	pulmonary sclerosing hemangioma	2/275	6/8007	0.0160882	0.0213283	0.00425384	367/4318	2
DOID:7941	Barrett's adenocarcinoma	2/275	6/8007	0.0160882	0.0213283	0.00425384	5468/7040	2
DOID:8515	Cor pulmonale	2/275	6/8007	0.0160882	0.0213283	0.00425384	6532/4313	2
DOID:8538	reticulosarcoma	2/275	6/8007	0.0160882	0.0213283	0.00425384	836/842	2
DOID:9478	postpartum depression	2/275	6/8007	0.0160882	0.0213283	0.00425384	6532/4128	2
DOID:9719	proliferative vitreoretinopathy	2/275	6/8007	0.0160882	0.0213283	0.00425384	7422/3576	2
DOID:9720	vitreous disease	2/275	6/8007	0.0160882	0.0213283	0.00425384	7422/3576	2
DOID:988	mitral valve prolapse	2/275	6/8007	0.0160882	0.0213283	0.00425384	1281/5328	2
DOID:2526	prostate adenocarcinoma	3/275	16/8007	0.0161034	0.0213283	0.00425384	367/4313/5970	3
DOID:5241	hemangioblastoma	3/275	16/8007	0.0161034	0.0213283	0.00425384	595/3091/6530	3
DOID:61	mitral valve disease	3/275	16/8007	0.0161034	0.0213283	0.00425384	1281/5328/7124	3
DOID:1389	polyneuropathy	4/275	29/8007	0.0164364	0.0216869	0.00432536	6532/7422/4313/351	4
DOID:3007	breast ductal carcinoma	4/275	29/8007	0.0164364	0.0216869	0.00432536	596/1026/3576/5328	4
DOID:9834	hyperopia	4/275	29/8007	0.0164364	0.0216869	0.00432536	596/4313/4318/3949	4
DOID:3947	adrenal gland hyperfunction	4/275	30/8007	0.018466	0.0243035	0.00484724	3569/3576/150/2908	4
DOID:5353	colonic disease	4/275	30/8007	0.018466	0.0243035	0.00484724	5742/5743/6532/5594	4
DOID:11971	synostosis	3/275	17/8007	0.0190668	0.0250312	0.00499236	3725/2697/5447	3
DOID:3490	Noonan syndrome	3/275	17/8007	0.0190668	0.0250312	0.00499236	5327/5894/5054	3
DOID:10573	osteomalacia	2/275	7/8007	0.0220172	0.028335	0.0056513	8856/5894	2
DOID:10772	thrombotic thrombocytopenic purpura	2/275	7/8007	0.0220172	0.028335	0.0056513	7422/2152	2
DOID:13099	Moyamoya disease	2/275	7/8007	0.0220172	0.028335	0.0056513	836/4314	2
DOID:13138	acute proliferative glomerulonephritis	2/275	7/8007	0.0220172	0.028335	0.0056513	6347/7040	2
DOID:13139	crescentic glomerulonephritis	2/275	7/8007	0.0220172	0.028335	0.0056513	6347/7040	2
DOID:1595	endogenous depression	2/275	7/8007	0.0220172	0.028335	0.0056513	6532/4128	2
DOID:1614	male breast cancer	2/275	7/8007	0.0220172	0.028335	0.0056513	2099/11200	2
DOID:1928	Williams-Beuren syndrome	2/275	7/8007	0.0220172	0.028335	0.0056513	3315/5111	2
DOID:2034	encephalomalacia	2/275	7/8007	0.0220172	0.028335	0.0056513	4843/3558	2
DOID:2773	contact dermatitis	2/275	7/8007	0.0220172	0.028335	0.0056513	3552/3553	2
DOID:3132	porphyria cutanea tarda	2/275	7/8007	0.0220172	0.028335	0.0056513	2944/1544	2
DOID:4331	burning mouth syndrome	2/275	7/8007	0.0220172	0.028335	0.0056513	3558/3569	2
DOID:4677	keratitis	2/275	7/8007	0.0220172	0.028335	0.0056513	4313/4318	2
DOID:4830	adenosquamous carcinoma	2/275	7/8007	0.0220172	0.028335	0.0056513	1956/3791	2
DOID:5425	ovarian hyperstimulation syndrome	2/275	7/8007	0.0220172	0.028335	0.0056513	7422/3576	2
DOID:7608	parathyroid adenoma	2/275	7/8007	0.0220172	0.028335	0.0056513	596/595	2
DOID:11722	myotonic dystrophy type 1	3/275	18/8007	0.022311	0.0286777	0.00571966	1029/3643/7124	3
DOID:4971	myelofibrosis	5/275	49/8007	0.0256309	0.0329046	0.00656268	7422/3576/7040/7124/2335	5
DOID:1342	congenital hypoplastic anemia	3/275	19/8007	0.0258365	0.0331278	0.0066072	3458/581/3320	3
DOID:11695	portal vein thrombosis	2/275	8/8007	0.0286984	0.036484	0.00727658	5054/1559	2
DOID:1618	breast fibroadenoma	2/275	8/8007	0.0286984	0.036484	0.00727658	2697/2064	2
DOID:2321	dyspepsia	2/275	8/8007	0.0286984	0.036484	0.00727658	5742/27035	2
DOID:2345	plasma protein metabolism disease	2/275	8/8007	0.0286984	0.036484	0.00727658	3586/7124	2
DOID:3663	cutaneous mastocytosis	2/275	8/8007	0.0286984	0.036484	0.00727658	596/598	2
DOID:7400	Nijmegen breakage syndrome	2/275	8/8007	0.0286984	0.036484	0.00727658	7157/4609	2
DOID:8506	bullous pemphigoid	2/275	8/8007	0.0286984	0.036484	0.00727658	3383/6401	2
DOID:13133	HELLP syndrome	3/275	21/8007	0.0337275	0.0425667	0.00848976	5054/7056/356	3
DOID:2316	brain ischemia	3/275	21/8007	0.0337275	0.0425667	0.00848976	7422/596/1401	3
DOID:450	myotonic disease	3/275	21/8007	0.0337275	0.0425667	0.00848976	1029/3643/7124	3
DOID:4539	labyrinthine disease	3/275	21/8007	0.0337275	0.0425667	0.00848976	1277/650/7040	3
DOID:4752	multiple system atrophy	3/275	21/8007	0.0337275	0.0425667	0.00848976	2932/3383/3576	3
DOID:53	pituitary gland disease	3/275	21/8007	0.0337275	0.0425667	0.00848976	1029/3486/3569	3
DOID:0060039	autoimmune disease of skin and connective tissue	2/275	9/8007	0.0360734	0.0451457	0.00900413	3383/6401	2
DOID:10873	Kuhnt-Junius degeneration	2/275	9/8007	0.0360734	0.0451457	0.00900413	7422/1401	2
DOID:12297	Vogt-Koyanagi-Harada disease	2/275	9/8007	0.0360734	0.0451457	0.00900413	3458/7299	2
DOID:582	hemoglobinuria	2/275	9/8007	0.0360734	0.0451457	0.00900413	5328/2539	2
DOID:585	nephrolithiasis	2/275	9/8007	0.0360734	0.0451457	0.00900413	3553/6696	2
DOID:9651	systolic heart failure	2/275	9/8007	0.0360734	0.0451457	0.00900413	4313/4318	2
DOID:9965	toxoplasmosis	2/275	9/8007	0.0360734	0.0451457	0.00900413	3458/3586	2
DOID:1800	neuroendocrine carcinoma	3/275	22/8007	0.0380886	0.0475539	0.00948444	1026/6696/4133	3
DOID:3181	oligodendroglioma	3/275	22/8007	0.0380886	0.0475539	0.00948444	598/2944/2950	3
DOID:12554	hemolytic-uremic syndrome	3/275	23/8007	0.0427225	0.0532757	0.0106256	1026/2152/7056	3
DOID:1080	filariasis	2/275	10/8007	0.044087	0.0544574	0.0108613	7422/3558	2
DOID:10908	hydrocephalus	2/275	10/8007	0.044087	0.0544574	0.0108613	836/356	2
DOID:1159	functional gastric disease	2/275	10/8007	0.044087	0.0544574	0.0108613	5742/27035	2
DOID:13025	retinopathy of prematurity	2/275	10/8007	0.044087	0.0544574	0.0108613	7422/4846	2
DOID:13550	angle-closure glaucoma	2/275	10/8007	0.044087	0.0544574	0.0108613	4318/4846	2
DOID:2113	coccidiosis	2/275	10/8007	0.044087	0.0544574	0.0108613	3458/3586	2
DOID:2340	craniosynostosis	2/275	10/8007	0.044087	0.0544574	0.0108613	3725/5447	2
DOID:8437	intestinal obstruction	2/275	10/8007	0.044087	0.0544574	0.0108613	6331/5594	2
DOID:1682	congenital heart disease	5/275	58/8007	0.048156	0.0594133	0.0118497	6532/7422/2152/2697/1559	5
